# Supplementary material for: Halide Abstraction Competes with Oxidative Addition in the Reactions of Aryl Halides with [Ni(PMenPh(3−n))4]
Source: PubMed Central journal article supplement (PMC5725734; doi:10.1002/chem.201702331), 2017-11-20
Supplement: CHEM-23-16728-s001.pdf [file CHEM-23-16728-s001.pdf]

# CHEMISTRY

## A **European** Journal

### Supporting Information

#### **Halide Abstraction Competes with Oxidative Addition in the Reactions of Aryl Halides with $[\text{Ni}(\text{PMe}_n\text{Ph}_{(3-n)})_4]$**

Ignacio Funes-Ardoiz,<sup>[a]</sup> David J. Nelson,<sup>\*[b]</sup> and Feliu Maseras<sup>\*[a, c]</sup>

chem\_201702331\_sm\_miscellaneous\_information.pdf

## Contents

|                                                                                                    |     |
|----------------------------------------------------------------------------------------------------|-----|
| COMPUTATIONAL DETAILS .....                                                                        | S2  |
| BENCHMARK OF FUNCTIONALS .....                                                                     | S3  |
| PHOSPHINE DISSOCIATION POTENTIAL ENERGY RELAXED SCAN FROM Ni(PMe <sub>3</sub> ) <sub>4</sub> ..... | S4  |
| ALTERNATIVE MECHANISMS.....                                                                        | S5  |
| (A) Outer-sphere electron transfer from [Ni(PMe <sub>3</sub> ) <sub>4</sub> ] to ArX .....         | S5  |
| (B) Inner-sphere electron transfer from [Ni(PMe <sub>3</sub> ) <sub>3</sub> ] to ArX .....         | S6  |
| (C) Oxidative Addition Pathway from [Ni(PMe <sub>3</sub> ) <sub>2</sub> ] .....                    | S7  |
| MICROKINETIC MODEL .....                                                                           | S8  |
| (A) Reaction between [Ni(PMe <sub>3</sub> ) <sub>4</sub> ] to PhI in toluene .....                 | S8  |
| (B) Reaction between [Ni(PMe <sub>3</sub> ) <sub>4</sub> ] to PhBr in THF .....                    | S10 |
| COORDINATES AND ENERGIES FOR MINIMA AND TRANSITION STATES .....                                    | S12 |
| REFERENCES .....                                                                                   | S74 |

## COMPUTATIONAL DETAILS

Calculations were performed using Gaussian09 (Rev. D01)<sup>1</sup> at the B3LYP level of theory<sup>2,3,4</sup> with Grimme's D3 dispersion correction.<sup>5</sup> This correction renders B3LYP appropriate for studying organometallic chemistry.<sup>6</sup> For optimizations and frequency calculations, the 6-31G(d) basis set<sup>7,8,9</sup> was used for H, C, N, O, P, and Cl atoms, and the LANL2DZdp basis set/ECP<sup>10</sup> used for Br and I, and LANL2LTZ(f)<sup>11,12,13</sup> for Ni. The potential energies were refined using the same basis set for Br, I and Ni, and increasing the basis set for H, C, N, O, P and Cl, using 6-311+G(d,p).<sup>14</sup> The solvent is experimentally significant, so all calculations were carried out in solvent (using the SMD method for implicit solvation), unless otherwise stated. Unless otherwise stated all calculations were carried out on THF. Toluene and *n*-hexane were used in specific cases (see the manuscript text for discussion of solvent effects).

The nature of each stationary point was verified using frequency analyses, and IRC calculations were used to verify that transition states linked the relevant minima. Free energy corrections were computed at 298 K and 1 atm. All energies quoted are Gibbs free energies in solution, in kcal mol<sup>-1</sup>. Enthalpies are given in the schemes, in brackets, in kcal mol<sup>-1</sup>.

In the case of open-shell singlet structures, where  $S^2$  is not zero, we corrected the energy by applying the Yamaguchi's equation,<sup>15,16,17,18</sup> in the form:<sup>19</sup>

$$E_{singlet} = \frac{2E_{OSS} - E_{triplet}\langle S^2 \rangle_{OSS}}{2 - \langle S^2 \rangle_{OSS}}$$

where  $E_{OSS}$  is the energy of open-shell singlet calculation,  $E_{triplet}$  is the energy of the triplet state at the open-shell singlet geometry and  $\langle S^2 \rangle_{OSS}$  is the  $S^2$  value of the open-shell singlet calculation.

PEt<sub>3</sub> has a number of possible conformations, so the ligands were truncated to PMe<sub>3</sub>, which has similar properties (Tolman electronic parameter = 2064.1 cm<sup>-1</sup> for PMe<sub>3</sub>, 2061.7 cm<sup>-1</sup> for PEt<sub>3</sub>; cone angle = 118° for PMe<sub>3</sub>, 132° for PEt<sub>3</sub>).<sup>20</sup> Tolman determined that both ligands undergo fast ligand exchange at a Ni<sup>0</sup> centre in benzene or toluene solution, although PEt<sub>3</sub> has a slightly greater propensity for dissociation.<sup>21</sup>

## BENCHMARK OF FUNCTIONALS

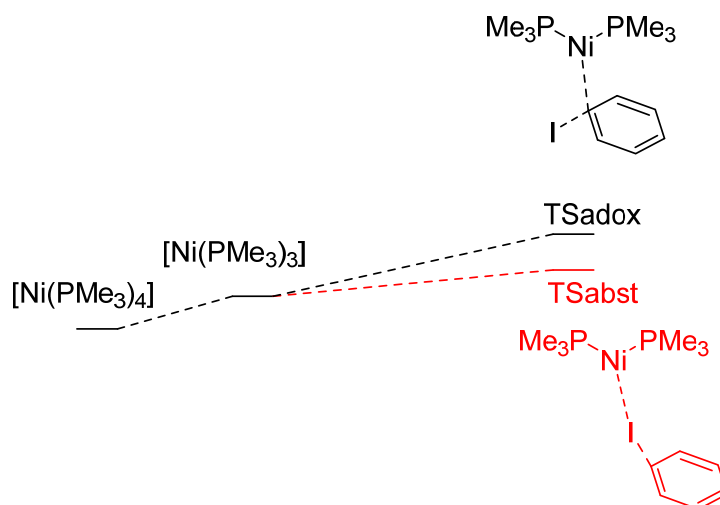

**Table S1.** Comparison of four different functionals on the key step of Ni(0) oxidation with PhI. Free energies in kcal/mol.

| Method*         | $\text{Ni}(\text{PMe}_3)_4$ | $\text{Ni}(\text{PMe}_3)_3$ | TSadox | TSabst |
|-----------------|-----------------------------|-----------------------------|--------|--------|
| B3LYP-D3        | 0.0                         | 7.8                         | 16.2   | 10.0   |
| TPSSH-D3        | 0.0                         | 13.4                        | 16.2   | 14.8   |
| $\omega$ B97X-D | 0.0                         | 10.1                        | 21.5   | 11.4   |
| PBE1PBE-D3      | 0.0                         | 12.2                        | 19.4   | 11.4   |

\* Single point energies on B3LYP-D3 geometries using the LANL2DZdp basis set/ECP for I, LANL2LTZ(f) for Ni and 6-311+G(d,p) for the rest of atoms, with free energy corrections from B3LYP-D3 calculations.

The evaluation of different functionals in the key step with PhI and  $\text{PMe}_3$  as ligand shows minor differences among all of them. The open-shell single electronic structure for the halogen abstraction transition state was found to be the most stable electronic structure in all the cases (using the wavefunction stability evaluation of g09). We selected B3LYP-D3 as the functional because the dissociation energy of the phosphine was the most consistent with experimental data and the evaluation of the product ratio provides a full agreement with the experimental observations.

## PHOSPHINE DISSOCIATION POTENTIAL ENERGY RELAXED SCAN FROM Ni(PMe<sub>3</sub>)<sub>4</sub>

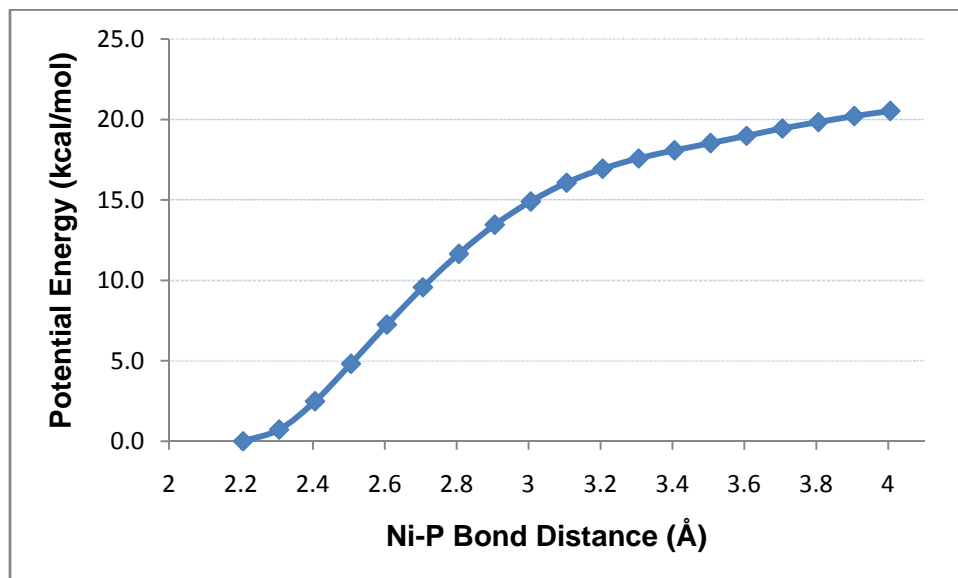

**Figure S1.** Potential energy relaxed scan for the phosphine dissociation in Ni(PMe<sub>3</sub>)<sub>4</sub> complex.

According to the scan, there is no activation barrier for the phosphine dissociation in Ni(PMe<sub>3</sub>)<sub>4</sub> complex.

## ALTERNATIVE MECHANISMS

### (A) Outer-sphere electron transfer from $[\text{Ni}(\text{PMe}_3)_4]$ to ArX

Electron transfer from  $[\text{Ni}(\text{PMe}_3)_4]$  to ArX could in theory occur *via* an outer sphere mechanism, to form  $[\text{Ni}(\text{PMe}_3)_4]^+$  and the radical anion of ArX; the latter would then spontaneously dissociate  $\text{X}^-$  to form an aryl radical. This was explored using Marcus-Hush theory, where the barrier to electron transfer can be estimated using equations S1-S3. This assumes that the major energetic barrier is the rearrangement of the products immediately following the electron transfer event. This has been successfully used to describe the reactions of aryl halides with 'super electron donors'.<sup>22</sup>

$$\Delta G^\ddagger \approx (\lambda_i/4) \cdot (1 + \Delta G/\lambda_i)^2 \quad (\text{S1})$$

$$\lambda_i = (1/2) \cdot (\lambda_i(\text{NiP4}^+) + \lambda_i(\text{ArX})) \quad (\text{S2})$$

$$\lambda_i (\text{species}) = (E_N(\text{R}_C) - E_N(\text{R}_N)) + (E_C(\text{R}_N) - E_C(\text{R}_C)) \quad (\text{S3})$$

- $\lambda_i$  is the internal reorganisation energy;  $\lambda_i(\text{NiP4}^+)$  is the internal reorganisation energy of  $[\text{Ni}(\text{PMe}_3)_4]^+$ ; and  $\lambda_i(\text{ArX})$  is the internal reorganisation energy of ArX radical anion
- $\Delta G$  is the free energy change of the reaction
- $E_N(\text{R}_N)$  and  $E_C(\text{R}_C)$  are the energies of the neutral and charged species in their respective geometries;  $E_C(\text{R}_N)$  and  $E_N(\text{R}_C)$  are the single point energies of the neutral and charged geometries as charged and neutral species, respectively.

While the initial result with  $[\text{Ni}(\text{PMe}_3)]_4$  and PhI in THF was sensible ( $\Delta G^\ddagger = 15.6 \text{ kcal mol}^{-1}$ ), barriers for PhBr and in toluene and hexane were far too high to account for the  $\text{Ni}^{\text{I}}$  products observed, albeit in reduced quantities, in these reactions (see Table S2). The major contributor to these energies was the very large value of  $\Delta G$  for this process in non-polar solvents.

**Table S2.** Calculated energies for outer-sphere electron transfer from  $[\text{Ni}(\text{PMe}_3)_4]$  to ArX.

| Solvent | Aryl Halide | $\Delta G$ (kcal/mol) | $\lambda_i$ (kcal/mol) | $\Delta G^\ddagger$ (kcal/mol) |
|---------|-------------|-----------------------|------------------------|--------------------------------|
| THF     | PhI         | 1.2                   | 59.9                   | 15.6                           |
| THF     | PhBr        | 11.8                  | 63.6                   | 22.3                           |
| Toluene | PhI         | 29.8                  | 56.8                   | 33.0                           |
| Hexane  | PhI         | 38.3                  | 61.6                   | 40.5                           |

**(B) Inner-sphere electron transfer from  $[\text{Ni}(\text{PMe}_3)_3]$  to ArX**

Inner-sphere electron transfer from  $[\text{Ni}(\text{PMe}_3)_3]$  to ArX could occur *via* complex  $[\text{Ni}(\text{PMe}_3)_3(\text{XAr})]$ , with a concomitant change in multiplicity from singlet to triplet. This cannot be described by a simple transition state, and instead requires the geometry at which the singlet and triplet have the same energy to be located, termed the minimum energy crossing point (MECP).

The software tool published by Harvey was used, and the MECP could be located for a number of examples. However, the energies of MECPs for aryl bromides were too high to compete with oxidative addition to  $[\text{Ni}(\text{PMe}_3)_2]$  (see Table S3). Energies are quoted as a range, because these structures typically have imaginary frequencies when either or both of the singlet and triplet frequency calculations are performed; there is a small discrepancy in their free energies, because the MECP calculation seeks the geometry at which the *potential energy E* is the same for both singlet and triplet.

**Table S3.** Calculated minimum energy crossing points for inner-sphere electron transfer from  $[\text{Ni}(\text{PMe}_3)_4]$  to ArX.

| Solvent | Aryl Halide | MECP $G_{\text{rel}}$ (kcal/mol) |
|---------|-------------|----------------------------------|
| THF     | PhI         | 15.0 – 15.2                      |
| THF     | PhBr        | 22.5 – 22.6                      |
| Toluene | PhI         | 16.5 – 16.8                      |
| Toluene | PhBr        | 23.9 – 24.6                      |
| Hexane  | PhI         | 16.7 – 17.1                      |
| Hexane  | PhBr        | 24.7 – 26.0                      |

(C) Oxidative Addition Pathway from  $[\text{Ni}(\text{PMe}_3)_2]$

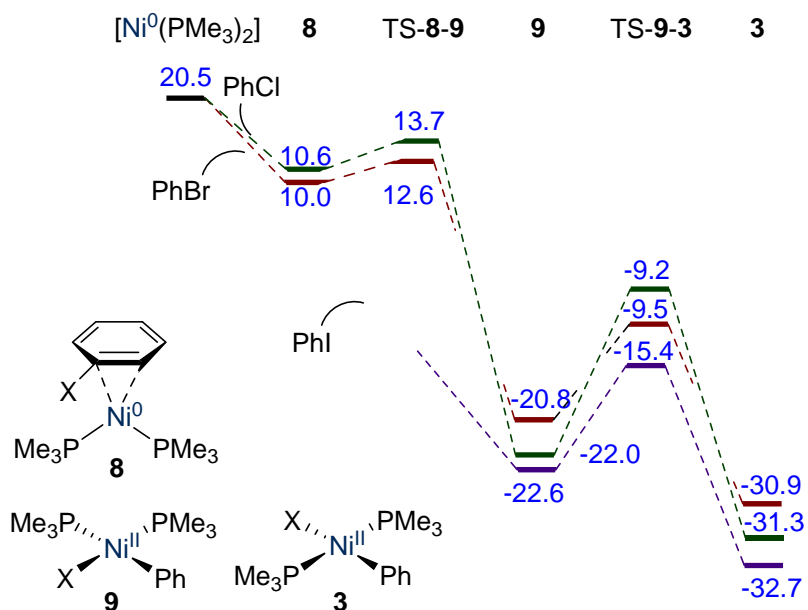

**Figure S2.** Oxidative addition of PhI (purple), PhBr (brown), and PhCl (green) to  $[\text{Ni}(\text{PMe}_3)_2]$ . Energies are in kcal mol<sup>-1</sup>.

The dissociation energy of the second phosphine is always higher than the oxidative addition transition state from  $[\text{Ni}(\text{PMe}_3)_3]$ , so this mechanism is unfavourable in the three cases. We could not find the barrier for PhI oxidative addition, due to the high reactivity of this species with  $\text{Ni}(\text{P})_2$ , which forms the  $\text{Ni}(\text{II})$  product **9** directly.



## MICROKINETIC MODEL

### (A) Reaction between $[\text{Ni}(\text{PMe}_3)_4]$ to PhI in toluene

We used the COPASI program package to run the reactions used in the microkinetic model, with the following equations:

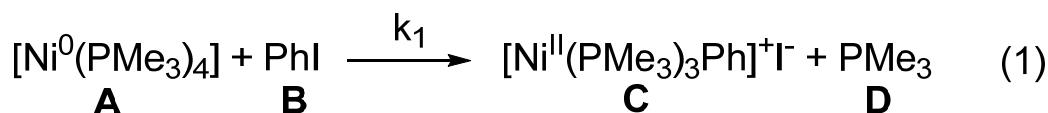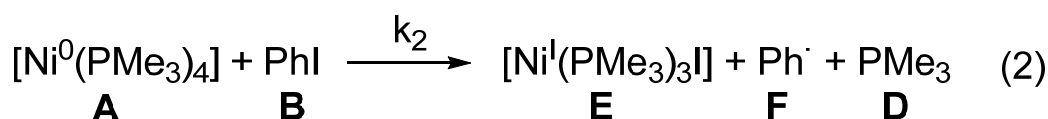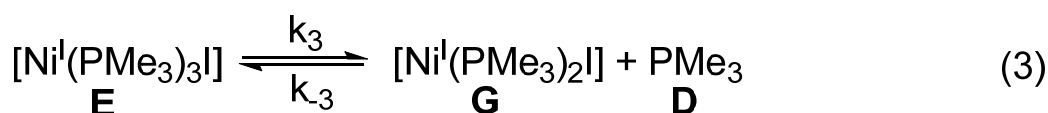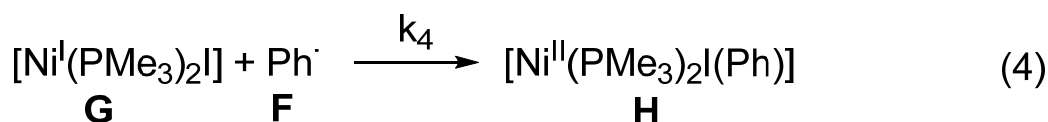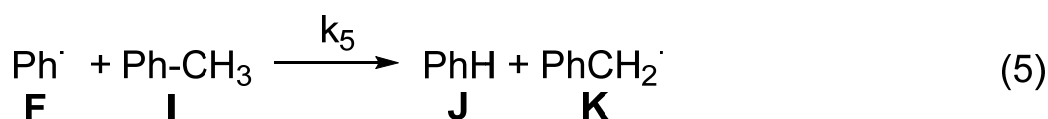

The activation energies and the associated kinetic constants are in Table 4

**Table S4.** Calculated activation free energies and kinetic constants of kinetic model of the reaction between  $[\text{Ni}(\text{PMe}_3)_4]$  and PhI in toluene.

| Reaction       | $\Delta G^\ddagger$ (kcal/mol) | Kinetic constant ( $\text{M}^{-1}\cdot\text{s}$ ) |
|----------------|--------------------------------|---------------------------------------------------|
| 1              | 16.7                           | 3.514                                             |
| 2              | 9.4                            | 7.932e+5                                          |
| 3              | 10.0                           | 2.784e+5                                          |
| 3( $k_3$ )     | 3.7                            | 1.18e+10                                          |
| 4 <sup>1</sup> | 3.7                            | 1.18e+10                                          |
| 5              | 10.6                           | 1.046e+5                                          |

The reactions 3 and 4 are barrierless. For this reason, we considered them as diffusion-controlled, with the rate constant given by the equation  $k_{\text{diff}} = 8k_bT/(3\eta) \cdot 1000 \cdot N_a$ , in  $\text{M}^{-1}\cdot\text{s}$ .<sup>23</sup> The viscosity of toluene at 298 K is  $0.560 \text{ mPa}\cdot\text{s}$ .<sup>24</sup> The diffusion rate constant would correspond to an associated activation free energy of 3.7 kcal/mol, calculated from Eyring equation.

The conditions used to analyze the time course of the reaction were 0.01s in 20 steps, obtaining the results in Table S5. The initial concentrations were taken from the experiments (0.005 M for species

A and B and solvent concentration calculated from the density at 25°C (12.2 M for THF). The numbers represent the concentration of labelled species in mol per litre (Table S5).

**Table S5.** Concentrations of different species in solution during reaction time in mol/L for the reaction between  $[\text{Ni}(\text{PMe}_3)_4]$  and PhI in toluene.

| Time (s) | A        | B        | C        | D        | E        | F        | G        | H        | I        | J        | K        |
|----------|----------|----------|----------|----------|----------|----------|----------|----------|----------|----------|----------|
| 0        | 0.005    | 0        | 0        | 0        | 0        | 0        | 0        | 0        | 0        | 9.39     | 0        |
| 0.0005   | 1.68E-03 | 1.68E-03 | 1.47E-08 | 3.88E-03 | 2.76E-03 | 1.89E-06 | 1.68E-05 | 5.44E-04 | 9.39E+00 | 2.78E-03 | 2.78E-03 |
| 0.001    | 1.01E-03 | 1.01E-03 | 1.77E-08 | 4.67E-03 | 3.32E-03 | 6.83E-07 | 1.68E-05 | 6.57E-04 | 9.39E+00 | 3.34E-03 | 3.34E-03 |
| 0.0015   | 7.20E-04 | 7.20E-04 | 1.90E-08 | 5.00E-03 | 3.56E-03 | 3.49E-07 | 1.68E-05 | 7.05E-04 | 9.39E+00 | 3.58E-03 | 3.58E-03 |
| 0.002    | 5.60E-04 | 5.60E-04 | 1.97E-08 | 5.19E-03 | 3.69E-03 | 2.11E-07 | 1.68E-05 | 7.32E-04 | 9.39E+00 | 3.71E-03 | 3.71E-03 |
| 0.0025   | 4.58E-04 | 4.58E-04 | 2.01E-08 | 5.31E-03 | 3.78E-03 | 1.41E-07 | 1.68E-05 | 7.49E-04 | 9.39E+00 | 3.79E-03 | 3.79E-03 |
| 0.003    | 3.88E-04 | 3.88E-04 | 2.04E-08 | 5.39E-03 | 3.83E-03 | 1.01E-07 | 1.68E-05 | 7.61E-04 | 9.39E+00 | 3.85E-03 | 3.85E-03 |
| 0.0035   | 3.36E-04 | 3.36E-04 | 2.07E-08 | 5.45E-03 | 3.88E-03 | 7.60E-08 | 1.68E-05 | 7.69E-04 | 9.39E+00 | 3.89E-03 | 3.89E-03 |
| 0.004    | 2.96E-04 | 2.96E-04 | 2.08E-08 | 5.50E-03 | 3.91E-03 | 5.91E-08 | 1.68E-05 | 7.76E-04 | 9.39E+00 | 3.93E-03 | 3.93E-03 |
| 0.0045   | 2.65E-04 | 2.65E-04 | 2.10E-08 | 5.53E-03 | 3.94E-03 | 4.74E-08 | 1.68E-05 | 7.81E-04 | 9.39E+00 | 3.95E-03 | 3.95E-03 |
| 0.005    | 2.40E-04 | 2.40E-04 | 2.11E-08 | 5.56E-03 | 3.96E-03 | 3.88E-08 | 1.68E-05 | 7.86E-04 | 9.39E+00 | 3.97E-03 | 3.97E-03 |
| 0.0055   | 2.19E-04 | 2.19E-04 | 2.12E-08 | 5.59E-03 | 3.97E-03 | 3.23E-08 | 1.68E-05 | 7.89E-04 | 9.39E+00 | 3.99E-03 | 3.99E-03 |
| 0.006    | 2.02E-04 | 2.02E-04 | 2.13E-08 | 5.61E-03 | 3.99E-03 | 2.74E-08 | 1.68E-05 | 7.92E-04 | 9.39E+00 | 4.01E-03 | 4.01E-03 |
| 0.0065   | 1.87E-04 | 1.87E-04 | 2.13E-08 | 5.62E-03 | 4.00E-03 | 2.35E-08 | 1.68E-05 | 7.95E-04 | 9.39E+00 | 4.02E-03 | 4.02E-03 |
| 0.007    | 1.74E-04 | 1.74E-04 | 2.14E-08 | 5.64E-03 | 4.01E-03 | 2.03E-08 | 1.68E-05 | 7.97E-04 | 9.39E+00 | 4.03E-03 | 4.03E-03 |
| 0.0075   | 1.63E-04 | 1.63E-04 | 2.14E-08 | 5.65E-03 | 4.02E-03 | 1.78E-08 | 1.68E-05 | 7.99E-04 | 9.39E+00 | 4.04E-03 | 4.04E-03 |
| 0.008    | 1.53E-04 | 1.53E-04 | 2.15E-08 | 5.66E-03 | 4.03E-03 | 1.57E-08 | 1.68E-05 | 8.00E-04 | 9.39E+00 | 4.05E-03 | 4.05E-03 |
| 0.0085   | 1.44E-04 | 1.44E-04 | 2.15E-08 | 5.67E-03 | 4.04E-03 | 1.40E-08 | 1.68E-05 | 8.02E-04 | 9.39E+00 | 4.05E-03 | 4.05E-03 |
| 0.009    | 1.36E-04 | 1.36E-04 | 2.15E-08 | 5.68E-03 | 4.04E-03 | 1.25E-08 | 1.68E-05 | 8.03E-04 | 9.39E+00 | 4.06E-03 | 4.06E-03 |
| 0.0095   | 1.29E-04 | 1.29E-04 | 2.16E-08 | 5.69E-03 | 4.05E-03 | 1.12E-08 | 1.68E-05 | 8.04E-04 | 9.39E+00 | 4.07E-03 | 4.07E-03 |
| 0.01     | 1.23E-04 | 1.23E-04 | 2.16E-08 | 5.70E-03 | 4.05E-03 | 1.02E-08 | 1.68E-05 | 8.05E-04 | 9.39E+00 | 4.07E-03 | 4.07E-03 |

The ratio of Ni(I) vs Ni(II) (83:17 in this case) was obtained using the following formula:

$$\frac{[\text{Ni}(I)]}{[\text{Ni}(II)]} = \frac{[\text{Ph}I]}{[[\text{Ni}(II)(\text{PMe}_3)_3\text{Ph}]^+I^-] + [\text{Ni}(II)(\text{PMe}_3)_2(\text{Ph})I]}$$

**(B) Reaction between [Ni(PMe<sub>3</sub>)<sub>4</sub>] to PhBr in THF**

We ran the same microkinetic model for the reaction between Ni complex and PhBr in THF. The reactions were:

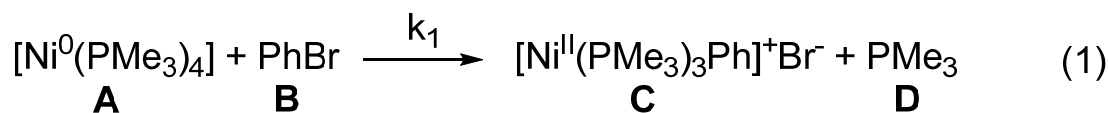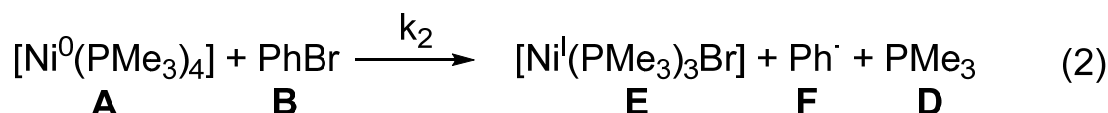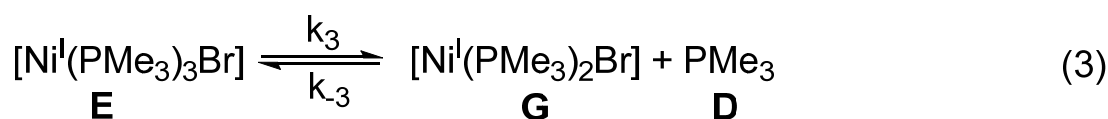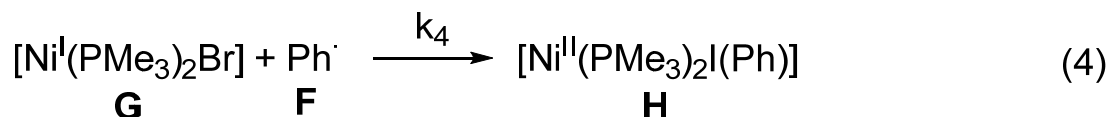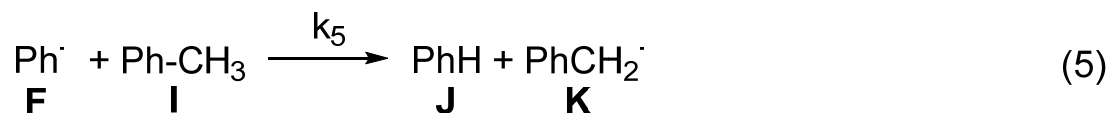

The activation energies and the associated kinetic constants are in Table S6:

**Table S6.** Calculated activation free energies and kinetic constants of kinetic model of the reaction between [Ni(PMe<sub>3</sub>)<sub>4</sub>] and PhBr in THF.

| Reaction            | $\Delta G^\ddagger$ (kcal/mol) | Kinetic constant (M <sup>-1</sup> ·s) |
|---------------------|--------------------------------|---------------------------------------|
| 1                   | 15.0                           | 62.015                                |
| 2                   | 16.3                           | 6.904                                 |
| 3                   | 6.0                            | 2.471e+8                              |
| 3(k <sub>-3</sub> ) | 3.6                            | 1.45e+10                              |
| 4 <sup>1</sup>      | 3.6                            | 1.45e+10                              |
| 5                   | 9.5                            | 6.700e+5                              |

The reactions 3 and 4 are also barrierless. We applied the same methodology that above, using the experimental value of 0.456 mPa·s for the viscosity of THF.<sup>25</sup> The associated activation free energy was calculated from Eyring equation and is 3.6 kcal/mol.

**Table S7.** Concentrations of different species in solution along reaction time in mol/L for the reaction between  $[\text{Ni}(\text{PMe}_3)_4]$  and PhBr in THF.

| Time (s) | A        | B        | C        | D        | E        | F        | G        | H        | I        | J        | K        |   |
|----------|----------|----------|----------|----------|----------|----------|----------|----------|----------|----------|----------|---|
| 0        | 0.005    | 0.005    | 0        | 0        | 0        | 0        | 0        | 0        | 0        | 12.22    | 0        | 0 |
| 9        | 1.22E-03 | 1.22E-03 | 3.40E-03 | 4.10E-03 | 5.94E-05 | 8.72E-13 | 2.47E-04 | 7.23E-05 | 1.22E+01 | 3.06E-04 | 3.06E-04 |   |
| 18       | 6.94E-04 | 6.94E-04 | 3.87E-03 | 4.66E-03 | 7.36E-05 | 2.75E-13 | 2.69E-04 | 8.88E-05 | 1.22E+01 | 3.43E-04 | 3.43E-04 |   |
| 27       | 4.85E-04 | 4.85E-04 | 4.06E-03 | 4.89E-03 | 7.95E-05 | 1.33E-13 | 2.77E-04 | 9.56E-05 | 1.22E+01 | 3.57E-04 | 3.57E-04 |   |
| 36       | 3.73E-04 | 3.73E-04 | 4.16E-03 | 5.01E-03 | 8.27E-05 | 7.83E-14 | 2.81E-04 | 9.93E-05 | 1.22E+01 | 3.64E-04 | 3.64E-04 |   |
| 45       | 3.03E-04 | 3.03E-04 | 4.23E-03 | 5.08E-03 | 8.47E-05 | 5.15E-14 | 2.84E-04 | 1.02E-04 | 1.22E+01 | 3.69E-04 | 3.69E-04 |   |
| 54       | 2.55E-04 | 2.55E-04 | 4.27E-03 | 5.13E-03 | 8.61E-05 | 3.64E-14 | 2.86E-04 | 1.03E-04 | 1.22E+01 | 3.72E-04 | 3.72E-04 |   |
| 63       | 2.20E-04 | 2.20E-04 | 4.30E-03 | 5.17E-03 | 8.72E-05 | 2.71E-14 | 2.87E-04 | 1.04E-04 | 1.22E+01 | 3.74E-04 | 3.74E-04 |   |
| 72       | 1.94E-04 | 1.94E-04 | 4.32E-03 | 5.20E-03 | 8.79E-05 | 2.10E-14 | 2.88E-04 | 1.05E-04 | 1.22E+01 | 3.76E-04 | 3.76E-04 |   |
| 81       | 1.73E-04 | 1.73E-04 | 4.34E-03 | 5.22E-03 | 8.85E-05 | 1.67E-14 | 2.89E-04 | 1.06E-04 | 1.22E+01 | 3.78E-04 | 3.78E-04 |   |
| 90       | 1.56E-04 | 1.56E-04 | 4.36E-03 | 5.24E-03 | 8.90E-05 | 1.36E-14 | 2.90E-04 | 1.07E-04 | 1.22E+01 | 3.79E-04 | 3.79E-04 |   |
| 99       | 1.42E-04 | 1.42E-04 | 4.37E-03 | 5.25E-03 | 8.94E-05 | 1.13E-14 | 2.90E-04 | 1.07E-04 | 1.22E+01 | 3.80E-04 | 3.80E-04 |   |
| 108      | 1.31E-04 | 1.31E-04 | 4.38E-03 | 5.27E-03 | 8.98E-05 | 9.53E-15 | 2.91E-04 | 1.07E-04 | 1.22E+01 | 3.80E-04 | 3.80E-04 |   |
| 117      | 1.21E-04 | 1.21E-04 | 4.39E-03 | 5.28E-03 | 9.01E-05 | 8.15E-15 | 2.91E-04 | 1.08E-04 | 1.22E+01 | 3.81E-04 | 3.81E-04 |   |
| 126      | 1.13E-04 | 1.13E-04 | 4.40E-03 | 5.29E-03 | 9.03E-05 | 7.05E-15 | 2.91E-04 | 1.08E-04 | 1.22E+01 | 3.81E-04 | 3.81E-04 |   |
| 135      | 1.05E-04 | 1.05E-04 | 4.40E-03 | 5.29E-03 | 9.05E-05 | 6.16E-15 | 2.91E-04 | 1.08E-04 | 1.22E+01 | 3.82E-04 | 3.82E-04 |   |
| 144      | 9.88E-05 | 9.88E-05 | 4.41E-03 | 5.30E-03 | 9.07E-05 | 5.43E-15 | 2.92E-04 | 1.09E-04 | 1.22E+01 | 3.82E-04 | 3.82E-04 |   |
| 153      | 9.31E-05 | 9.31E-05 | 4.42E-03 | 5.31E-03 | 9.09E-05 | 4.82E-15 | 2.92E-04 | 1.09E-04 | 1.22E+01 | 3.83E-04 | 3.83E-04 |   |
| 162      | 8.80E-05 | 8.80E-05 | 4.42E-03 | 5.31E-03 | 9.11E-05 | 4.30E-15 | 2.92E-04 | 1.09E-04 | 1.22E+01 | 3.83E-04 | 3.83E-04 |   |
| 171      | 8.34E-05 | 8.34E-05 | 4.42E-03 | 5.32E-03 | 9.12E-05 | 3.87E-15 | 2.92E-04 | 1.09E-04 | 1.22E+01 | 3.83E-04 | 3.83E-04 |   |
| 180      | 7.93E-05 | 7.93E-05 | 4.43E-03 | 5.32E-03 | 9.13E-05 | 3.50E-15 | 2.92E-04 | 1.09E-04 | 1.22E+01 | 3.84E-04 | 3.84E-04 |   |

The conditions that are used to analyze the time course of the reaction were 180 s in 20 steps, obtaining the Table S7. The initial concentrations were taken from the experiments (0.005 M for species A and B and solvent concentration calculated from the density at 25°C (12.2 M for THF). The numbers represent the concentration of labelled species in mol per litre.

The ratio of Ni(I) vs Ni(II) (8:92 in this case) was obtained using the following formula:

$$\frac{[\text{Ni}(I)]}{[\text{Ni}(II)]} = \frac{[\text{PhH}]}{[[\text{Ni}(II)(\text{PMe}_3)_3\text{Ph}]^+\text{Br}^-] + [\text{Ni}(II)(\text{PMe}_3)_2(\text{Ph})\text{Br}]}$$

# COORDINATES AND ENERGIES FOR MINIMA AND TRANSITION STATES

Energies are given in Hartrees and correspond to the potential energy with the large basis set (first line) and to the free energy correction (second line). The energies used to compute all the profiles were calculated by the sum of  $E + G_{\text{corr}}$ . In the case of open-shell singlet structures, the values of the potential energy at triplet electronic structure and the  $S^2$  of the open-shell singlet are also provided.

Coordinates are Cartesian coordinates in Å.

## In Tetrahydrofuran

### Ni(PMe<sub>3</sub>)<sub>4</sub>

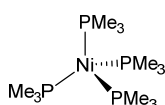

|                   |   |                                    |
|-------------------|---|------------------------------------|
| E                 | = | -2014.13817957                     |
| G <sub>corr</sub> | = | 0.403583                           |
| Ni                |   | 2.97381100 7.49675000 11.85409900  |
| P                 |   | 1.37271500 8.84467500 11.13266300  |
| P                 |   | 2.20232100 6.27155600 13.51844500  |
| C                 |   | 0.89366400 10.25111400 12.25430200 |
| C                 |   | -0.32028500 8.16982600 10.75440800 |
| C                 |   | 1.64237000 9.81235900 9.56509700   |
| C                 |   | 2.55471800 6.82320300 15.26175000  |
| C                 |   | 0.36359500 6.01879000 13.68224400  |
| C                 |   | 2.73487100 4.49313900 13.67924800  |
| H                 |   | 0.06919600 10.85075300 11.84660400 |
| H                 |   | 1.76215600 10.90192100 12.40339800 |
| H                 |   | -0.99638400 8.94063300 10.36095200 |
| H                 |   | -0.76101600 7.74569400 11.66173000 |
| H                 |   | 1.69654200 9.12553800 8.71509500   |
| H                 |   | 2.59494300 10.35007200 9.62310200  |
| H                 |   | 2.17994800 7.84212700 15.40599100  |
| H                 |   | 3.63677800 6.83117300 15.43343700  |
| H                 |   | -0.12463500 6.98511600 13.85086800 |
| H                 |   | 0.11165200 5.34883700 14.51507000  |
| H                 |   | 2.35690800 3.92165300 12.82559900  |
| H                 |   | 2.36069900 4.03111600 14.60259900  |
| P                 |   | 4.57490600 8.84467500 12.57553600  |
| P                 |   | 3.74530100 6.27155500 10.18975400  |
| C                 |   | 5.05395800 10.25111300 11.45389700 |
| C                 |   | 6.26790600 8.16982500 12.95379100  |
| C                 |   | 4.30525200 9.81235900 14.14310200  |
| C                 |   | 3.39290300 6.82320300 8.44644900   |
| C                 |   | 5.58402600 6.01879000 10.02595500  |
| C                 |   | 3.21275000 4.49313900 10.02895100  |
| H                 |   | 5.87842600 10.85075200 11.86159500 |
| H                 |   | 4.18546600 10.90192100 11.30480100 |
| H                 |   | 6.94400500 8.94063200 13.34724800  |
| H                 |   | 6.70863700 7.74569400 12.04646900  |

|   |  |                                    |
|---|--|------------------------------------|
| H |  | 4.25107900 9.12553800 14.99310400  |
| H |  | 3.35267900 10.35007200 14.08509700 |
| H |  | 3.76767300 7.84212700 8.30220800   |
| H |  | 2.31084300 6.83117300 8.27476200   |
| H |  | 6.07225600 6.98511600 9.85733000   |
| H |  | 5.83596900 5.34883700 9.19312900   |
| H |  | 3.59071400 3.92165300 10.88260000  |
| H |  | 3.58692200 4.03111600 9.10560000   |
| H |  | 0.59726200 9.85542400 13.23208300  |
| H |  | -0.23262500 7.36424900 10.01614700 |
| H |  | 0.83498600 10.53369400 9.38176000  |
| H |  | 3.86048500 6.16419300 7.70282700   |
| H |  | 5.97907600 5.59522600 10.95569700  |
| H |  | 2.11850700 4.43465200 10.03648300  |
| H |  | 3.82911400 4.43465200 13.67171600  |
| H |  | -0.03145400 5.59522600 12.75250200 |
| H |  | 2.08713600 6.16419300 16.00537200  |
| H |  | 5.11263600 10.53369400 14.32643800 |
| H |  | 5.35036000 9.85542400 10.47611600  |
| H |  | 6.18024600 7.36424900 13.69205200  |

### Ni(PMe<sub>3</sub>)<sub>3</sub>

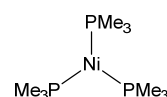

|                   |   |                                    |
|-------------------|---|------------------------------------|
| E                 | = | -1552.92475226                     |
| G <sub>corr</sub> | = | 0.291517                           |
| Ni                |   | 2.96964300 7.43814400 11.73948900  |
| P                 |   | 1.78588200 9.17165100 11.21717900  |
| P                 |   | 2.68132400 6.67241600 13.74450700  |
| C                 |   | 1.79598400 10.58439200 12.42628900 |
| C                 |   | -0.04181500 8.86861400 11.07777300 |
| C                 |   | 2.06963900 10.11393500 9.63767100  |
| C                 |   | 3.57495300 7.68797300 15.01798000  |
| C                 |   | 0.97902400 6.63470300 14.49173100  |
| C                 |   | 3.25422900 4.96917000 14.22969100  |
| H                 |   | 1.15551600 11.41351500 12.09851300 |
| H                 |   | 2.82005700 10.95505800 12.54912700 |
| H                 |   | -0.59829000 9.79323900 10.87757200 |
| H                 |   | -0.40559000 8.42471400 12.01072500 |
| H                 |   | 1.96570000 9.43010700 8.78771700   |
| H                 |   | 3.09258400 10.50757700 9.63084000  |

|   |             |             |             |
|---|-------------|-------------|-------------|
| H | 3.22238500  | 8.72419700  | 14.96670900 |
| H | 4.64846300  | 7.68635400  | 14.79843400 |
| H | 0.55792400  | 7.64612100  | 14.49004800 |
| H | 0.98845100  | 6.25528300  | 15.52202300 |
| H | 2.72224900  | 4.22273200  | 13.62852200 |
| H | 3.08263200  | 4.75512200  | 15.29300900 |
| P | 4.45383700  | 6.54153700  | 10.44821300 |
| C | 4.60327800  | 7.07980900  | 8.67297700  |
| C | 6.21303400  | 6.77898100  | 10.99831900 |
| C | 4.42707200  | 4.69818700  | 10.21154500 |
| H | 4.80172900  | 8.15715900  | 8.64422400  |
| H | 3.65177000  | 6.90058000  | 8.15895700  |
| H | 6.43056300  | 7.85029900  | 11.07367200 |
| H | 6.92678200  | 6.32004700  | 10.30218900 |
| H | 4.50401700  | 4.20697500  | 11.18799600 |
| H | 5.24597500  | 4.35075900  | 9.56835400  |
| H | 1.44614000  | 10.22958800 | 13.40207200 |
| H | -0.23565700 | 8.15585000  | 10.26833200 |
| H | 1.36788200  | 10.94931000 | 9.51041000  |
| H | 5.40333300  | 6.55470500  | 8.13409900  |
| H | 6.34660700  | 6.33642200  | 11.99147800 |
| H | 3.47314100  | 4.40221900  | 9.76000300  |
| H | 4.32488100  | 4.87366400  | 14.01640900 |
| H | 0.32692000  | 5.99561100  | 13.88540800 |
| H | 3.41884200  | 7.30404700  | 16.03434000 |

### Ni(PMe<sub>3</sub>)<sub>2</sub>

|                   |   | Me <sub>3</sub> P—Ni—PMe <sub>3</sub> |             |             |
|-------------------|---|---------------------------------------|-------------|-------------|
| E                 | = | -1091.70993065                        |             |             |
| G <sub>corr</sub> | = | 0.185935                              |             |             |
| Ni                |   | 2.97940200                            | 7.45613300  | 11.84238900 |
| P                 |   | 1.82760700                            | 9.14688900  | 11.21331900 |
| P                 |   | 4.14634600                            | 5.79697500  | 12.52380600 |
| C                 |   | 1.88491500                            | 10.63783100 | 12.31406000 |
| C                 |   | -0.00276200                           | 8.91183500  | 11.03663200 |
| C                 |   | 2.24526000                            | 9.90515700  | 9.57415300  |
| C                 |   | 5.40931900                            | 6.15031900  | 13.83403500 |
| C                 |   | 3.23801200                            | 4.37491100  | 13.29076200 |
| C                 |   | 5.18415800                            | 4.91079900  | 11.26996800 |
| H                 |   | 1.26026200                            | 11.45018600 | 11.92222000 |
| H                 |   | 2.91861800                            | 10.99001700 | 12.39950100 |
| H                 |   | -0.49668400                           | 9.83947600  | 10.72147200 |
| H                 |   | -0.42422300                           | 8.58776900  | 11.99427500 |
| H                 |   | 2.14679100                            | 9.15199800  | 8.78486600  |
| H                 |   | 3.28488800                            | 10.25016200 | 9.58631900  |
| H                 |   | 4.91251800                            | 6.56083300  | 14.71975700 |
| H                 |   | 6.12164400                            | 6.89689400  | 13.46665300 |
| H                 |   | 2.65731000                            | 4.73180200  | 14.14814100 |
| H                 |   | 3.92965900                            | 3.59271500  | 13.62725900 |
| H                 |   | 4.54245400                            | 4.51572800  | 10.47505300 |
| H                 |   | 5.74143700                            | 4.08265400  | 11.72527000 |
| H                 |   | 1.53426800                            | 10.36600100 | 13.31554000 |
| H                 |   | -0.20289600                           | 8.13003700  | 10.29592800 |

|   |            |             |             |
|---|------------|-------------|-------------|
| H | 1.58780900 | 10.75335400 | 9.34658600  |
| H | 5.89276500 | 5.61284900  | 10.81737700 |
| H | 2.54108800 | 3.94792700  | 12.56145500 |
| H | 5.95561300 | 5.24216700  | 14.11834500 |

### Ni(PMe<sub>3</sub>)

|                   |   | PMe <sub>3</sub><br> <br>Ni |            |             |
|-------------------|---|-----------------------------|------------|-------------|
| E                 | = | -630.471631181              |            |             |
| G <sub>corr</sub> | = | 0.081831                    |            |             |
| Ni                |   | 3.06794400                  | 7.21941500 | 11.85670300 |
| P                 |   | 4.21742000                  | 5.68285000 | 12.55093100 |
| C                 |   | 5.63580600                  | 6.13312300 | 13.65447800 |
| C                 |   | 3.35958800                  | 4.39542600 | 13.56937000 |
| C                 |   | 5.06362100                  | 4.63561000 | 11.27789100 |
| H                 |   | 5.25920200                  | 6.65545900 | 14.54008500 |
| H                 |   | 6.31509500                  | 6.80683700 | 13.12206300 |
| H                 |   | 2.90370800                  | 4.86361200 | 14.44790400 |
| H                 |   | 4.06244000                  | 3.61987800 | 13.89765000 |
| H                 |   | 4.31558300                  | 4.19467400 | 10.61075800 |
| H                 |   | 5.64465900                  | 3.83317600 | 11.74898300 |
| H                 |   | 5.73209000                  | 5.25981700 | 10.67574400 |
| H                 |   | 2.56361100                  | 3.93212800 | 12.97710200 |
| H                 |   | 6.18841900                  | 5.23976400 | 13.97105400 |

### PMe<sub>3</sub>

|                   |   | Me<br> <br>P<br> <br>Me |             |             |
|-------------------|---|-------------------------|-------------|-------------|
| E                 | = | -461.173291179          |             |             |
| G <sub>corr</sub> | = | 0.084310                |             |             |
| P                 |   | 1.68046600              | -0.11497800 | -0.01298200 |
| C                 |   | 2.55738000              | 0.74229000  | -1.41387900 |
| H                 |   | 2.39880900              | 0.18731300  | -2.34576300 |
| H                 |   | 2.14691600              | 1.74954600  | -1.54897100 |
| H                 |   | 3.63703800              | 0.82342500  | -1.23338400 |
| C                 |   | 2.37105300              | 0.85390800  | 1.41780600  |
| H                 |   | 1.97873600              | 1.87728700  | 1.39604500  |
| H                 |   | 2.05802300              | 0.39463300  | 2.36254700  |
| H                 |   | 3.46755700              | 0.89693200  | 1.39420500  |
| C                 |   | 2.73435100              | -1.64354700 | 0.11651900  |
| H                 |   | 2.46686700              | -2.20396100 | 1.01978800  |
| H                 |   | 2.55202200              | -2.29355600 | -0.74702300 |
| H                 |   | 3.80469200              | -1.40360800 | 0.15536100  |

### Ni(PMe<sub>2</sub>Ph)<sub>4</sub>

|   |   | PMe <sub>2</sub> Ph<br> <br>Ni<br>/ \ / \<br>PhMe <sub>2</sub> P PMe <sub>2</sub> Ph PMe <sub>2</sub> Ph |  |  |
|---|---|----------------------------------------------------------------------------------------------------------|--|--|
| E | = | -2781.32169362                                                                                           |  |  |

|                   |             |             |             |
|-------------------|-------------|-------------|-------------|
| $G_{\text{corr}}$ | =           | 0.601644    |             |
| Ni                | -0.49706400 | 0.85226400  | -0.02368300 |
| P                 | 0.01251600  | 0.52395400  | -2.15370000 |
| P                 | -1.49145900 | -0.97581000 | 0.70533100  |
| P                 | 1.42367600  | 1.04561800  | 1.05462400  |
| P                 | -1.80334900 | 2.60498900  | 0.24991400  |
| C                 | 1.44599200  | 1.50065700  | -2.82277500 |
| C                 | 1.58777700  | 2.82186900  | -2.36496000 |
| H                 | 0.87764400  | 3.20673000  | -1.64199200 |
| C                 | 2.63543100  | 3.63129200  | -2.80649600 |
| H                 | 2.71366800  | 4.65272600  | -2.44247100 |
| C                 | 3.58266900  | 3.12311500  | -3.70047800 |
| H                 | 4.40850900  | 3.74499500  | -4.03692100 |
| C                 | 3.46370500  | 1.80709300  | -4.15414400 |
| H                 | 4.19855600  | 1.40170300  | -4.84581900 |
| C                 | 2.40074000  | 1.00476600  | -3.72544200 |
| H                 | 2.33039800  | -0.01259800 | -4.09841600 |
| C                 | -1.25265400 | 0.87681700  | -3.47378900 |
| H                 | -2.14416600 | 0.27210800  | -3.27470100 |
| H                 | -0.87875100 | 0.64356400  | -4.47868900 |
| H                 | -1.53122900 | 1.93466600  | -3.43637800 |
| C                 | 0.45981000  | -1.21197800 | -2.63527700 |
| H                 | -0.37075600 | -1.86256600 | -2.34484200 |
| H                 | 1.35010000  | -1.52974500 | -2.08220500 |
| H                 | 0.63660500  | -1.33981400 | -3.70983400 |
| C                 | -2.50142700 | -1.91250700 | -0.54081700 |
| C                 | -2.31480100 | -3.26828100 | -0.85570700 |
| H                 | -1.57269000 | -3.85922200 | -0.32841100 |
| C                 | -3.07014800 | -3.88223000 | -1.86133600 |
| H                 | -2.90079400 | -4.93073300 | -2.09493400 |
| C                 | -4.03654600 | -3.15737200 | -2.56063700 |
| H                 | -4.62264800 | -3.63567300 | -3.34112900 |
| C                 | -4.23998400 | -1.80810100 | -2.25135500 |
| H                 | -4.98763600 | -1.23121700 | -2.79067800 |
| C                 | -3.47235500 | -1.19386600 | -1.26174200 |
| H                 | -3.61022300 | -0.13670100 | -1.05729600 |
| C                 | -2.75428100 | -0.82552000 | 2.06837600  |
| H                 | -3.51881900 | -0.09823100 | 1.77663000  |
| H                 | -2.25326300 | -0.45766700 | 2.97021900  |
| H                 | -3.23954100 | -1.78240600 | 2.29665000  |
| C                 | -0.43652600 | -2.32011200 | 1.43071300  |
| H                 | 0.12415400  | -1.89283200 | 2.26718100  |
| H                 | 0.28595900  | -2.66586800 | 0.68385200  |
| H                 | -1.01630100 | -3.17576000 | 1.79752000  |
| C                 | 1.44013600  | 0.45618400  | 2.81741300  |
| C                 | 0.30475800  | 0.73595300  | 3.59775500  |
| H                 | -0.52847300 | 1.25974500  | 3.13913100  |
| C                 | 0.22032500  | 0.32062800  | 4.92731500  |
| H                 | -0.66813800 | 0.55082500  | 5.51070500  |
| C                 | 1.26816400  | -0.40728100 | 5.50010800  |
| H                 | 1.20116200  | -0.74593800 | 6.53083900  |
| C                 | 2.39923900  | -0.70153700 | 4.73529000  |
| H                 | 3.21762700  | -1.26989600 | 5.17095000  |
| C                 | 2.48802200  | -0.26730000 | 3.40832700  |
| H                 | 3.38110100  | -0.50650400 | 2.83910300  |

|   |             |             |             |
|---|-------------|-------------|-------------|
| C | 2.87279200  | 0.14066400  | 0.32591400  |
| H | 2.67036100  | -0.93561000 | 0.32112100  |
| H | 3.81634100  | 0.32944400  | 0.85153700  |
| H | 2.98546300  | 0.47259700  | -0.71091700 |
| C | 2.22105300  | 2.71353100  | 1.30194400  |
| H | 1.56058100  | 3.34809800  | 1.90097300  |
| H | 2.36848500  | 3.18911900  | 0.32705200  |
| H | 3.18804700  | 2.62963300  | 1.81337100  |
| C | -1.27360600 | 4.17381100  | -0.58110800 |
| C | -1.68428800 | 4.47886500  | -1.89111400 |
| H | -2.41726800 | 3.85324000  | -2.39192000 |
| C | -1.15463300 | 5.57511400  | -2.57544900 |
| H | -1.48480700 | 5.78616900  | -3.58968800 |
| C | -0.20459800 | 6.39671000  | -1.96340500 |
| H | 0.21126500  | 7.24728800  | -2.49691000 |
| C | 0.20256300  | 6.11578200  | -0.65577600 |
| H | 0.93473800  | 6.75183500  | -0.16397400 |
| C | -0.32601500 | 5.01744000  | 0.02559000  |
| H | 0.01588100  | 4.81218700  | 1.03524600  |
| C | -2.13437100 | 3.22646400  | 1.97428100  |
| H | -2.63347800 | 2.42605600  | 2.53154900  |
| H | -2.77333900 | 4.11784700  | 1.98271800  |
| H | -1.19547800 | 3.45594400  | 2.48616600  |
| C | -3.57308600 | 2.49774500  | -0.32230300 |
| H | -4.07770900 | 1.73805200  | 0.28448000  |
| H | -3.61967100 | 2.17864900  | -1.36763600 |
| H | -4.10777600 | 3.44907700  | -0.21241800 |

### Ni(PMe<sub>2</sub>Ph)<sub>3</sub>

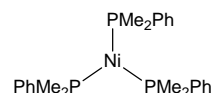

|                   |             |                |             |
|-------------------|-------------|----------------|-------------|
| E                 | =           | -2128.30803416 |             |
| $G_{\text{corr}}$ | =           | 0.439835       |             |
| Ni                | 4.19121200  | 6.76005000     | 4.08091800  |
| P                 | 5.21356600  | 6.50865700     | 2.18812400  |
| P                 | 3.70034400  | 4.96200500     | 5.16838900  |
| P                 | 3.31464100  | 8.64088100     | 4.66770700  |
| C                 | 6.68591700  | 7.57572700     | 1.85295000  |
| C                 | 6.49986900  | 8.95486200     | 1.64500700  |
| H                 | 5.49876400  | 9.37361800     | 1.63613700  |
| C                 | 7.59107200  | 9.80313500     | 1.45629400  |
| H                 | 7.41970500  | 10.86406400    | 1.29357800  |
| C                 | 8.89359000  | 9.29463600     | 1.48605800  |
| H                 | 9.74396400  | 9.95655200     | 1.34369600  |
| C                 | 9.09260500  | 7.92948300     | 1.70288900  |
| H                 | 10.10067900 | 7.52261500     | 1.72875300  |
| C                 | 7.99902900  | 7.07694100     | 1.88293000  |
| H                 | 8.17977200  | 6.01839900     | 2.04575100  |
| C                 | 4.12410700  | 6.89228000     | 0.73193300  |
| H                 | 3.25517000  | 6.22592500     | 0.77775400  |
| H                 | 4.64020300  | 6.75115700     | -0.22508300 |
| H                 | 3.76255500  | 7.92237500     | 0.80240100  |

|   |             |             |            |
|---|-------------|-------------|------------|
| C | 5.81532500  | 4.82768500  | 1.67522000 |
| H | 4.94587500  | 4.16063700  | 1.66110100 |
| H | 6.52223500  | 4.43315300  | 2.41211200 |
| H | 6.28582100  | 4.82312800  | 0.68440700 |
| C | 2.50137300  | 4.12490600  | 4.04086200 |
| C | 2.73753100  | 2.88131400  | 3.43361500 |
| H | 3.62787700  | 2.31038700  | 3.68055900 |
| C | 1.83537700  | 2.36088600  | 2.49967600 |
| H | 2.03598600  | 1.39666800  | 2.03877000 |
| C | 0.68182700  | 3.07127400  | 2.16035900 |
| H | -0.01761400 | 2.66506000  | 1.43438200 |
| C | 0.43354400  | 4.31049900  | 2.76076700 |
| H | -0.46152100 | 4.87194800  | 2.50382100 |
| C | 1.33703100  | 4.83351600  | 3.68571200 |
| H | 1.14903700  | 5.80738000  | 4.13095800 |
| C | 2.74468600  | 4.98610600  | 6.76604500 |
| H | 1.86803700  | 5.63111800  | 6.64512000 |
| H | 3.37865000  | 5.41874900  | 7.54881800 |
| H | 2.41552000  | 3.98804300  | 7.08093200 |
| C | 4.93349100  | 3.63721800  | 5.56454500 |
| H | 5.61014300  | 4.02794900  | 6.33300400 |
| H | 5.53219200  | 3.41112200  | 4.67655600 |
| H | 4.46763000  | 2.71773700  | 5.93874700 |
| C | 3.70642200  | 10.14398700 | 3.65906700 |
| C | 3.04912200  | 10.35546900 | 2.43268700 |
| H | 2.24552000  | 9.69080800  | 2.12557300 |
| C | 3.42355200  | 11.40147100 | 1.58756400 |
| H | 2.89956600  | 11.54712800 | 0.64595700 |
| C | 4.46988600  | 12.25759600 | 1.94755400 |
| H | 4.76493200  | 13.06996900 | 1.28863800 |
| C | 5.13203600  | 12.05764900 | 3.16120800 |
| H | 5.94820600  | 12.71491500 | 3.45114400 |
| C | 4.75423800  | 11.01173200 | 4.00775800 |
| H | 5.29363000  | 10.86913900 | 4.94007700 |
| C | 3.64599800  | 9.24085100  | 6.39382600 |
| H | 3.21338400  | 8.50797000  | 7.08415100 |
| H | 3.20760800  | 10.22661600 | 6.58971000 |
| H | 4.72283900  | 9.27883200  | 6.58541300 |
| C | 1.45496100  | 8.69570800  | 4.67491100 |
| H | 1.09255400  | 7.96880000  | 5.40985300 |
| H | 1.06069200  | 8.40972200  | 3.69546300 |
| H | 1.07622300  | 9.68997700  | 4.93916500 |

### Ni(PMe<sub>2</sub>Ph)<sub>2</sub>

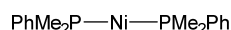

|                   |            |                |            |
|-------------------|------------|----------------|------------|
| E                 | =          | -1475.29545173 |            |
| G <sub>corr</sub> | =          | 0.28227        |            |
| Ni                | 2.92241100 | 7.11859900     | 5.19863800 |
| P                 | 3.47235300 | 5.05218800     | 5.30225500 |
| P                 | 2.40999600 | 9.18799300     | 5.00635800 |
| C                 | 2.11340800 | 3.83268800     | 5.01141200 |
| C                 | 2.32833800 | 2.44477700     | 5.01571100 |
| H                 | 3.32405800 | 2.04670600     | 5.19499900 |

|   |             |             |            |
|---|-------------|-------------|------------|
| C | 1.27041100  | 1.56232400  | 4.79070400 |
| H | 1.44994400  | 0.49012600  | 4.79674500 |
| C | -0.01768100 | 2.05566300  | 4.55728500 |
| H | -0.84021400 | 1.36703600  | 4.38190200 |
| C | -0.24309100 | 3.43400300  | 4.54980300 |
| H | -1.24185700 | 3.82310600  | 4.36866100 |
| C | 0.81737400  | 4.31589400  | 4.77552800 |
| H | 0.65178300  | 5.39162200  | 4.77119100 |
| C | 4.21624900  | 4.43587200  | 6.88614000 |
| H | 3.49925300  | 4.56974200  | 7.70273900 |
| H | 5.10810500  | 5.03064700  | 7.11204500 |
| H | 4.49844100  | 3.37864200  | 6.82494500 |
| C | 4.76298600  | 4.49912500  | 4.08951200 |
| H | 5.66612400  | 5.10065000  | 4.24023900 |
| H | 4.40248200  | 4.67022500  | 3.07013300 |
| H | 5.01517600  | 3.43931400  | 4.20944800 |
| C | 3.83168800  | 10.35892800 | 4.84879700 |
| C | 3.65586400  | 11.74603700 | 4.71739000 |
| H | 2.65526400  | 12.17093400 | 4.70650000 |
| C | 4.75923800  | 12.59286600 | 4.59918200 |
| H | 4.61005900  | 13.66494600 | 4.49808800 |
| C | 6.05430600  | 12.06388800 | 4.61090400 |
| H | 6.91236200  | 12.72481400 | 4.51901000 |
| C | 6.24110700  | 10.68584400 | 4.74103300 |
| H | 7.24509300  | 10.26925700 | 4.75062900 |
| C | 5.13512600  | 9.83966600  | 4.85908900 |
| H | 5.26999500  | 8.76438200  | 4.96032200 |
| C | 1.41358700  | 9.95775500  | 6.36900800 |
| H | 0.47799100  | 9.39765500  | 6.47613900 |
| H | 1.17894100  | 11.00892900 | 6.16680900 |
| H | 1.96654800  | 9.88717000  | 7.31131800 |
| C | 1.37048500  | 9.64012100  | 3.53769000 |
| H | 0.43129400  | 9.07790900  | 3.58412100 |
| H | 1.89456300  | 9.35605500  | 2.61936600 |
| H | 1.14435600  | 10.71207600 | 3.50680400 |

### Ni(PMe<sub>2</sub>Ph)

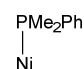

|                   |            |                |            |
|-------------------|------------|----------------|------------|
| E                 | =          | -822.264490723 |            |
| G <sub>corr</sub> | =          | 0.130288       |            |
| Ni                | 3.64952100 | 7.12531700     | 5.00244100 |
| P                 | 3.41747500 | 5.11515900     | 5.25861700 |
| C                 | 2.50041500 | 4.21075400     | 3.92761400 |
| C                 | 2.24237300 | 2.83206200     | 4.00590600 |
| H                 | 2.58070100 | 2.26020700     | 4.86635100 |
| C                 | 1.55079100 | 2.18047800     | 2.98316600 |
| H                 | 1.35592300 | 1.11348400     | 3.05667000 |
| C                 | 1.10918500 | 2.89760500     | 1.86640400 |
| H                 | 0.57117600 | 2.38864500     | 1.07077800 |
| C                 | 1.36195300 | 4.26833000     | 1.77702400 |
| H                 | 1.02235200 | 4.83123900     | 0.91130500 |
| C                 | 2.05274500 | 4.91888500     | 2.80286100 |



|   |            |            |            |
|---|------------|------------|------------|
| H | 2.25421400 | 5.98640500 | 2.74311300 |
| C | 2.51599100 | 4.58407600 | 6.79081300 |
| H | 1.50187400 | 4.99570400 | 6.77850700 |
| H | 3.04140400 | 4.98493300 | 7.66408300 |
| H | 2.46104400 | 3.49294700 | 6.87634200 |
| C | 4.97271200 | 4.11402600 | 5.40575700 |
| H | 5.55908800 | 4.49693900 | 6.24767900 |
| H | 5.56528100 | 4.22584500 | 4.49240400 |
| H | 4.75977500 | 3.05136700 | 5.56956000 |

### PMe<sub>2</sub>Ph

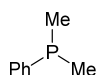

|                   |             |                |             |
|-------------------|-------------|----------------|-------------|
| E                 | =           | -652.964031445 |             |
| G <sub>corr</sub> | =           | 0.132457       |             |
| P                 | -1.30905200 | -0.28950500    | -0.03156300 |
| C                 | -0.53198400 | 0.56311500     | -1.48545100 |
| C                 | -1.37168700 | 1.16607600     | -2.43429200 |
| C                 | 0.85804100  | 0.63792200     | -1.67860600 |
| C                 | -0.84085600 | 1.82725300     | -3.54607400 |
| H                 | -2.45046600 | 1.11860000     | -2.30335400 |
| C                 | 1.39128300  | 1.29448000     | -2.78824400 |
| H                 | 1.53357900  | 0.18124100     | -0.95957900 |
| C                 | 0.54176800  | 1.89158400     | -3.72535300 |
| H                 | -1.50740400 | 2.28884400     | -4.27021800 |
| H                 | 2.46912700  | 1.34100900     | -2.92329400 |
| H                 | 0.95767700  | 2.40268700     | -4.58987700 |
| C                 | -0.37379700 | -1.90028000    | -0.01465200 |
| H                 | 0.71302900  | -1.75927200    | 0.00532400  |
| H                 | -0.66727200 | -2.47036700    | 0.87465000  |
| H                 | -0.63735500 | -2.49165700    | -0.89839400 |
| C                 | -0.44285900 | 0.57133100     | 1.37596200  |
| H                 | -0.77915700 | 1.61227200     | 1.43393200  |
| H                 | -0.70926800 | 0.07564300     | 2.31680100  |
| H                 | 0.64819800  | 0.55826200     | 1.26825500  |

### Ni(PMePh<sub>2</sub>)<sub>4</sub>

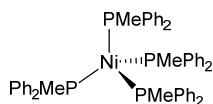

|                   |            |               |             |
|-------------------|------------|---------------|-------------|
| E                 | =          | -3548.5036579 |             |
| G <sub>corr</sub> | =          | 0.801946      |             |
| Ni                | 9.59031000 | 10.54489800   | 4.13449400  |
| P                 | 9.87146800 | 10.62134100   | 1.92237500  |
| C                 | 8.65761800 | 9.75601500    | 0.81128400  |
| C                 | 7.52397300 | 10.41534300   | 0.30694100  |
| H                 | 7.39665700 | 11.48197600   | 0.46109400  |
| C                 | 6.54045100 | 9.71644600    | -0.39894900 |
| H                 | 5.67123900 | 10.24924900   | -0.77695700 |
| C                 | 6.67334100 | 8.34394900    | -0.62267500 |
| H                 | 5.90719900 | 7.80005300    | -1.16891100 |

|   |             |             |             |
|---|-------------|-------------|-------------|
| C | 7.80715500  | 7.67943900  | -0.14481600 |
| H | 7.93011500  | 6.61357300  | -0.32113000 |
| C | 8.78660800  | 8.37778900  | 0.56176000  |
| H | 9.65572900  | 7.84194500  | 0.92929300  |
| C | 11.45461400 | 9.91898400  | 1.25612800  |
| C | 11.99216300 | 8.79464100  | 1.90215900  |
| H | 11.47276900 | 8.37774000  | 2.75750000  |
| C | 13.19301600 | 8.22396800  | 1.47436100  |
| H | 13.58519900 | 7.35070600  | 1.98908300  |
| C | 13.88904600 | 8.78522000  | 0.40025000  |
| H | 14.83204400 | 8.35480700  | 0.07299600  |
| C | 13.36400500 | 9.90448100  | -0.25229200 |
| H | 13.89823600 | 10.34717500 | -1.08947700 |
| C | 12.15250700 | 10.46113800 | 0.16566500  |
| H | 11.76819500 | 11.33019100 | -0.35832100 |
| C | 9.87591400  | 12.32571300 | 1.18371100  |
| H | 9.86814100  | 12.32920600 | 0.08887700  |
| H | 10.76620600 | 12.85065800 | 1.54408300  |
| H | 8.99973600  | 12.86941800 | 1.54666400  |
| P | 7.81248900  | 11.83305100 | 4.60153700  |
| C | 6.88495300  | 11.55674000 | 6.18703700  |
| C | 7.19289300  | 12.27375300 | 7.35741600  |
| H | 7.92532000  | 13.07396800 | 7.32413600  |
| C | 6.56370500  | 11.97935300 | 8.56869200  |
| H | 6.81621100  | 12.55309200 | 9.45726000  |
| C | 5.60997500  | 10.95958800 | 8.63816400  |
| H | 5.12125600  | 10.72846600 | 9.58112400  |
| C | 5.28340200  | 10.24876700 | 7.48082200  |
| H | 4.53801400  | 9.45812100  | 7.51504600  |
| C | 5.91044800  | 10.54639600 | 6.26830500  |
| H | 5.63723200  | 9.97716700  | 5.38682800  |
| C | 8.02798800  | 13.67866900 | 4.61893600  |
| C | 7.02729700  | 14.57342300 | 5.03608000  |
| H | 6.09018700  | 14.19366700 | 5.43490000  |
| C | 7.23122300  | 15.95188400 | 4.95652200  |
| H | 6.45167800  | 16.63312600 | 5.28888200  |
| C | 8.43425700  | 16.45814100 | 4.45006800  |
| H | 8.59039500  | 17.53230500 | 4.38983200  |
| C | 9.43076800  | 15.57788100 | 4.02533200  |
| H | 10.37000400 | 15.95608300 | 3.62978700  |
| C | 9.22413000  | 14.19833200 | 4.11366200  |
| H | 9.99025800  | 13.50553100 | 3.78634700  |
| C | 6.39111700  | 11.77595200 | 3.39594600  |
| H | 5.53313300  | 12.35332200 | 3.75680000  |
| H | 6.08146600  | 10.74645900 | 3.20907100  |
| H | 6.73454400  | 12.20670800 | 2.45231900  |
| P | 9.09892300  | 8.55186700  | 5.01251600  |
| C | 10.06402400 | 7.05019800  | 4.49069000  |
| C | 11.24938400 | 6.68408200  | 5.15014200  |
| H | 11.55819300 | 7.20679500  | 6.04895900  |
| C | 12.05244000 | 5.64844000  | 4.66490800  |
| H | 12.96562400 | 5.38580600  | 5.19356100  |
| C | 11.68416900 | 4.95173200  | 3.51131900  |
| H | 12.30995100 | 4.14830900  | 3.13180100  |
| C | 10.49682600 | 5.29246000  | 2.85611000  |

|   |             |             |             |   |             |             |             |
|---|-------------|-------------|-------------|---|-------------|-------------|-------------|
| H | 10.19120500 | 4.75110900  | 1.96406000  | P | 9.90260700  | 10.75027500 | 1.79241700  |
| C | 9.69638400  | 6.32742500  | 3.34157400  | C | 8.66182700  | 9.90016100  | 0.71748400  |
| H | 8.78020600  | 6.57759800  | 2.81638900  | C | 7.48228000  | 10.57100500 | 0.34924700  |
| C | 7.37130700  | 7.92378600  | 4.75649200  | H | 7.36049700  | 11.62453800 | 0.58287400  |
| C | 6.74620800  | 8.22139100  | 3.53554100  | C | 6.44941500  | 9.89400100  | -0.30294400 |
| H | 7.28528100  | 8.79667500  | 2.79217900  | H | 5.54456100  | 10.43042600 | -0.57788100 |
| C | 5.43729900  | 7.80930800  | 3.27552100  | C | 6.57503600  | 8.53276600  | -0.59668600 |
| H | 4.97962200  | 8.04980500  | 2.31949200  | H | 5.76898000  | 8.00456500  | -1.09915400 |
| C | 4.72093300  | 7.10699600  | 4.24827500  | C | 7.74619100  | 7.85739700  | -0.24124900 |
| H | 3.69593500  | 6.79894400  | 4.05855400  | H | 7.85512300  | 6.79936000  | -0.46658000 |
| C | 5.33204700  | 6.80239200  | 5.46829200  | C | 8.77969100  | 8.53376500  | 0.41010100  |
| H | 4.78276400  | 6.25509400  | 6.23054800  | H | 9.67773100  | 7.99322900  | 0.69208600  |
| C | 6.64900800  | 7.19792200  | 5.71667700  | C | 11.47935000 | 9.87655900  | 1.37160200  |
| H | 7.09813700  | 6.94726200  | 6.67200100  | C | 12.21113600 | 9.29576800  | 2.41582700  |
| C | 9.26291100  | 8.44852400  | 6.86142800  | H | 11.83158100 | 9.37301600  | 3.43045100  |
| H | 9.16184800  | 7.43125400  | 7.25372100  | C | 13.39747300 | 8.60295200  | 2.15802000  |
| H | 8.49656500  | 9.09003600  | 7.30794900  | H | 13.94583800 | 8.14913100  | 2.97869200  |
| H | 10.23912900 | 8.84253600  | 7.15600500  | C | 13.86204700 | 8.48097900  | 0.84716000  |
| P | 11.56535900 | 11.16998300 | 4.99441200  | H | 14.78091200 | 7.93737400  | 0.64209100  |
| C | 11.61672700 | 11.87597000 | 6.71185900  | C | 13.13851600 | 9.05455500  | -0.20481400 |
| C | 10.46879900 | 11.75001400 | 7.50153000  | H | 13.49469800 | 8.95733600  | -1.22747500 |
| H | 9.58387300  | 11.30399300 | 7.06262700  | C | 11.95593300 | 9.74794900  | 0.05585500  |
| C | 10.45666300 | 12.18307400 | 8.83048600  | H | 11.39354100 | 10.17560400 | -0.77049200 |
| H | 9.55089000  | 12.07542300 | 9.42177800  | C | 10.16056100 | 12.36692800 | 0.90612000  |
| C | 11.60269700 | 12.75465100 | 9.38569700  | H | 10.40528300 | 12.24007300 | -0.15405300 |
| H | 11.59926300 | 13.09771700 | 10.41721900 | H | 10.97971400 | 12.90273100 | 1.39839900  |
| C | 12.75882400 | 12.88587300 | 8.60726400  | H | 9.25685400  | 12.97720400 | 0.99710400  |
| H | 13.65445800 | 13.33032000 | 9.03463200  | P | 7.44597800  | 11.91802300 | 4.42499000  |
| C | 12.76776100 | 12.44598000 | 7.28269100  | C | 6.76683200  | 11.55555900 | 6.10786900  |
| H | 13.67120000 | 12.55640500 | 6.68876800  | C | 7.35127200  | 12.11038900 | 7.25913200  |
| C | 12.60161700 | 12.39813600 | 4.06076600  | H | 8.12332900  | 12.86931100 | 7.16089400  |
| C | 12.51110800 | 13.78019000 | 4.30693300  | C | 6.95253600  | 11.69920800 | 8.53249300  |
| H | 11.89436100 | 14.14454900 | 5.12211700  | H | 7.41520400  | 12.14345700 | 9.41053200  |
| C | 13.21153500 | 14.69886700 | 3.52269400  | C | 5.96432000  | 10.72094600 | 8.68038800  |
| H | 13.12771500 | 15.76143900 | 3.73811700  | H | 5.65685700  | 10.39839200 | 9.67174300  |
| C | 14.02209200 | 14.25612000 | 2.47320400  | C | 5.37617500  | 10.16114100 | 7.54278100  |
| H | 14.56551800 | 14.97067100 | 1.86037800  | H | 4.61072800  | 9.39559400  | 7.64282300  |
| C | 14.13448900 | 12.88573200 | 2.22729800  | C | 5.77390300  | 10.57321900 | 6.26901500  |
| H | 14.76585300 | 12.52374800 | 1.41976400  | H | 5.31953500  | 10.10683400 | 5.40008900  |
| C | 13.43555800 | 11.96676600 | 3.01414800  | C | 7.83900700  | 13.72130500 | 4.54925900  |
| H | 13.54045600 | 10.90950000 | 2.79758600  | C | 6.91053600  | 14.67693800 | 4.99371900  |
| C | 12.84305600 | 9.83482700  | 5.26077300  | H | 5.92093800  | 14.36242800 | 5.31610700  |
| H | 13.81909900 | 10.25909200 | 5.52054100  | C | 7.25247000  | 16.02923900 | 5.03573800  |
| H | 12.94299000 | 9.21083600  | 4.37131400  | H | 6.52564200  | 16.76115200 | 5.37935600  |
| H | 12.50602700 | 9.20455500  | 6.08760400  | C | 8.52942300  | 16.44295400 | 4.63891600  |

### Ni(PMePh<sub>2</sub>)<sub>3</sub>

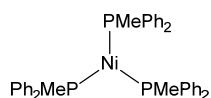

|                   |   |                                   |
|-------------------|---|-----------------------------------|
| E                 | = | -1858.88033969                    |
| G <sub>corr</sub> | = | 0.588582                          |
| Ni                |   | 8.95690100 10.55166600 3.71532900 |

|   |             |             |             |
|---|-------------|-------------|-------------|
| P | 9.90260700  | 10.75027500 | 1.79241700  |
| C | 8.66182700  | 9.90016100  | 0.71748400  |
| C | 7.48228000  | 10.57100500 | 0.34924700  |
| H | 7.36049700  | 11.62453800 | 0.58287400  |
| C | 6.44941500  | 9.89400100  | -0.30294400 |
| H | 5.54456100  | 10.43042600 | -0.57788100 |
| C | 6.57503600  | 8.53276600  | -0.59668600 |
| H | 5.76898000  | 8.00456500  | -1.09915400 |
| C | 7.74619100  | 7.85739700  | -0.24124900 |
| H | 7.85512300  | 6.79936000  | -0.46658000 |
| C | 8.77969100  | 8.53376500  | 0.41010100  |
| H | 9.67773100  | 7.99322900  | 0.69208600  |
| C | 11.47935000 | 9.87655900  | 1.37160200  |
| C | 12.21113600 | 9.29576800  | 2.41582700  |
| H | 11.83158100 | 9.37301600  | 3.43045100  |
| C | 13.39747300 | 8.60295200  | 2.15802000  |
| H | 13.94583800 | 8.14913100  | 2.97869200  |
| C | 13.86204700 | 8.48097900  | 0.84716000  |
| H | 14.78091200 | 7.93737400  | 0.64209100  |
| C | 13.13851600 | 9.05455500  | -0.20481400 |
| H | 13.49469800 | 8.95733600  | -1.22747500 |
| C | 11.95593300 | 9.74794900  | 0.05585500  |
| H | 11.39354100 | 10.17560400 | -0.77049200 |
| C | 10.16056100 | 12.36692800 | 0.90612000  |
| H | 10.40528300 | 12.24007300 | -0.15405300 |
| H | 10.97971400 | 12.90273100 | 1.39839900  |
| H | 9.25685400  | 12.97720400 | 0.99710400  |
| P | 7.44597800  | 11.91802300 | 4.42499000  |
| C | 6.76683200  | 11.55555900 | 6.10786900  |
| C | 7.35127200  | 12.11038900 | 7.25913200  |
| H | 8.12332900  | 12.86931100 | 7.16089400  |
| C | 6.95253600  | 11.69920800 | 8.53249300  |
| H | 7.41520400  | 12.14345700 | 9.41053200  |
| C | 5.96432000  | 10.72094600 | 8.68038800  |
| H | 5.65685700  | 10.39839200 | 9.67174300  |
| C | 5.37617500  | 10.16114100 | 7.54278100  |
| H | 4.61072800  | 9.39559400  | 7.64282300  |
| C | 5.77390300  | 10.57321900 | 6.26901500  |
| H | 5.31953500  | 10.10683400 | 5.40008900  |
| C | 7.83900700  | 13.72130500 | 4.54925900  |
| C | 6.91053600  | 14.67693800 | 4.99371900  |
| H | 5.92093800  | 14.36242800 | 5.31610700  |
| C | 7.25247000  | 16.02923900 | 5.03573800  |
| H | 6.52564200  | 16.76115200 | 5.37935600  |
| C | 8.52942300  | 16.44295400 | 4.63891600  |
| H | 8.79381700  | 17.49682700 | 4.67261600  |
| C | 9.46252400  | 15.49972100 | 4.20289500  |
| H | 10.45694300 | 15.81534500 | 3.89715400  |
| C | 9.11674800  | 14.14576000 | 4.15891800  |
| H | 9.83290000  | 13.40115500 | 3.81757500  |
| C | 5.89616100  | 11.95461400 | 3.39852100  |
| H | 5.08737300  | 12.51462400 | 3.88039200  |
| H | 5.56254600  | 10.93203700 | 3.20148800  |
| H | 6.13782000  | 12.42280100 | 2.43985500  |
| P | 8.94024800  | 8.69131700  | 4.83412000  |

|   |             |            |            |
|---|-------------|------------|------------|
| C | 10.10321700 | 7.31188900 | 4.41387100 |
| C | 11.28554100 | 7.09996000 | 5.14207000 |
| H | 11.48730900 | 7.67734800 | 6.04026500 |
| C | 12.22549700 | 6.15492900 | 4.71960900 |
| H | 13.13459900 | 6.00577600 | 5.29738100 |
| C | 12.00066700 | 5.40602300 | 3.56232700 |
| H | 12.73358000 | 4.67497400 | 3.23132900 |
| C | 10.82420900 | 5.60488900 | 2.83266600 |
| H | 10.63631000 | 5.02475200 | 1.93237100 |
| C | 9.88734900  | 6.54852500 | 3.25349800 |
| H | 8.98219900  | 6.69858400 | 2.67199000 |
| C | 7.29046700  | 7.87855700 | 4.60966700 |
| C | 6.58159900  | 8.14374200 | 3.42548800 |
| H | 7.02261100  | 8.79272700 | 2.67453500 |
| C | 5.31334600  | 7.59783400 | 3.21473300 |
| H | 4.78420800  | 7.81024400 | 2.28928600 |
| C | 4.72760900  | 6.79189400 | 4.19519100 |
| H | 3.73591000  | 6.37475000 | 4.03957700 |
| C | 5.42237200  | 6.52489200 | 5.37869100 |
| H | 4.97176200  | 5.89936600 | 6.14533100 |
| C | 6.69741300  | 7.05902500 | 5.58190700 |
| H | 7.22117200  | 6.84029300 | 6.50786700 |
| C | 9.10770000  | 8.78321200 | 6.67987500 |
| H | 9.21766700  | 7.80301200 | 7.15535800 |
| H | 8.22106600  | 9.28307900 | 7.07873700 |
| H | 9.97866000  | 9.39785100 | 6.92725200 |

### Ni(PMePh<sub>2</sub>)<sub>2</sub>

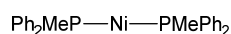

$$E = -1858.88033969$$

$$G_{\text{corr}} = 0.378772$$

|    |             |             |             |
|----|-------------|-------------|-------------|
| Ni | -1.41586700 | 1.01000500  | -0.08372400 |
| P  | -0.81611000 | 2.12220600  | -1.80758100 |
| C  | -0.98230400 | 3.95372700  | -1.63782700 |
| C  | -0.13827000 | 4.88889500  | -2.25671500 |
| H  | 0.68689900  | 4.55915400  | -2.88069700 |
| C  | -0.34634200 | 6.25947000  | -2.07586900 |
| H  | 0.31677900  | 6.97276700  | -2.55888100 |
| C  | -1.40037900 | 6.71223300  | -1.27878100 |
| H  | -1.55958500 | 7.77837900  | -1.13957500 |
| C  | -2.24431400 | 5.78901700  | -0.65378100 |
| H  | -3.06092100 | 6.13381700  | -0.02466000 |
| C  | -2.03092500 | 4.42109400  | -0.82679300 |
| H  | -2.67032400 | 3.69751600  | -0.32430600 |
| C  | -1.77848200 | 1.74749400  | -3.34441400 |
| C  | -2.49248400 | 0.54034900  | -3.39614000 |
| H  | -2.48598400 | -0.11209800 | -2.52493100 |
| C  | -3.20412300 | 0.18436200  | -4.54468500 |
| H  | -3.75252000 | -0.75384400 | -4.57229500 |
| C  | -3.21602500 | 1.03761400  | -5.65086500 |
| H  | -3.77473700 | 0.76655600  | -6.54298100 |
| C  | -2.51245700 | 2.24569200  | -5.60583500 |
| H  | -2.52325400 | 2.91437600  | -6.46293300 |

|   |             |             |             |
|---|-------------|-------------|-------------|
| C | -1.79628400 | 2.59812300  | -4.46043300 |
| H | -1.25764900 | 3.54188800  | -4.43366800 |
| C | 0.91831900  | 1.88965600  | -2.41947500 |
| H | 1.10625600  | 2.40968700  | -3.36447600 |
| H | 1.07329600  | 0.81703000  | -2.57483000 |
| H | 1.62747400  | 2.23525500  | -1.66000100 |
| P | -1.95177400 | -0.18643300 | 1.60445500  |
| C | -1.47310700 | 0.54269700  | 3.23203500  |
| C | -2.19297600 | 0.36951500  | 4.42430000  |
| H | -3.10710200 | -0.21642000 | 4.43700000  |
| C | -1.74285300 | 0.95040300  | 5.61383600  |
| H | -2.31071900 | 0.80920600  | 6.53002300  |
| C | -0.56882300 | 1.70716100  | 5.62787600  |
| H | -0.22096000 | 2.15642100  | 6.55442200  |
| C | 0.15204700  | 1.89196400  | 4.44404200  |
| H | 1.06115700  | 2.48782900  | 4.44513300  |
| C | -0.30222100 | 1.32045000  | 3.25529400  |
| H | 0.24186600  | 1.47969800  | 2.32611100  |
| C | -1.14655700 | -1.85454600 | 1.63149400  |
| C | -0.66773100 | -2.37221900 | 0.41779700  |
| H | -0.75350700 | -1.76657400 | -0.48237600 |
| C | -0.08517000 | -3.64104700 | 0.36645900  |
| H | 0.28097300  | -4.03043200 | -0.58014200 |
| C | 0.03375100  | -4.40189000 | 1.53215300  |
| H | 0.49304000  | -5.38640000 | 1.49665800  |
| C | -0.43439100 | -3.89149400 | 2.74729100  |
| H | -0.33871900 | -4.47849300 | 3.65730800  |
| C | -1.02240500 | -2.62606600 | 2.79727300  |
| H | -1.37613200 | -2.23689100 | 3.74847700  |
| C | -3.73027700 | -0.65480000 | 1.83537800  |
| H | -3.88189600 | -1.35099100 | 2.66685800  |
| H | -4.06875600 | -1.13597800 | 0.91195800  |
| H | -4.33073000 | 0.24665000  | 1.99621500  |

### Ni(PMePh<sub>2</sub>)

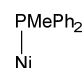

$$E = -844.755968904$$

$$G_{\text{corr}} = 0.178995$$

|    |             |             |             |
|----|-------------|-------------|-------------|
| Ni | 9.31802800  | 9.48396300  | 3.82312600  |
| P  | 9.72794500  | 10.33446600 | 2.02123500  |
| C  | 8.42705100  | 10.05837000 | 0.73423500  |
| C  | 7.94132500  | 11.06150900 | -0.11810100 |
| H  | 8.31932700  | 12.07672600 | -0.04968100 |
| C  | 6.95838200  | 10.76881400 | -1.06938600 |
| H  | 6.58988100  | 11.55719200 | -1.72090700 |
| C  | 6.45325900  | 9.47247100  | -1.18429300 |
| H  | 5.69007500  | 9.24760500  | -1.92475200 |
| C  | 6.92830900  | 8.46587800  | -0.33665000 |
| H  | 6.53529300  | 7.45547100  | -0.41527900 |
| C  | 7.90023900  | 8.75998000  | 0.61876400  |
| H  | 8.25500800  | 7.98338200  | 1.29309200  |
| C  | 11.26492300 | 9.74579400  | 1.16536100  |

|   |             |             |             |
|---|-------------|-------------|-------------|
| C | 12.23804500 | 9.06480600  | 1.91103100  |
| H | 12.05139900 | 8.86885000  | 2.96491300  |
| C | 13.42679200 | 8.64118700  | 1.31102300  |
| H | 14.17296300 | 8.11468700  | 1.90070400  |
| C | 13.65071500 | 8.88889900  | -0.04533100 |
| H | 14.57196500 | 8.55529400  | -0.51590600 |
| C | 12.68391500 | 9.56301600  | -0.79862300 |
| H | 12.85300700 | 9.75423800  | -1.85534100 |
| C | 11.49832500 | 9.98957200  | -0.19765400 |
| H | 10.75046900 | 10.50554800 | -0.79465300 |
| C | 9.99733500  | 12.16858900 | 1.98247300  |
| H | 10.28291100 | 12.52489200 | 0.98698300  |
| H | 10.80643000 | 12.39927600 | 2.68235700  |
| H | 9.09249300  | 12.68575700 | 2.31715400  |

### PMePh<sub>2</sub>

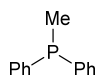

|                   |             |                |             |
|-------------------|-------------|----------------|-------------|
| E                 | =           | -844.755968904 |             |
| G <sub>corr</sub> | =           | 0.18076        |             |
| P                 | -1.19882300 | -0.44166600    | 0.01868500  |
| C                 | -0.58479000 | 0.57761700     | -1.40342600 |
| C                 | -1.47307300 | 0.88000500     | -2.44556800 |
| C                 | 0.74095200  | 1.03645900     | -1.49012200 |
| C                 | -1.04780700 | 1.61868600     | -3.55421100 |
| H                 | -2.50452300 | 0.53933200     | -2.39059700 |
| C                 | 1.16584100  | 1.77564100     | -2.59375900 |
| H                 | 1.43995200  | 0.82193600     | -0.68572200 |
| C                 | 0.27155500  | 2.06731000     | -3.62953000 |
| H                 | -1.74831300 | 1.84574300     | -4.35376400 |
| H                 | 2.19379100  | 2.12549900     | -2.64718800 |
| H                 | 0.60313200  | 2.64495300     | -4.48856200 |
| C                 | -0.11094700 | -1.94065500    | -0.16172500 |
| H                 | 0.95659900  | -1.69504300    | -0.15159400 |
| H                 | -0.32582500 | -2.65911500    | 0.63622400  |
| H                 | -0.35467700 | -2.41836200    | -1.11669300 |
| C                 | -0.41203600 | 0.43923800     | 1.44440300  |
| C                 | -0.68192000 | 1.80931500     | 1.61881300  |
| C                 | 0.37817000  | -0.21224400    | 2.40447600  |
| C                 | -0.16435100 | 2.50833900     | 2.70825600  |
| H                 | -1.29061100 | 2.33641400     | 0.88747400  |
| C                 | 0.89057200  | 0.48787900     | 3.50132300  |
| H                 | 0.60612700  | -1.26938100    | 2.30535400  |
| C                 | 0.62499100  | 1.84896900     | 3.65600200  |
| H                 | -0.37697400 | 3.56885400     | 2.81787500  |
| H                 | 1.50352000  | -0.03450100    | 4.23175200  |
| H                 | 1.02759600  | 2.39243100     | 4.50672700  |

### Ni(PPh<sub>3</sub>)<sub>4</sub>

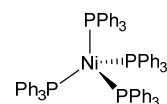

|                   |             |                |             |
|-------------------|-------------|----------------|-------------|
| E                 | =           | -4315.67341777 |             |
| G <sub>corr</sub> | =           | 1.003185       |             |
| Ni                | 9.57524700  | 10.55790800    | 4.18916900  |
| P                 | 9.74169400  | 10.45242400    | 1.90715400  |
| C                 | 8.53392100  | 9.40000600     | 0.95056500  |
| C                 | 7.20132900  | 9.82337500     | 0.79988600  |
| H                 | 6.89640200  | 10.78685300    | 1.18440400  |
| C                 | 6.25769000  | 9.02256900     | 0.15706600  |
| H                 | 5.23780900  | 9.38327400     | 0.05198800  |
| C                 | 6.62110800  | 7.76800900     | -0.34081200 |
| H                 | 5.88574300  | 7.13831900     | -0.83494300 |
| C                 | 7.94071300  | 7.33516500     | -0.20063300 |
| H                 | 8.24142800  | 6.36431300     | -0.58689500 |
| C                 | 8.88900800  | 8.14462200     | 0.43205600  |
| H                 | 9.90641300  | 7.78320700     | 0.52467500  |
| C                 | 11.31920400 | 9.80690200     | 1.15607700  |
| C                 | 12.01138800 | 8.80919800     | 1.85456500  |
| H                 | 11.63893000 | 8.48367200     | 2.81665400  |
| C                 | 13.18271600 | 8.25121600     | 1.33802400  |
| H                 | 13.69565400 | 7.47460600     | 1.89848700  |
| C                 | 13.69371800 | 8.70529500     | 0.12048500  |
| H                 | 14.61294100 | 8.28491400     | -0.27949400 |
| C                 | 13.01786800 | 9.70955000     | -0.58044200 |
| H                 | 13.41079600 | 10.07142800    | -1.52749400 |
| C                 | 11.83410600 | 10.24965300    | -0.07302000 |
| H                 | 11.31931900 | 11.02273100    | -0.63442700 |
| P                 | 7.90869500  | 12.08454900    | 4.60375300  |
| C                 | 6.97656700  | 11.91024700    | 6.22232200  |
| C                 | 6.88228000  | 12.93310200    | 7.18269500  |
| H                 | 7.31152800  | 13.90944800    | 6.99003300  |
| C                 | 6.25293900  | 12.71091800    | 8.41127100  |
| H                 | 6.20299300  | 13.51871200    | 9.13745000  |
| C                 | 5.69101900  | 11.46719100    | 8.70628200  |
| H                 | 5.20030800  | 11.29806500    | 9.66121000  |
| C                 | 5.77500000  | 10.44155000    | 7.76225400  |
| H                 | 5.35677800  | 9.46056600     | 7.97308000  |
| C                 | 6.42212000  | 10.66020000    | 6.54598900  |
| H                 | 6.51146000  | 9.83628500     | 5.85189400  |
| C                 | 8.32641100  | 13.90442000    | 4.67465900  |
| C                 | 7.34002800  | 14.90812400    | 4.64396400  |
| H                 | 6.29121900  | 14.63589600    | 4.57576000  |
| C                 | 7.69125200  | 16.25713400    | 4.69820000  |
| H                 | 6.91390600  | 17.01658900    | 4.66932800  |
| C                 | 9.03637500  | 16.63238700    | 4.78842300  |
| H                 | 9.30839800  | 17.68423300    | 4.82330300  |
| C                 | 10.02332200 | 15.64725600    | 4.83195300  |
| H                 | 11.07418100 | 15.91689600    | 4.89522900  |
| C                 | 9.66225200  | 14.29892500    | 4.77700300  |
| H                 | 10.43170300 | 13.54238500    | 4.79555600  |

|   |             |             |             |   |             |             |             |
|---|-------------|-------------|-------------|---|-------------|-------------|-------------|
| P | 9.10187700  | 8.45462600  | 4.94328600  | H | 15.34521500 | 7.95533000  | 4.20773800  |
| C | 9.97374500  | 7.02050600  | 4.13351700  | H | 15.14255800 | 6.71773000  | 6.36374200  |
| C | 11.29676700 | 6.69449900  | 4.48063700  | C | 9.42454400  | 8.14170800  | 6.74553100  |
| H | 11.78736300 | 7.22239400  | 5.28677400  | C | 9.81648700  | 6.91297100  | 7.30148200  |
| C | 11.99370800 | 5.69473800  | 3.80103500  | C | 9.25062700  | 9.23622200  | 7.60303200  |
| H | 13.01383200 | 5.46341200  | 4.09634500  | C | 10.05284500 | 6.79781600  | 8.67384600  |
| C | 11.38744000 | 5.00530500  | 2.74726100  | H | 9.95408600  | 6.04395800  | 6.66655900  |
| H | 11.93141100 | 4.23191500  | 2.21113600  | C | 9.47351700  | 9.12357200  | 8.97579100  |
| C | 10.07393500 | 5.31864000  | 2.39286200  | H | 8.96115300  | 10.18715200 | 7.17898200  |
| H | 9.58689700  | 4.79020600  | 1.57700700  | C | 9.88614500  | 7.90244800  | 9.51498000  |
| C | 9.37210600  | 6.31123100  | 3.08184400  | H | 10.36998200 | 5.84266000  | 9.08503900  |
| H | 8.35406600  | 6.53522500  | 2.78507200  | H | 9.34460200  | 9.99467800  | 9.61259800  |
| C | 7.35442200  | 7.82605500  | 4.79261100  | H | 10.07844000 | 7.81088800  | 10.58091500 |
| C | 6.56590400  | 8.35981700  | 3.76640200  | C | 6.48936900  | 12.19593500 | 3.38722700  |
| H | 6.97809400  | 9.14523600  | 3.14652200  | C | 6.61037100  | 13.02592700 | 2.25580600  |
| C | 5.26033200  | 7.91190500  | 3.55412700  | C | 5.32206000  | 11.42690900 | 3.51417200  |
| H | 4.67316800  | 8.34023900  | 2.74676800  | C | 5.60321100  | 13.08143200 | 1.29112500  |
| C | 4.71535900  | 6.93488700  | 4.38907000  | H | 7.49205900  | 13.64053000 | 2.12127300  |
| H | 3.69509800  | 6.59157500  | 4.23789500  | C | 4.31812100  | 11.47405100 | 2.54302800  |
| C | 5.48825400  | 6.40381100  | 5.42733500  | H | 5.17790400  | 10.78253500 | 4.37190800  |
| H | 5.06929500  | 5.64623500  | 6.08514700  | C | 4.45220500  | 12.30056100 | 1.42550500  |
| C | 6.80075000  | 6.83822300  | 5.62322200  | H | 5.72903500  | 13.73136000 | 0.42922900  |
| H | 7.38609000  | 6.40840700  | 6.42979600  | H | 3.42636100  | 10.86521600 | 2.66981000  |
| P | 11.56165600 | 11.11721200 | 5.21215000  | H | 3.66982700  | 12.33878100 | 0.67203500  |
| C | 11.52704000 | 11.88361800 | 6.91666400  | C | 9.59224400  | 12.08407300 | 1.03130000  |
| C | 10.32341100 | 12.37309000 | 7.42892500  | C | 10.12815600 | 13.19390900 | 1.69870100  |
| H | 9.42534600  | 12.28275000 | 6.83693400  | C | 8.99379900  | 12.28302700 | -0.22298500 |
| C | 10.25259300 | 12.95785500 | 8.69588900  | C | 10.05685300 | 14.47352900 | 1.14776400  |
| H | 9.29559600  | 13.31534500 | 9.06655500  | H | 10.58464800 | 13.04774900 | 2.66746700  |
| C | 11.40401800 | 13.06460100 | 9.47616200  | C | 8.90993300  | 13.56457300 | -0.77411100 |
| H | 11.35749600 | 13.51271700 | 10.46539100 | H | 8.57724000  | 11.44364000 | -0.76962400 |
| C | 12.62186100 | 12.58935700 | 8.97656200  | C | 9.43619100  | 14.66432600 | -0.08962700 |
| H | 13.52615800 | 12.67256100 | 9.57408400  | H | 10.46668600 | 15.31676300 | 1.69713400  |
| C | 12.68301500 | 12.00708700 | 7.71052800  | H | 8.42976200  | 13.70243600 | -1.73979100 |
| H | 13.63676100 | 11.64539500 | 7.33847100  | H | 9.36191000  | 15.66068600 | -0.51782500 |
| C | 12.66811500 | 12.35812200 | 4.34003800  |   |             |             |             |
| C | 13.06095000 | 13.58249100 | 4.91042000  |   |             |             |             |
| H | 12.78088300 | 13.82963500 | 5.92754100  |   |             |             |             |
| C | 13.79818100 | 14.51607000 | 4.17588100  |   |             |             |             |
| H | 14.07985100 | 15.45699100 | 4.64231800  |   |             |             |             |
| C | 14.17153800 | 14.24704500 | 2.85766100  |   |             |             |             |
| H | 14.74458300 | 14.97470400 | 2.28901000  |   |             |             |             |
| C | 13.79044500 | 13.03563700 | 2.27702600  |   |             |             |             |
| H | 14.05691600 | 12.80788800 | 1.24815700  |   |             |             |             |
| C | 13.03894800 | 12.11417200 | 3.00653800  |   |             |             |             |
| H | 12.71691100 | 11.20727900 | 2.51521500  |   |             |             |             |
| C | 12.77470400 | 9.73859800  | 5.57844900  |   |             |             |             |
| C | 12.67234200 | 9.02908000  | 6.79089700  |   |             |             |             |
| C | 13.75503100 | 9.32878900  | 4.66145700  |   |             |             |             |
| C | 13.51946400 | 7.95640400  | 7.07364600  |   |             |             |             |
| H | 11.93121800 | 9.31088900  | 7.52856400  |   |             |             |             |
| C | 14.59671400 | 8.24846800  | 4.93965300  |   |             |             |             |
| H | 13.88064100 | 9.84720100  | 3.72003100  |   |             |             |             |
| C | 14.48520700 | 7.55562100  | 6.14672900  |   |             |             |             |
| H | 13.41195800 | 7.43014800  | 8.01849700  |   |             |             |             |

### Ni(PPh<sub>3</sub>)<sub>3</sub>

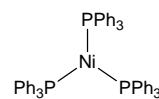

$$E = -3279.08460787$$

$$G_{\text{corr}} = 0.735357$$

|    |            |             |             |
|----|------------|-------------|-------------|
| Ni | 8.54521400 | 10.27566900 | 3.62939900  |
| P  | 9.38890200 | 10.48884300 | 1.65003000  |
| C  | 8.18658000 | 9.78380600  | 0.43371600  |
| C  | 7.92271300 | 10.34415900 | -0.82408100 |
| H  | 8.47227500 | 11.21982600 | -1.15604700 |
| C  | 6.94597000 | 9.78810300  | -1.65629300 |
| H  | 6.74934400 | 10.23612800 | -2.62710400 |
| C  | 6.22433600 | 8.66530600  | -1.24403900 |
| H  | 5.46333800 | 8.23767700  | -1.89158500 |
| C  | 6.48268300 | 8.09636500  | 0.00786100  |
| H  | 5.92197500 | 7.22604400  | 0.33935800  |

|   |             |             |             |   |             |             |             |
|---|-------------|-------------|-------------|---|-------------|-------------|-------------|
| C | 7.45234400  | 8.65417300  | 0.84096400  | C | 6.85867900  | 5.19418900  | 5.88629900  |
| H | 7.63155300  | 8.23339300  | 1.82776900  | H | 7.04496800  | 4.19928600  | 6.28300400  |
| C | 10.95421900 | 9.57189200  | 1.28440000  | C | 7.92557200  | 6.07398400  | 5.69353900  |
| C | 11.96681300 | 9.63308600  | 2.25591000  | H | 8.93530200  | 5.75415900  | 5.93570900  |
| H | 11.78627900 | 10.18183800 | 3.17769100  | C | 9.49035900  | 9.19104500  | 6.60796000  |
| C | 13.18068300 | 8.97590500  | 2.06177000  | C | 9.15024000  | 8.53349200  | 7.79820400  |
| H | 13.95157700 | 9.02601700  | 2.82594400  | C | 10.12710900 | 10.44203400 | 6.68292100  |
| C | 13.39218700 | 8.22808700  | 0.89866800  | C | 9.42787100  | 9.12283600  | 9.03548700  |
| H | 14.33155600 | 7.70108800  | 0.75289100  | H | 8.64633400  | 7.57264300  | 7.76619700  |
| C | 12.38707800 | 8.14981500  | -0.06788800 | C | 10.41070500 | 11.02824700 | 7.91623200  |
| H | 12.54499200 | 7.56717600  | -0.97222400 | H | 10.36122600 | 10.97235700 | 5.76373300  |
| C | 11.17572000 | 8.82289900  | 0.12013500  | C | 10.05458100 | 10.37034500 | 9.09820700  |
| H | 10.40512200 | 8.76466200  | -0.64345800 | H | 9.14678700  | 8.60802200  | 9.95086700  |
| P | 7.12552800  | 11.69629900 | 4.45904400  | H | 10.88627000 | 12.00493100 | 7.95258700  |
| C | 5.92922200  | 11.09785400 | 5.74359900  | H | 10.25847700 | 10.83070800 | 10.06150700 |
| C | 6.42341700  | 10.72140900 | 7.00607600  | C | 5.98866100  | 12.51927900 | 3.24632700  |
| H | 7.46196900  | 10.90828500 | 7.25740000  | C | 5.50258900  | 13.82811000 | 3.37923900  |
| C | 5.59485000  | 10.10256100 | 7.94085900  | C | 5.63781400  | 11.77678700 | 2.10680300  |
| H | 6.00016100  | 9.81771800  | 8.90843700  | C | 4.69013900  | 14.38344000 | 2.38666500  |
| C | 4.25667800  | 9.83790700  | 7.63086500  | H | 5.76615100  | 14.42234700 | 4.24956000  |
| H | 3.61359600  | 9.34584800  | 8.35586500  | C | 4.81384400  | 12.32473000 | 1.12300700  |
| C | 3.75417000  | 10.21040300 | 6.38278400  | H | 6.03854100  | 10.77504400 | 1.98186600  |
| H | 2.71435800  | 10.01452000 | 6.13238900  | C | 4.34270200  | 13.63399200 | 1.25892200  |
| C | 4.58234200  | 10.83829400 | 5.44688300  | H | 4.32960200  | 15.40349300 | 2.49427700  |
| H | 4.17427200  | 11.11504100 | 4.47938700  | H | 4.55973500  | 11.73600100 | 0.24535100  |
| C | 7.96901300  | 13.10545600 | 5.30704800  | H | 3.71394400  | 14.07084000 | 0.48734100  |
| C | 7.40462800  | 13.83818300 | 6.36275200  | C | 9.77915100  | 12.15450300 | 0.92525900  |
| H | 6.41021900  | 13.59240600 | 6.72331500  | C | 10.84143500 | 12.39242300 | 0.03835900  |
| C | 8.11980000  | 14.87532100 | 6.96668500  | C | 8.95482300  | 13.23097300 | 1.29046700  |
| H | 7.67233100  | 15.43154600 | 7.78651200  | C | 11.06987600 | 13.67502300 | -0.46820600 |
| C | 9.40510800  | 15.19616600 | 6.52089800  | H | 11.49410500 | 11.57823800 | -0.26143300 |
| H | 9.96046200  | 16.00159200 | 6.99448000  | C | 9.17501000  | 14.50939300 | 0.77677400  |
| C | 9.97518500  | 14.47485200 | 5.46778700  | H | 8.13720100  | 13.06340300 | 1.98114300  |
| H | 10.97593300 | 14.71580100 | 5.11840900  | C | 10.23740600 | 14.73627700 | -0.10278600 |
| C | 9.26321100  | 13.43406300 | 4.86899100  | H | 11.89927100 | 13.84298000 | -1.15083200 |
| H | 9.70959000  | 12.85636100 | 4.06374600  | H | 8.52114500  | 15.32624400 | 1.07191600  |
| P | 9.05279500  | 8.60018700  | 4.91027800  | H | 10.41792300 | 15.73287300 | -0.49752100 |
| C | 10.45809000 | 7.46459600  | 4.49561900  |   |             |             |             |
| C | 11.59952800 | 7.30476100  | 5.29227400  |   |             |             |             |
| H | 11.68002600 | 7.83072000  | 6.23912600  |   |             |             |             |
| C | 12.64119300 | 6.46592700  | 4.87947700  |   |             |             |             |
| H | 13.52183900 | 6.35387400  | 5.50739300  |   |             |             |             |
| C | 12.54896400 | 5.77083900  | 3.67293200  |   |             |             |             |
| H | 13.35884200 | 5.12047500  | 3.35278900  |   |             |             |             |
| C | 11.41154300 | 5.92359600  | 2.87129700  |   |             |             |             |
| H | 11.33722000 | 5.39708400  | 1.92355700  |   |             |             |             |
| C | 10.38242200 | 6.77021100  | 3.27498400  |   |             |             |             |
| H | 9.51507000  | 6.90500300  | 2.63327800  |   |             |             |             |
| C | 7.70169400  | 7.36439500  | 5.18441600  |   |             |             |             |
| C | 6.39155900  | 7.74437900  | 4.85597900  |   |             |             |             |
| H | 6.21598300  | 8.73364900  | 4.44808400  |   |             |             |             |
| C | 5.32350400  | 6.86586200  | 5.05064400  |   |             |             |             |
| H | 4.31457400  | 7.18151800  | 4.79853400  |   |             |             |             |
| C | 5.55511700  | 5.58925000  | 5.56819600  |   |             |             |             |
| H | 4.72645000  | 4.90202300  | 5.71872600  |   |             |             |             |

  

|                                        |             |                |             |  |  |  |  |
|----------------------------------------|-------------|----------------|-------------|--|--|--|--|
| <b>Ni(PPh<sub>3</sub>)<sub>2</sub></b> |             |                |             |  |  |  |  |
| Ph <sub>3</sub> P—Ni—PPh <sub>3</sub>  |             |                |             |  |  |  |  |
| E                                      | =           | -2242.46752288 |             |  |  |  |  |
| G <sub>corr</sub>                      | =           | 0.477374       |             |  |  |  |  |
| Ni                                     | -1.29396100 | 1.93989600     | -0.01465100 |  |  |  |  |
| P                                      | -2.05630200 | 3.89533300     | -0.39166100 |  |  |  |  |
| C                                      | -2.90685900 | 4.68036000     | 1.04850900  |  |  |  |  |
| C                                      | -2.92276700 | 6.06035900     | 1.30058700  |  |  |  |  |
| H                                      | -2.40181000 | 6.74269100     | 0.63516600  |  |  |  |  |
| C                                      | -3.60553500 | 6.56620100     | 2.41017600  |  |  |  |  |
| H                                      | -3.60949100 | 7.63690600     | 2.59783800  |  |  |  |  |
| C                                      | -4.27870200 | 5.70093400     | 3.27677500  |  |  |  |  |
| H                                      | -4.80640700 | 6.09736800     | 4.14033600  |  |  |  |  |
| C                                      | -4.26366600 | 4.32376000     | 3.03557600  |  |  |  |  |
| H                                      | -4.77761800 | 3.64491300     | 3.71121400  |  |  |  |  |

|   |             |             |             |
|---|-------------|-------------|-------------|
| C | -3.57601800 | 3.81677800  | 1.93231600  |
| H | -3.54156300 | 2.74450000  | 1.74904300  |
| C | -0.78470300 | 5.13978400  | -0.88779800 |
| C | -1.04785300 | 6.24955800  | -1.70535000 |
| H | -2.04718800 | 6.41224100  | -2.09864200 |
| C | -0.02687200 | 7.14952800  | -2.02181100 |
| H | -0.24123400 | 8.00564900  | -2.65643800 |
| C | 1.26493800  | 6.95041900  | -1.52691400 |
| H | 2.05764200  | 7.65051300  | -1.77757200 |
| C | 1.53733600  | 5.84367400  | -0.71733100 |
| H | 2.54230200  | 5.67831000  | -0.33770000 |
| C | 0.51954000  | 4.94131000  | -0.40474100 |
| H | 0.72737100  | 4.06599400  | 0.20767900  |
| P | -0.47832600 | 0.01037100  | 0.38061300  |
| C | 1.09461800  | -0.35527400 | -0.51672900 |
| C | 2.10583800  | -1.19260200 | -0.02196100 |
| H | 1.99775700  | -1.66135400 | 0.95189900  |
| C | 3.25894700  | -1.42675100 | -0.77584300 |
| H | 4.03668800  | -2.07642000 | -0.38248100 |
| C | 3.41365400  | -0.82803100 | -2.02913600 |
| H | 4.31276800  | -1.01033300 | -2.61200500 |
| C | 2.41368000  | 0.01287200  | -2.52683800 |
| H | 2.53273900  | 0.48932800  | -3.49655900 |
| C | 1.26451500  | 0.25246300  | -1.77215600 |
| H | 0.49088800  | 0.92178200  | -2.14355500 |
| C | -1.57299200 | -1.41201000 | -0.05621600 |
| C | -2.95735100 | -1.20192800 | 0.06102500  |
| H | -3.31827600 | -0.22294300 | 0.37062900  |
| C | -3.85786300 | -2.22858500 | -0.22596000 |
| H | -4.92633800 | -2.05308900 | -0.13074200 |
| C | -3.38482500 | -3.47489800 | -0.64777600 |
| H | -4.08451000 | -4.27356600 | -0.87978800 |
| C | -2.01011300 | -3.68896200 | -0.77922500 |
| H | -1.63877000 | -4.65463100 | -1.11278900 |
| C | -1.10687800 | -2.66398200 | -0.48463500 |
| H | -0.04054000 | -2.84177500 | -0.59080400 |
| C | -0.05242300 | -0.30101200 | 2.15104400  |
| C | -0.08176900 | -1.56651100 | 2.75636800  |
| C | 0.32370900  | 0.81441600  | 2.91803000  |
| C | 0.27180400  | -1.71296900 | 4.10040400  |
| H | -0.38169000 | -2.43866600 | 2.18255000  |
| C | 0.68179500  | 0.66609100  | 4.25867400  |
| H | 0.32171400  | 1.79866900  | 2.45368900  |
| C | 0.65626500  | -0.59946600 | 4.85234500  |
| H | 0.24485100  | -2.69764900 | 4.56008100  |
| H | 0.97050500  | 1.53730500  | 4.84100100  |
| H | 0.92793100  | -0.71650200 | 5.89823700  |
| C | -3.31162200 | 3.99829400  | -1.74319100 |
| C | -3.18790800 | 3.07364400  | -2.79387100 |
| C | -4.35815000 | 4.93237500  | -1.77651500 |
| C | -4.08031700 | 3.09473600  | -3.86658700 |
| H | -2.39165800 | 2.33260200  | -2.75441900 |
| C | -5.25489300 | 4.94829200  | -2.84821400 |
| H | -4.47739400 | 5.64674900  | -0.96685400 |
| C | -5.11664300 | 4.03286300  | -3.89504300 |

|   |             |            |             |
|---|-------------|------------|-------------|
| H | -3.97364100 | 2.37372500 | -4.67299100 |
| H | -6.06270100 | 5.67563100 | -2.86345100 |
| H | -5.81779200 | 4.04572700 | -4.72549300 |

### Ni(PPh<sub>3</sub>)

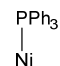

|                   |             |                |             |
|-------------------|-------------|----------------|-------------|
| E                 | =           | -1205.85045751 |             |
| G <sub>corr</sub> | =           | 0.227205       |             |
| Ni                | 9.72302200  | 9.91145400     | 3.80698600  |
| P                 | 9.17286800  | 8.33567900     | 4.96691400  |
| C                 | 10.27997700 | 6.85324400     | 4.86740700  |
| C                 | 10.52040500 | 5.98916200     | 5.94704100  |
| H                 | 10.05690100 | 6.17664400     | 6.91123100  |
| C                 | 11.35824500 | 4.88131700     | 5.79150200  |
| H                 | 11.53901600 | 4.22090100     | 6.63581900  |
| C                 | 11.96302800 | 4.62358500     | 4.55864900  |
| H                 | 12.61647000 | 3.76302300     | 4.44145500  |
| C                 | 11.73081900 | 5.48040000     | 3.47834600  |
| H                 | 12.20361500 | 5.28951000     | 2.51834800  |
| C                 | 10.89974700 | 6.59022700     | 3.63475500  |
| H                 | 10.73004800 | 7.27163600     | 2.80367600  |
| C                 | 7.49495200  | 7.63416900     | 4.61273500  |
| C                 | 6.49773300  | 8.52910500     | 4.19112600  |
| H                 | 6.75282300  | 9.57855900     | 4.05934100  |
| C                 | 5.20162400  | 8.08098700     | 3.93428700  |
| H                 | 4.43993700  | 8.78527700     | 3.60985700  |
| C                 | 4.88819000  | 6.72655400     | 4.08374700  |
| H                 | 3.88095300  | 6.37408500     | 3.87726900  |
| C                 | 5.87569200  | 5.82648700     | 4.49202900  |
| H                 | 5.63857700  | 4.77158100     | 4.60460100  |
| C                 | 7.17252900  | 6.27593400     | 4.75609500  |
| H                 | 7.92975400  | 5.56547400     | 5.07393300  |
| C                 | 9.10847500  | 8.68008700     | 6.78649000  |
| C                 | 8.16461000  | 8.11119900     | 7.65485400  |
| C                 | 10.07543400 | 9.55374800     | 7.31125700  |
| C                 | 8.19490600  | 8.40486400     | 9.02127000  |
| H                 | 7.40390300  | 7.43827000     | 7.27069200  |
| C                 | 10.11028500 | 9.83975800     | 8.67626800  |
| H                 | 10.79406500 | 10.01296300    | 6.63552100  |
| C                 | 9.16763900  | 9.26571500     | 9.53510200  |
| H                 | 7.45646400  | 7.95970600     | 9.68329900  |
| H                 | 10.86568000 | 10.51605800    | 9.06806900  |
| H                 | 9.18775600  | 9.49345700     | 10.59765400 |

### PPh<sub>3</sub>

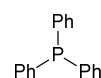

|                   |             |                |             |
|-------------------|-------------|----------------|-------------|
| E                 | =           | -1036.54805321 |             |
| G <sub>corr</sub> | =           | 0.228088       |             |
| P                 | -1.33822500 | -0.20916800    | -0.01106700 |

|   |             |             |             |
|---|-------------|-------------|-------------|
| C | -0.49056200 | 0.65826200  | -1.41058800 |
| C | -1.08786100 | 0.55928300  | -2.67884800 |
| C | 0.69563800  | 1.39704900  | -1.27931000 |
| C | -0.50573100 | 1.16860500  | -3.79121200 |
| H | -2.01393800 | 0.00067700  | -2.79755200 |
| C | 1.27202100  | 2.01620100  | -2.39123900 |
| H | 1.17486600  | 1.48781200  | -0.30911600 |
| C | 0.67555600  | 1.90154900  | -3.64912000 |
| H | -0.97867100 | 1.07815100  | -4.76575700 |
| H | 2.19061600  | 2.58559000  | -2.27346300 |
| H | 1.12616600  | 2.38348700  | -4.51284000 |
| C | -0.49628800 | 0.52031500  | 1.46812700  |
| C | -1.04301600 | 1.70211100  | 1.99702100  |
| C | 0.63639000  | -0.03333400 | 2.08465800  |
| C | -0.46285700 | 2.32381300  | 3.10358200  |
| H | -1.92782100 | 2.13988000  | 1.53963200  |
| C | 1.21042300  | 0.58344600  | 3.19898000  |
| H | 1.07550200  | -0.94690200 | 1.69537000  |
| C | 0.66520500  | 1.76377900  | 3.70925100  |
| H | -0.89603700 | 3.23968000  | 3.49746900  |
| H | 2.08692800  | 0.14131200  | 3.66611400  |
| H | 1.11355500  | 2.24207700  | 4.57619200  |
| C | -0.59117500 | -1.90143100 | -0.09580600 |
| C | -1.25582700 | -2.93147000 | 0.59084300  |
| C | 0.58661200  | -2.20728600 | -0.79589000 |
| C | -0.74787500 | -4.23162000 | 0.59154200  |
| H | -2.17622700 | -2.71534000 | 1.12918700  |
| C | 1.08920600  | -3.51047700 | -0.80332800 |
| H | 1.11558700  | -1.42673100 | -1.33446600 |
| C | 0.42562400  | -4.52450000 | -0.10823000 |
| H | -1.27204200 | -5.01638400 | 1.13092100  |
| H | 2.00170300  | -3.73212600 | -1.35122300 |
| H | 0.81808800  | -5.53801100 | -0.11533000 |

### Phi

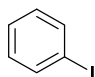

|                   |            |                |             |
|-------------------|------------|----------------|-------------|
| E                 | =          | -243.107736972 |             |
| G <sub>corr</sub> | =          | 0.058614       |             |
| C                 | 2.37152000 | -0.21742400    | 0.00004400  |
| C                 | 3.76861100 | -0.23321200    | 0.00051100  |
| C                 | 4.46008500 | 0.98167600     | -0.00005500 |
| C                 | 3.76413600 | 2.19271900     | -0.00103700 |
| C                 | 2.36729000 | 2.19055000     | -0.00148300 |
| C                 | 1.65935800 | 0.98487600     | -0.00095000 |
| H                 | 4.31214000 | -1.17186400    | 0.00128900  |
| H                 | 5.54689700 | 0.97369200     | 0.00029800  |
| H                 | 4.30771100 | 3.13330800     | -0.00147300 |
| H                 | 1.81823800 | 3.12843600     | -0.00226000 |
| H                 | 0.57433100 | 0.98727300     | -0.00129000 |
| I                 | 1.31057300 | -2.06376000    | 0.00090600  |

### PhBr

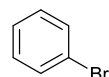

|                   |             |                |             |
|-------------------|-------------|----------------|-------------|
| E                 | =           | -244.896841005 |             |
| G <sub>corr</sub> | =           | 0.059764       |             |
| C                 | -0.85796100 | 0.70377900     | 0.00009600  |
| C                 | 0.53709300  | 0.72585000     | 0.00058500  |
| C                 | 1.25386900  | 1.92286100     | -0.00001800 |
| C                 | 0.54635900  | 3.12815400     | -0.00104900 |
| C                 | -0.85051400 | 3.13003500     | -0.00149500 |
| C                 | -1.54762700 | 1.91946500     | -0.00096300 |
| H                 | -1.39816700 | -0.23693400    | 0.00054500  |
| H                 | 2.33857700  | 1.91999100     | 0.00033700  |
| H                 | 1.09606600  | 4.06534300     | -0.00150300 |
| H                 | -1.39348900 | 4.07076600     | -0.00228700 |
| H                 | -2.63418700 | 1.91251600     | -0.00132300 |
| Br                | 1.50685400  | -0.95204800    | 0.00213300  |

### PhCl

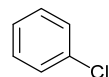

|                   |             |                |             |
|-------------------|-------------|----------------|-------------|
| E                 | =           | -691.950425949 |             |
| G <sub>corr</sub> | =           | 0.061491       |             |
| C                 | -0.85716900 | 0.70386000     | 0.00011200  |
| C                 | 0.53709400  | 0.72607000     | 0.00061000  |
| C                 | 1.25354400  | 1.92236600     | -0.00000700 |
| C                 | 0.54680700  | 3.12722500     | -0.00104300 |
| C                 | -0.84999300 | 3.12910400     | -0.00148800 |
| C                 | -1.54697700 | 1.91855900     | -0.00096300 |
| H                 | -1.39124900 | -0.24059900    | 0.00055500  |
| H                 | 2.33849700  | 1.91237000     | 0.00034100  |
| H                 | 1.09591200  | 4.06475600     | -0.00151000 |
| H                 | -1.39301300 | 4.06980900     | -0.00229500 |
| H                 | -2.63353100 | 1.91212000     | -0.00133500 |
| Cl                | 1.42199500  | -0.80593300    | 0.00190100  |

### PhH

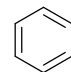

|                   |             |                |             |
|-------------------|-------------|----------------|-------------|
| E                 | =           | -232.324141291 |             |
| G <sub>corr</sub> | =           | 0.073358       |             |
| C                 | -0.58967400 | 0.46982000     | 0.00007300  |
| C                 | 0.80830200  | 0.46978900     | 0.00059400  |
| C                 | 1.50730200  | 1.68026600     | -0.00009700 |
| C                 | 0.80833000  | 2.89101300     | -0.00101000 |
| C                 | -0.58944100 | 2.89104200     | -0.00141100 |
| C                 | -1.28854600 | 1.68039600     | -0.00099600 |
| H                 | -1.13306100 | -0.47145200    | 0.00044300  |
| H                 | 1.35156700  | -0.47156400    | 0.00138300  |



|   |             |            |             |
|---|-------------|------------|-------------|
| H | 2.59421000  | 1.68036700 | 0.00014600  |
| H | 1.35195200  | 3.83214100 | -0.00144800 |
| H | -1.13292200 | 3.83226200 | -0.00224200 |
| H | -2.37546200 | 1.68056300 | -0.00134700 |

### Ph•

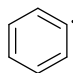

|                   |             |                |             |
|-------------------|-------------|----------------|-------------|
| E                 | =           | -231.634164717 |             |
| G <sub>corr</sub> | =           | 0.059620       |             |
| C                 | 1.08864700  | -0.03769400    | 0.00006900  |
| C                 | 2.48722700  | -0.02963100    | 0.00046900  |
| C                 | 3.19370500  | 1.17742900     | -0.00006000 |
| C                 | 2.50180800  | 2.40134400     | -0.00094100 |
| C                 | 1.12511300  | 2.33009200     | -0.00131600 |
| C                 | 0.37481100  | 1.17352800     | -0.00088100 |
| H                 | 0.54648100  | -0.98062200    | 0.00048300  |
| H                 | 3.03049000  | -0.97076800    | 0.00119500  |
| H                 | 4.28145500  | 1.17540900     | 0.00024800  |
| H                 | 3.03893100  | 3.34652400     | -0.00135700 |
| H                 | -0.71237300 | 1.18106900     | -0.00119200 |

### THF

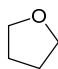

|                   |             |                |             |
|-------------------|-------------|----------------|-------------|
| E                 | =           | -232.533046146 |             |
| G <sub>corr</sub> | =           | 0.089224       |             |
| C                 | -1.56230200 | -0.45607500    | -0.24398700 |
| O                 | -0.20588500 | -0.90584700    | -0.08615900 |
| C                 | 0.64395600  | 0.21838200     | 0.19170000  |
| C                 | -0.17133000 | 1.46792000     | -0.15074900 |
| C                 | -1.59214100 | 1.00795700     | 0.20704100  |
| H                 | -1.85390200 | -0.55044800    | -1.30149300 |
| H                 | -2.22154100 | -1.10312100    | 0.34786000  |
| H                 | 0.92674500  | 0.21260800     | 1.25650900  |
| H                 | 1.56037900  | 0.12037000     | -0.40278100 |
| H                 | 0.15644900  | 2.35268300     | 0.40361300  |
| H                 | -0.10111600 | 1.68671800     | -1.22326500 |
| H                 | -1.74999800 | 1.07166800     | 1.29050300  |
| H                 | -2.37879700 | 1.58492900     | -0.28879800 |

### THF radical

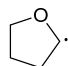

|                   |             |                |             |
|-------------------|-------------|----------------|-------------|
| E                 | =           | -231.874382497 |             |
| G <sub>corr</sub> | =           | 0.075589       |             |
| C                 | -1.24722000 | -0.70316900    | 0.08386900  |
| O                 | 0.10174200  | -0.69340000    | -0.43563800 |
| C                 | 0.60453000  | 0.57802300     | -0.27297400 |

|   |             |             |             |
|---|-------------|-------------|-------------|
| C | -0.47918200 | 1.56038500  | 0.07988100  |
| C | -1.76070900 | 0.72121600  | -0.13708100 |
| H | -1.80208700 | -1.47616200 | -0.45435600 |
| H | -1.22033300 | -0.96284000 | 1.15191900  |
| H | 1.46881700  | 0.78697400  | -0.89743500 |
| H | -0.40745000 | 1.88985200  | 1.12873600  |
| H | -0.45368500 | 2.46651100  | -0.53792000 |
| H | -2.57654100 | 0.98252500  | 0.54294400  |
| H | -2.11662300 | 0.83286300  | -1.16731300 |

### H Abstraction TS: Ph• + THF

|                   |             |                          |             |
|-------------------|-------------|--------------------------|-------------|
| E                 | =           | -464.165098393           |             |
| G <sub>corr</sub> | =           | 0.161901                 |             |
| v                 | =           | -902.54 cm <sup>-1</sup> |             |
| C                 | -1.83225600 | 0.60865000               | 0.00283100  |
| C                 | -0.48010100 | 0.98016900               | -0.00381900 |
| C                 | -0.06053200 | 1.94830700               | -0.90496600 |
| C                 | -0.92424800 | 2.55791900               | -1.80434300 |
| C                 | -2.27557300 | 2.18081000               | -1.79230100 |
| C                 | -2.72469000 | 1.20981800               | -0.89097300 |
| H                 | -2.18644900 | -0.14621200              | 0.70168700  |
| H                 | 0.22898300  | 0.52288900               | 0.68344600  |
| H                 | -0.57330500 | 3.31260600               | -2.50566400 |
| H                 | -2.97413600 | 2.64468700               | -2.48567200 |
| H                 | -3.77274300 | 0.92112300               | -0.88592900 |
| C                 | 2.66362800  | 2.10019400               | -0.67812000 |
| O                 | 2.88774700  | 1.06445200               | 0.24846100  |
| C                 | 3.26725100  | 1.66796600               | -2.00501800 |
| H                 | 2.99522800  | 3.05639800               | -0.25961800 |
| C                 | 3.21888000  | -0.15140200              | -0.46370300 |
| C                 | 3.01532100  | 0.15209900               | -1.95241100 |
| H                 | 4.34358300  | 1.88664200               | -2.02737600 |
| H                 | 2.79627000  | 2.15951200               | -2.86190900 |
| H                 | 4.26483000  | -0.40086100              | -0.23909900 |
| H                 | 2.58177700  | -0.96078400              | -0.09203600 |
| H                 | 3.68703000  | -0.42773700              | -2.59177300 |
| H                 | 1.98207700  | -0.06356900              | -2.24658200 |
| H                 | 1.44807700  | 2.19700900               | -0.83631200 |

### 1-I-PMe<sub>3</sub>

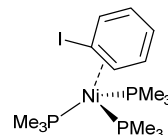

|                   |             |                |             |
|-------------------|-------------|----------------|-------------|
| E                 | =           | -1796.04683539 |             |
| G <sub>corr</sub> | =           | 0.375599       |             |
| Ni                | -1.26811300 | -0.67801000    | 0.33288100  |
| P                 | -0.49691400 | 0.41599500     | -1.42677400 |
| P                 | -0.41998400 | -2.74211900    | 0.27898300  |
| P                 | -3.49275500 | -0.79442200    | 0.14759700  |

|   |             |             |             |
|---|-------------|-------------|-------------|
| C | -0.64408300 | 0.70753700  | 1.96746700  |
| C | -1.43510000 | -0.15462000 | 2.77493900  |
| C | 0.77285400  | 0.58287800  | 2.01858100  |
| C | -0.80473100 | -1.08237600 | 3.63381500  |
| H | -2.50027000 | 0.01709800  | 2.86637800  |
| C | 1.36575400  | -0.35677900 | 2.85141500  |
| H | 1.38897500  | 1.24783800  | 1.42518800  |
| C | 0.57874000  | -1.17944500 | 3.68269300  |
| H | -1.42471600 | -1.70667100 | 4.27268900  |
| H | 2.44965400  | -0.44156600 | 2.86805400  |
| H | 1.05553600  | -1.88671900 | 4.35609900  |
| C | -4.44285100 | -1.96379800 | 1.23501200  |
| H | -4.31838800 | -1.67142100 | 2.28393600  |
| H | -5.51466100 | -1.97781700 | 0.99779000  |
| H | -4.04021300 | -2.97649400 | 1.12037700  |
| C | -4.55024100 | 0.72065100  | 0.33101800  |
| H | -5.60908300 | 0.50714600  | 0.13461100  |
| H | -4.45141200 | 1.12019800  | 1.34613800  |
| H | -4.20507200 | 1.49143700  | -0.36561900 |
| C | -4.06364300 | -1.38104300 | -1.51866500 |
| H | -3.70743500 | -0.69010600 | -2.28984300 |
| H | -3.63621700 | -2.36768700 | -1.72659400 |
| H | -5.15755600 | -1.44600900 | -1.58054600 |
| C | -0.18396800 | -0.62762500 | -2.92948400 |
| H | 0.13470400  | -0.01997800 | -3.78578200 |
| H | 0.59583300  | -1.36531700 | -2.71329900 |
| H | -1.10093600 | -1.16298900 | -3.19888300 |
| C | -1.59011300 | 1.71185300  | -2.18656800 |
| H | -2.55887100 | 1.27203900  | -2.44554400 |
| H | -1.76238100 | 2.51509000  | -1.46391700 |
| H | -1.14299300 | 2.13825000  | -3.09378500 |
| C | 1.09278500  | 1.36990000  | -1.36062900 |
| H | 1.90379000  | 0.71876700  | -1.01796100 |
| H | 1.35532600  | 1.78287000  | -2.34264900 |
| H | 0.98995900  | 2.19729100  | -0.65083400 |
| C | 1.41910900  | -2.93097500 | 0.10034900  |
| H | 1.91456100  | -2.44982700 | 0.95030800  |
| H | 1.72830400  | -3.98326700 | 0.05299600  |
| H | 1.74728500  | -2.42204500 | -0.81304900 |
| C | -0.99013200 | -3.80969500 | -1.13128200 |
| H | -0.83253600 | -3.29833400 | -2.08530700 |
| H | -0.45659100 | -4.76855400 | -1.15139400 |
| H | -2.06214400 | -4.00908500 | -1.02617500 |
| C | -0.72381800 | -3.92968800 | 1.67408700  |
| H | -0.23573200 | -3.56738300 | 2.58242500  |
| H | -1.80025700 | -3.99008500 | 1.86934400  |
| H | -0.34350600 | -4.93215800 | 1.43972700  |
| I | -1.40257900 | 2.78205300  | 1.67982500  |

### 1-I-PMe<sub>2</sub>Ph

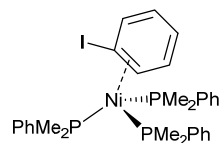

|                   |             |                |             |
|-------------------|-------------|----------------|-------------|
| E                 | =           | -2371.43853795 |             |
| G <sub>corr</sub> | =           | 0.523498       |             |
| Ni                | -0.35032100 | 0.73709900     | -0.43214600 |
| P                 | 0.16086700  | 0.76725700     | -2.56401900 |
| P                 | 1.52361900  | 0.77784700     | 0.71676800  |
| P                 | -1.92677800 | 2.20872300     | -0.01240900 |
| C                 | 1.64705600  | 1.80645500     | -2.91943100 |
| C                 | 1.55014700  | 3.20056600     | -2.75606700 |
| H                 | 0.59812900  | 3.65163100     | -2.49669800 |
| C                 | 2.67124900  | 4.01802000     | -2.89440200 |
| H                 | 2.56899100  | 5.09189600     | -2.75947000 |
| C                 | 3.91999600  | 3.45908300     | -3.18594600 |
| H                 | 4.79647700  | 4.09438700     | -3.28376700 |
| C                 | 4.03131600  | 2.07634100     | -3.34794900 |
| H                 | 4.99629300  | 1.62985100     | -3.57590100 |
| C                 | 2.90440000  | 1.25734800     | -3.22021600 |
| H                 | 3.01860300  | 0.18520700     | -3.35079600 |
| C                 | -1.04503600 | 1.47237300     | -3.79352400 |
| H                 | -1.97498400 | 0.89634900     | -3.73689100 |
| H                 | -0.66101200 | 1.43668400     | -4.82028600 |
| H                 | -1.27236600 | 2.51052700     | -3.53613700 |
| C                 | 0.56377900  | -0.81857500    | -3.44410500 |
| H                 | -0.34874000 | -1.42365800    | -3.48017800 |
| H                 | 1.32109800  | -1.38613100    | -2.89429600 |
| H                 | 0.91381500  | -0.65232700    | -4.46955800 |
| C                 | 1.47031600  | 0.70449100     | 2.56692400  |
| C                 | 0.99771500  | 1.82851200     | 3.26934800  |
| H                 | 0.72377400  | 2.72690500     | 2.72300700  |
| C                 | 0.86984600  | 1.81104300     | 4.65697700  |
| H                 | 0.50797200  | 2.69504900     | 5.17660100  |
| C                 | 1.20289100  | 0.65908000     | 5.37914100  |
| H                 | 1.10159000  | 0.64230600     | 6.46120900  |
| C                 | 1.66855300  | -0.46575100    | 4.69709200  |
| H                 | 1.93096300  | -1.36636700    | 5.24705900  |
| C                 | 1.80340800  | -0.44295100    | 3.30471100  |
| H                 | 2.17199300  | -1.33165200    | 2.80099000  |
| C                 | 2.68606800  | -0.61186000    | 0.30687500  |
| H                 | 2.17501900  | -1.57631700    | 0.39735200  |
| H                 | 3.59218300  | -0.62362900    | 0.92488500  |
| H                 | 2.97661400  | -0.48381500    | -0.74153000 |
| C                 | 2.68389800  | 2.20902400     | 0.48222200  |
| H                 | 2.17087300  | 3.15214600     | 0.68333500  |
| H                 | 3.01597700  | 2.22275700     | -0.55862500 |
| H                 | 3.55831900  | 2.12430800     | 1.13764300  |
| C                 | -1.34121200 | 3.89718700     | -0.49873500 |
| C                 | -1.79039800 | 4.56104500     | -1.65241900 |
| H                 | -2.57692700 | 4.12948400     | -2.26316200 |
| C                 | -1.23035900 | 5.78235400     | -2.04362700 |

|   |             |             |             |
|---|-------------|-------------|-------------|
| H | -1.58889700 | 6.27200000  | -2.94581300 |
| C | -0.21855500 | 6.37054100  | -1.28251800 |
| H | 0.21793500  | 7.31789100  | -1.58779600 |
| C | 0.22404700  | 5.73076800  | -0.11926700 |
| H | 1.00577500  | 6.18142500  | 0.48729900  |
| C | -0.32937800 | 4.50921300  | 0.26267200  |
| H | 0.03515400  | 4.01999300  | 1.16074000  |
| C | -2.56023300 | 2.55145100  | 1.70302700  |
| H | -3.16139800 | 1.69462900  | 2.02100300  |
| H | -3.17768500 | 3.45677000  | 1.74241400  |
| H | -1.72389400 | 2.64794700  | 2.40033600  |
| C | -3.56797400 | 2.12295400  | -0.88088300 |
| H | -4.11114200 | 1.26490700  | -0.47568600 |
| H | -3.42880700 | 1.95085000  | -1.95226200 |
| H | -4.17015100 | 3.02699800  | -0.73014700 |
| C | -2.28197500 | -1.10316800 | 1.60960400  |
| C | -1.07563200 | -1.29893500 | 0.90662100  |
| H | -0.14760600 | -1.41542200 | 1.45002800  |
| C | -1.12880100 | -1.54786500 | -0.47938200 |
| H | -0.23219700 | -1.87209100 | -0.99545300 |
| C | -3.51297300 | -1.13588200 | 0.96595500  |
| H | -4.43465300 | -0.98387400 | 1.51838500  |
| C | -2.37684500 | -1.57399200 | -1.13676300 |
| H | -2.41387100 | -1.77764700 | -2.20350700 |
| C | -3.55122000 | -1.37210500 | -0.42165700 |
| H | -4.51245900 | -1.39831500 | -0.92794400 |
| I | -2.18505600 | -0.77562200 | 3.70614600  |

### 1-I-PMePh<sub>2</sub>

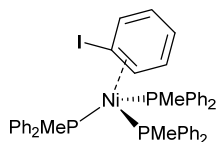

$$E = -2946.82558215$$

$$G_{\text{corr}} = 0.672645$$

|    |             |             |            |
|----|-------------|-------------|------------|
| Ni | 9.04923100  | 10.20978200 | 3.67887300 |
| P  | 9.98827100  | 8.32627800  | 3.17714500 |
| C  | 8.57157600  | 7.26872400  | 2.62356400 |
| C  | 7.91661900  | 7.63090000  | 1.43129600 |
| H  | 8.30874800  | 8.44661000  | 0.82992200 |
| C  | 6.75413400  | 6.97580600  | 1.02412600 |
| H  | 6.26337400  | 7.27272200  | 0.10054500 |
| C  | 6.21527600  | 5.94909200  | 1.80751700 |
| H  | 5.30478500  | 5.44353400  | 1.49676600 |
| C  | 6.85773700  | 5.57888000  | 2.99101900 |
| H  | 6.44874800  | 4.78166300  | 3.60692100 |
| C  | 8.02734700  | 6.23020200  | 3.39475200 |
| H  | 8.50799600  | 5.93470000  | 4.32132700 |
| C  | 10.80532800 | 7.33522500  | 4.51081100 |
| C  | 11.01768200 | 7.96515900  | 5.74395500 |
| H  | 10.68944200 | 8.99062500  | 5.86975200 |
| C  | 11.63762300 | 7.29054600  | 6.79794200 |
| H  | 11.78943500 | 7.80051300  | 7.74496900 |

|   |             |             |             |
|---|-------------|-------------|-------------|
| C | 12.04896600 | 5.96701900  | 6.62976700  |
| H | 12.52642300 | 5.43473500  | 7.44873000  |
| C | 11.84241500 | 5.32436500  | 5.40366500  |
| H | 12.15841900 | 4.29262100  | 5.26963700  |
| C | 11.22964700 | 6.00523800  | 4.35007700  |
| H | 11.06626800 | 5.49097000  | 3.40627400  |
| C | 11.18765000 | 8.03686400  | 1.77884300  |
| H | 11.42885000 | 6.97645600  | 1.64773800  |
| H | 12.10932700 | 8.58955700  | 1.98542400  |
| H | 10.75477700 | 8.41505700  | 0.84782200  |
| P | 8.38601300  | 11.73082900 | 2.29075000  |
| C | 7.86668600  | 13.29304100 | 3.13344900  |
| C | 8.85105000  | 14.17331800 | 3.62054200  |
| H | 9.89683600  | 14.00190300 | 3.37799600  |
| C | 8.50598000  | 15.26615200 | 4.41506300  |
| H | 9.28251200  | 15.93513200 | 4.77788100  |
| C | 7.16666300  | 15.49935800 | 4.74796400  |
| H | 6.89738100  | 16.34677600 | 5.37287100  |
| C | 6.18019500  | 14.63452700 | 4.26977800  |
| H | 5.13617500  | 14.80456000 | 4.52147000  |
| C | 6.52569800  | 13.54214600 | 3.46781300  |
| H | 5.74048100  | 12.87777700 | 3.12172800  |
| C | 9.46484600  | 12.38235000 | 0.92430700  |
| C | 9.19719600  | 13.58067500 | 0.24282200  |
| H | 8.34947900  | 14.19381700 | 0.53824000  |
| C | 10.01683400 | 13.99710800 | -0.80808500 |
| H | 9.80092300  | 14.92844600 | -1.32598000 |
| C | 11.11364400 | 13.21939000 | -1.19538600 |
| H | 11.75166700 | 13.54671000 | -2.01231600 |
| C | 11.38756100 | 12.02460400 | -0.52573300 |
| H | 12.24111200 | 11.41711800 | -0.81699900 |
| C | 10.56864200 | 11.61367200 | 0.52967900  |
| H | 10.78860400 | 10.69979700 | 1.07263500  |
| C | 6.88162700  | 11.30376900 | 1.28568700  |
| H | 6.50846500  | 12.16966600 | 0.72778200  |
| H | 6.09078700  | 10.90929400 | 1.92784800  |
| H | 7.16398100  | 10.51886900 | 0.57751600  |
| P | 7.89934200  | 10.37870700 | 5.52668400  |
| C | 8.00635100  | 9.06598800  | 6.83727500  |
| C | 8.61838700  | 9.28435900  | 8.08072400  |
| H | 8.96158100  | 10.27465700 | 8.35895600  |
| C | 8.81913700  | 8.22740600  | 8.97501500  |
| H | 9.30678100  | 8.41837000  | 9.92818700  |
| C | 8.40078500  | 6.93648400  | 8.64858500  |
| H | 8.56173300  | 6.11527500  | 9.34207600  |
| C | 7.77034900  | 6.71062500  | 7.42030600  |
| H | 7.43357100  | 5.71138000  | 7.15459700  |
| C | 7.58114600  | 7.76236300  | 6.52558000  |
| H | 7.10526300  | 7.56444800  | 5.57071000  |
| C | 6.10078500  | 10.28403300 | 5.09139800  |
| C | 5.72931900  | 9.40176000  | 4.06124400  |
| H | 6.49803300  | 8.82777500  | 3.55109000  |
| C | 4.39566600  | 9.28018300  | 3.66751800  |
| H | 4.13264700  | 8.58766800  | 2.87199600  |
| C | 3.41125900  | 10.06029900 | 4.28164800  |

|   |             |             |            |
|---|-------------|-------------|------------|
| H | 2.37340000  | 9.97816100  | 3.96912900 |
| C | 3.77027100  | 10.95100800 | 5.29677300 |
| H | 3.01127700  | 11.56416400 | 5.77657600 |
| C | 5.10339800  | 11.05725200 | 5.70460500 |
| H | 5.35575400  | 11.75277400 | 6.49872700 |
| C | 8.01354000  | 11.92949200 | 6.53352100 |
| H | 7.39656800  | 11.90761000 | 7.43812300 |
| H | 7.71196700  | 12.77387000 | 5.90852800 |
| H | 9.05661500  | 12.07904200 | 6.82747500 |
| C | 11.65939000 | 11.83205200 | 5.04466600 |
| H | 10.82778400 | 12.43810800 | 5.38471300 |
| C | 12.46186900 | 11.12509300 | 5.94343400 |
| C | 13.52787000 | 10.33646900 | 5.50301700 |
| H | 14.13469500 | 9.77991400  | 6.20901900 |
| C | 11.95078100 | 11.75449600 | 3.67927300 |
| H | 11.34252300 | 12.30806200 | 2.97559900 |
| C | 13.01813800 | 10.97920800 | 3.22132500 |
| H | 13.23218200 | 10.93013900 | 2.15764700 |
| C | 13.80026300 | 10.26774600 | 4.13331800 |
| H | 14.62856800 | 9.65529300  | 3.78719700 |
| I | 12.04235400 | 11.22799100 | 8.02346000 |

### 1-I-PPh<sub>3</sub>

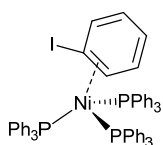

$$E = -3522.20848963$$

$$G_{\text{corr}} = 0.817953$$

|    |             |             |             |
|----|-------------|-------------|-------------|
| Ni | 9.88482800  | 11.29468700 | 3.81988700  |
| P  | 10.12839700 | 10.69239700 | 1.72997000  |
| C  | 9.02492700  | 9.39146600  | 1.01094400  |
| C  | 7.77605900  | 9.18483900  | 1.61472400  |
| H  | 7.52209600  | 9.73207800  | 2.51562300  |
| C  | 6.85875200  | 8.28726600  | 1.06263200  |
| H  | 5.88856100  | 8.15681900  | 1.53385600  |
| C  | 7.18920600  | 7.56393900  | -0.08561300 |
| H  | 6.47831500  | 6.86113900  | -0.51252600 |
| C  | 8.44097400  | 7.74512800  | -0.68201800 |
| H  | 8.70678000  | 7.18217500  | -1.57327100 |
| C  | 9.35083800  | 8.65634200  | -0.14164900 |
| H  | 10.31395100 | 8.79956100  | -0.62294000 |
| C  | 11.78077900 | 10.14800500 | 1.08533000  |
| C  | 12.34719700 | 8.99166700  | 1.64852400  |
| H  | 11.78720000 | 8.42350400  | 2.38385600  |
| C  | 13.63045400 | 8.57763100  | 1.29467100  |
| H  | 14.05265300 | 7.68704400  | 1.75247700  |
| C  | 14.37617600 | 9.31917400  | 0.37174900  |
| H  | 15.38198600 | 9.00627900  | 0.10363300  |
| C  | 13.82034500 | 10.46453100 | -0.20215000 |
| H  | 14.38963900 | 11.04330700 | -0.92549700 |
| C  | 12.52957900 | 10.87483700 | 0.14791500  |
| H  | 12.11437400 | 11.77022100 | -0.30390700 |

|   |             |             |             |
|---|-------------|-------------|-------------|
| P | 8.08400800  | 12.43759100 | 4.25442300  |
| C | 7.38743000  | 12.39178900 | 5.97250100  |
| C | 6.57900800  | 13.40649200 | 6.51036400  |
| H | 6.32535400  | 14.27660100 | 5.91178700  |
| C | 6.10507600  | 13.31369300 | 7.81987600  |
| H | 5.48673300  | 14.10947300 | 8.22801300  |
| C | 6.42576700  | 12.20105200 | 8.60529100  |
| H | 6.06142700  | 12.13212500 | 9.62721400  |
| C | 7.22367200  | 11.18554200 | 8.07569000  |
| H | 7.49369200  | 10.32690100 | 8.68229100  |
| C | 7.70474900  | 11.28323100 | 6.76796200  |
| H | 8.35228400  | 10.50947500 | 6.36440600  |
| C | 8.36729900  | 14.25016500 | 3.98895200  |
| C | 7.37441900  | 15.15901600 | 3.59041800  |
| H | 6.36101800  | 14.81361600 | 3.40974600  |
| C | 7.68075200  | 16.51030200 | 3.40756900  |
| H | 6.90135000  | 17.19953900 | 3.09244800  |
| C | 8.98039800  | 16.97557800 | 3.62684400  |
| H | 9.21583600  | 18.02653900 | 3.47991900  |
| C | 9.97550700  | 16.08083000 | 4.03049900  |
| H | 10.99356600 | 16.42473800 | 4.19531400  |
| C | 9.66919000  | 14.73094100 | 4.20505400  |
| H | 10.45178700 | 14.03438400 | 4.48645800  |
| P | 11.60352200 | 11.21891600 | 5.13972300  |
| C | 11.48232800 | 11.51471700 | 6.96856600  |
| C | 10.61033700 | 12.52396800 | 7.40744300  |
| H | 10.04901000 | 13.10032600 | 6.67920100  |
| C | 10.44282400 | 12.78664500 | 8.76774900  |
| H | 9.75784600  | 13.56926400 | 9.08306300  |
| C | 11.13165300 | 12.02643400 | 9.71657700  |
| H | 10.99205300 | 12.21818300 | 10.77737400 |
| C | 11.99904800 | 11.01565700 | 9.29314200  |
| H | 12.54147300 | 10.42098400 | 10.02427900 |
| C | 12.17850800 | 10.76511300 | 7.92996900  |
| H | 12.85790000 | 9.97714300  | 7.62106800  |
| C | 12.78906800 | 12.53442500 | 4.59222500  |
| C | 13.03329600 | 13.70822900 | 5.32144700  |
| H | 12.61040100 | 13.83524700 | 6.31288700  |
| C | 13.81755900 | 14.73219700 | 4.77946000  |
| H | 13.99285700 | 15.63521900 | 5.35910700  |
| C | 14.37745400 | 14.59607300 | 3.50741200  |
| H | 14.98535900 | 15.39357100 | 3.08819900  |
| C | 14.15429100 | 13.42233200 | 2.77985100  |
| H | 14.58864500 | 13.29692500 | 1.79117000  |
| C | 13.36425200 | 12.40554100 | 3.31438700  |
| H | 13.19621800 | 11.50395900 | 2.73695700  |
| C | 12.61030900 | 9.67218800  | 5.08226700  |
| C | 11.89329800 | 8.46902500  | 5.00284600  |
| C | 14.01129000 | 9.62707100  | 5.11580900  |
| C | 12.55634000 | 7.24205700  | 4.97081500  |
| H | 10.80938600 | 8.51046400  | 4.94754300  |
| C | 14.67889600 | 8.40021500  | 5.06364900  |
| H | 14.58414100 | 10.54769300 | 5.17794100  |
| C | 13.95455200 | 7.20633400  | 4.99561600  |
| H | 11.98625300 | 6.31835600  | 4.91163400  |

|   |             |             |             |
|---|-------------|-------------|-------------|
| H | 15.76567300 | 8.37734400  | 5.07954900  |
| H | 14.47657900 | 6.25371500  | 4.95767500  |
| C | 6.56710200  | 12.08443500 | 3.25162800  |
| C | 6.50102900  | 12.49821100 | 1.90874400  |
| C | 5.56317400  | 11.23359400 | 3.74250400  |
| C | 5.45852700  | 12.07637400 | 1.08395400  |
| H | 7.27065800  | 13.14609600 | 1.50228000  |
| C | 4.52333000  | 10.80609700 | 2.91195600  |
| H | 5.59801400  | 10.88766500 | 4.77132700  |
| C | 4.46661500  | 11.22458700 | 1.58035000  |
| H | 5.42896700  | 12.40662200 | 0.04868600  |
| H | 3.75729900  | 10.14495800 | 3.30984600  |
| H | 3.65922800  | 10.88936500 | 0.93451800  |
| C | 9.76264200  | 12.16537100 | 0.66706100  |
| C | 10.22113000 | 13.40974100 | 1.13234900  |
| C | 8.99627600  | 12.12414900 | -0.50640600 |
| C | 9.90899900  | 14.58678500 | 0.45299200  |
| H | 10.80291800 | 13.45202900 | 2.04785500  |
| C | 8.67977400  | 13.30403800 | -1.18665300 |
| H | 8.62514900  | 11.17648100 | -0.88337100 |
| C | 9.12914600  | 14.53723000 | -0.70720100 |
| H | 10.25512300 | 15.54008800 | 0.84320900  |
| H | 8.07413900  | 13.25772900 | -2.08843900 |
| H | 8.87145400  | 15.45382700 | -1.23160800 |
| C | 7.80575800  | 7.73887500  | 6.74728200  |
| C | 7.99227800  | 7.45094900  | 5.39253900  |
| C | 6.52564400  | 7.94048500  | 7.27119200  |
| C | 6.87693100  | 7.36890400  | 4.55481400  |
| H | 8.98485000  | 7.28841400  | 4.98818800  |
| C | 5.42067000  | 7.86371500  | 6.41805900  |
| H | 6.38643100  | 8.16415900  | 8.32294900  |
| C | 5.59266000  | 7.58129400  | 5.06088200  |
| H | 7.02266300  | 7.14542200  | 3.50342300  |
| H | 4.42543700  | 8.02702700  | 6.82273500  |
| H | 4.73114000  | 7.52333900  | 4.40165800  |
| I | 9.50022600  | 7.93387800  | 8.01184700  |

### 1-Br-PMe<sub>3</sub>

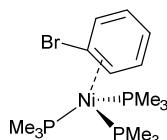

|                   |   |                                     |
|-------------------|---|-------------------------------------|
| E                 | = | -1797.8383525                       |
| G <sub>corr</sub> | = | 0.37561                             |
| Ni                |   | -1.26659300 -0.71246100 0.36778700  |
| P                 |   | -0.53301100 0.31658100 -1.46597500  |
| P                 |   | -0.52487800 -2.85111600 0.14705800  |
| P                 |   | -3.52146500 -0.88934500 -0.01169600 |
| C                 |   | -0.64872900 0.56034500 1.72586800   |
| C                 |   | -1.45073200 -0.38760800 2.45563300  |
| C                 |   | 0.77447500 0.55081700 1.92940800    |
| Br                |   | -1.40745300 2.49600600 1.60739600   |
| C                 |   | -0.80277500 -1.27845400 3.37164100  |

|   |             |             |             |
|---|-------------|-------------|-------------|
| H | -2.50049100 | -0.17436200 | 2.62947500  |
| C | 1.35950800  | -0.37191600 | 2.76818400  |
| H | 1.38470700  | 1.28553200  | 1.41595500  |
| C | 0.56608200  | -1.29132600 | 3.51144100  |
| H | -1.42387900 | -1.93454400 | 3.97825500  |
| H | 2.44208600  | -0.38455900 | 2.87465800  |
| H | 1.04429600  | -1.98115300 | 4.20243200  |
| C | -4.42301500 | -2.15916500 | 0.99657000  |
| H | -4.22663700 | -1.99063900 | 2.06118700  |
| H | -5.50679500 | -2.13368300 | 0.82561200  |
| H | -4.05095100 | -3.15679900 | 0.73842300  |
| C | -4.56169000 | 0.60556300  | 0.32601400  |
| H | -5.62913900 | 0.41252000  | 0.15888000  |
| H | -4.41334900 | 0.92574100  | 1.36247900  |
| H | -4.23859400 | 1.42587100  | -0.32261800 |
| C | -4.12455200 | -1.35059700 | -1.70441200 |
| H | -3.79452800 | -0.60541700 | -2.43524400 |
| H | -3.69795200 | -2.31750800 | -1.99240800 |
| H | -5.21898100 | -1.42060100 | -1.74416300 |
| C | -0.32714800 | -0.70421900 | -2.99747600 |
| H | -0.04585900 | -0.08420900 | -3.85743900 |
| H | 0.45190100  | -1.45732600 | -2.83921600 |
| H | -1.26579900 | -1.21953700 | -3.22528000 |
| C | -1.60700800 | 1.67669400  | -2.12107700 |
| H | -2.60197300 | 1.28621400  | -2.35604900 |
| H | -1.71422100 | 2.44992800  | -1.35524400 |
| H | -1.18090100 | 2.12403000  | -3.02786000 |
| C | 1.09928200  | 1.18794600  | -1.42543600 |
| H | 1.88263300  | 0.49517900  | -1.10080700 |
| H | 1.36186700  | 1.59213300  | -2.41065500 |
| H | 1.04995100  | 2.01361500  | -0.70907800 |
| C | 1.30806900  | -3.08399000 | -0.00967000 |
| H | 1.79864500  | -2.64777800 | 0.86735200  |
| H | 1.58866400  | -4.14187900 | -0.09145900 |
| H | 1.66677800  | -2.55078200 | -0.89752400 |
| C | -1.11515300 | -3.85082500 | -1.30098900 |
| H | -0.87693900 | -3.34735100 | -2.24149000 |
| H | -0.65877400 | -4.84867900 | -1.31055800 |
| H | -2.20277800 | -3.96775100 | -1.24139900 |
| C | -0.89750200 | -4.06455000 | 1.49874600  |
| H | -0.39704300 | -3.75492500 | 2.41933300  |
| H | -1.97662700 | -4.08094400 | 1.68690200  |
| H | -0.56490000 | -5.07514300 | 1.23076300  |

### 1-Cl-PMe<sub>3</sub>

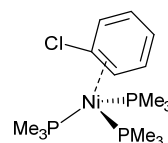

|                   |   |                                    |
|-------------------|---|------------------------------------|
| E                 | = | -2244.89074075                     |
| G <sub>corr</sub> | = | 0.378569                           |
| Ni                |   | -1.28640400 -0.69503500 0.35771500 |
| P                 |   | -0.55764000 0.32899600 -1.47456200 |

|    |             |             |             |
|----|-------------|-------------|-------------|
| P  | -0.50777400 | -2.82674800 | 0.17771900  |
| P  | -3.51805700 | -0.89376200 | -0.00703100 |
| C  | -0.59406700 | 0.59627900  | 1.71104100  |
| C  | -1.46808300 | -0.29594400 | 2.42879500  |
| C  | 0.82382600  | 0.49428600  | 1.92764600  |
| C  | -0.88558700 | -1.22766600 | 3.34910700  |
| H  | -2.50052900 | -0.00528300 | 2.59762200  |
| C  | 1.33934600  | -0.46079600 | 2.77370600  |
| H  | 1.48020600  | 1.19298300  | 1.41974500  |
| C  | 0.47753300  | -1.32584600 | 3.50738700  |
| H  | -1.55329400 | -1.84916800 | 3.94226400  |
| H  | 2.41711000  | -0.54250900 | 2.89470400  |
| H  | 0.90129100  | -2.04571900 | 4.20318100  |
| C  | -4.39426100 | -2.18248400 | 0.99880900  |
| H  | -4.19054800 | -2.01476600 | 2.06215300  |
| H  | -5.47960400 | -2.17420700 | 0.83612900  |
| H  | -4.00689900 | -3.17230900 | 0.73347900  |
| C  | -4.58973400 | 0.57941500  | 0.33857500  |
| H  | -5.65117600 | 0.37241700  | 0.15119700  |
| H  | -4.46855900 | 0.88300100  | 1.38431300  |
| H  | -4.27264400 | 1.41668200  | -0.29216300 |
| C  | -4.11504300 | -1.35409600 | -1.70184300 |
| H  | -3.80613000 | -0.59276300 | -2.42532900 |
| H  | -3.66347600 | -2.30625500 | -2.00062900 |
| H  | -5.20730700 | -1.45302000 | -1.73958200 |
| C  | -0.38227600 | -0.68312600 | -3.01665300 |
| H  | -0.11037900 | -0.05955400 | -3.87717700 |
| H  | 0.39509300  | -1.44142500 | -2.87567300 |
| H  | -1.32670100 | -1.19230800 | -3.23415900 |
| C  | -1.61742900 | 1.71007600  | -2.11218400 |
| H  | -2.62273900 | 1.33498700  | -2.32888800 |
| H  | -1.69838200 | 2.48422700  | -1.34377700 |
| H  | -1.20137300 | 2.15318800  | -3.02585200 |
| C  | 1.09127700  | 1.17148800  | -1.44863400 |
| H  | 1.86611300  | 0.45870500  | -1.14705700 |
| H  | 1.34733300  | 1.58498900  | -2.43186900 |
| H  | 1.06908700  | 1.98630300  | -0.71878000 |
| C  | 1.32816300  | -3.04576800 | 0.01607000  |
| H  | 1.81876000  | -2.61397800 | 0.89500400  |
| H  | 1.61836300  | -4.10030900 | -0.07723300 |
| H  | 1.67976500  | -2.50045700 | -0.86744700 |
| C  | -1.08328200 | -3.83137500 | -1.27504100 |
| H  | -0.84809400 | -3.32278300 | -2.21350800 |
| H  | -0.61695100 | -4.82479800 | -1.28730600 |
| H  | -2.16998900 | -3.95903800 | -1.21972400 |
| C  | -0.86466500 | -4.06014700 | 1.51877600  |
| H  | -0.37954400 | -3.74882800 | 2.44675600  |
| H  | -1.94477700 | -4.10023600 | 1.69824500  |
| H  | -0.50969300 | -5.06201500 | 1.24598100  |
| Cl | -1.18004200 | 2.35007400  | 1.48821100  |

**TS-1-2-I-PMe<sub>3</sub>**

|                   |   |                                     |
|-------------------|---|-------------------------------------|
| E                 | = | -1796.04680227                      |
| G <sub>corr</sub> | = | 0.377806                            |
| Ni                |   | -1.26352300 -0.67705500 0.33125100  |
| P                 |   | -0.49319800 0.41808800 -1.42936700  |
| P                 |   | -0.41738100 -2.74270800 0.27411300  |
| P                 |   | -3.49025200 -0.79489900 0.14889000  |
| C                 |   | -0.65193400 0.70142700 1.96673200   |
| C                 |   | -1.44280400 -0.15226100 2.78351300  |
| C                 |   | 0.76455700 0.57089800 2.01407500    |
| C                 |   | -0.81404600 -1.07608100 3.64661800  |
| H                 |   | -2.50809500 0.02041900 2.87226800   |
| C                 |   | 1.35688900 -0.36446700 2.85298600   |
| H                 |   | 1.38125500 1.22873700 1.41348500    |
| C                 |   | 0.56977200 -1.17748700 3.69272200   |
| H                 |   | -1.43435600 -1.69412000 4.29126800  |
| H                 |   | 2.44054500 -0.45291000 2.86681500   |
| H                 |   | 1.04588300 -1.88149200 4.37002200   |
| C                 |   | -4.43865900 -1.96586900 1.23595600  |
| H                 |   | -4.31304200 -1.67468600 2.28504300  |
| H                 |   | -5.51070500 -1.97991700 0.99986300  |
| H                 |   | -4.03589600 -2.97832000 1.11966400  |
| C                 |   | -4.54746000 0.71984700 0.33490200   |
| H                 |   | -5.60646200 0.50636100 0.13942400   |
| H                 |   | -4.44758600 1.11844200 1.35027900   |
| H                 |   | -4.20313300 1.49133800 -0.36135800  |
| C                 |   | -4.06207600 -1.38003700 -1.51751400 |
| H                 |   | -3.70690700 -0.68802900 -2.28820500 |
| H                 |   | -3.63435300 -2.36624300 -1.72690300 |
| H                 |   | -5.15599500 -1.44553600 -1.57852200 |
| C                 |   | -0.18287300 -0.62635100 -2.93197200 |
| H                 |   | 0.13413800 -0.01920600 -3.78923600  |
| H                 |   | 0.59726400 -1.36402300 -2.71690300  |
| H                 |   | -1.10040600 -1.16182500 -3.19925200 |
| C                 |   | -1.58838100 1.71337300 -2.18706200  |
| H                 |   | -2.55781100 1.27341800 -2.44323800  |
| H                 |   | -1.75879000 2.51696500 -1.46436800  |
| H                 |   | -1.14356200 2.13929900 -3.09562600  |
| C                 |   | 1.09624500 1.37259300 -1.36594500   |
| H                 |   | 1.90829200 0.72148800 -1.02563200   |
| H                 |   | 1.35648000 1.78629800 -2.34827400   |
| H                 |   | 0.99469600 2.19959900 -0.65545400   |
| C                 |   | 1.42129200 -2.93150200 0.09305000   |
| H                 |   | 1.91791200 -2.44999900 0.94211600   |
| H                 |   | 1.73015900 -3.98388700 0.04594600   |
| H                 |   | 1.74838300 -2.42319200 -0.82104000  |
| C                 |   | -0.99030400 -3.81227700 -1.13325200 |
| H                 |   | -0.83202400 -3.30318100 -2.08842200 |
| H                 |   | -0.45848700 -4.77210500 -1.15143100 |
| H                 |   | -2.06261600 -4.00945300 -1.02725500 |
| C                 |   | -0.71949500 -3.92544100 1.67324900  |
| H                 |   | -0.23214600 -3.55839400 2.58014700  |
| H                 |   | -1.79584300 -3.98654700 1.86866400  |

|   |             |             |            |
|---|-------------|-------------|------------|
| H | -0.33746200 | -4.92819900 | 1.44302300 |
| I | -1.40252700 | 2.78389900  | 1.68028700 |

### TS-1-2-I-PMe<sub>2</sub>Ph

E = -2371.42764175

G<sub>corr</sub> = 0.528074

|    |             |            |             |
|----|-------------|------------|-------------|
| Ni | -1.74979600 | 3.37904100 | 0.08652900  |
| P  | -1.25700300 | 3.37594500 | -2.08759300 |
| P  | 0.19711900  | 3.46751600 | 1.17526800  |
| P  | -3.18227900 | 5.04013700 | 0.40522900  |
| C  | 0.22338400  | 4.42093300 | -2.47338700 |
| C  | 0.12527000  | 5.82191800 | -2.40823400 |
| H  | -0.82953400 | 6.29058400 | -2.20004500 |
| C  | 1.24784300  | 6.63044500 | -2.58942200 |
| H  | 1.14155100  | 7.71072300 | -2.53162200 |
| C  | 2.49978000  | 6.05661500 | -2.83037300 |
| H  | 3.37608500  | 6.68546600 | -2.96456000 |
| C  | 2.61346800  | 4.66594500 | -2.89686100 |
| H  | 3.58044300  | 4.20562000 | -3.08533700 |
| C  | 1.48655800  | 3.85685500 | -2.72331500 |
| H  | 1.60475900  | 2.77882900 | -2.77767200 |
| C  | -2.50073400 | 4.10732400 | -3.26200000 |
| H  | -3.41017400 | 3.49793500 | -3.21666000 |
| H  | -2.13243100 | 4.12789600 | -4.29483200 |
| H  | -2.75563800 | 5.12511400 | -2.95682300 |
| C  | -0.85705500 | 1.84842200 | -3.07423800 |
| H  | -1.77636400 | 1.27079000 | -3.19962100 |
| H  | -0.13015900 | 1.22072200 | -2.55110100 |
| H  | -0.46549500 | 2.10619300 | -4.06485600 |
| C  | 0.24234300  | 3.44704000 | 3.02459400  |
| C  | -0.25474700 | 4.56762800 | 3.71409200  |
| H  | -0.58457500 | 5.43953200 | 3.15489500  |
| C  | -0.35315500 | 4.57278000 | 5.10413200  |
| H  | -0.73991700 | 5.45112500 | 5.61537700  |
| C  | 0.03834500  | 3.44773700 | 5.83971900  |
| H  | -0.04235400 | 3.44663000 | 6.92364800  |
| C  | 0.54217000  | 2.33120900 | 5.16939600  |
| H  | 0.85635400  | 1.45479100 | 5.73133800  |
| C  | 0.64694100  | 2.33235800 | 3.77487500  |
| H  | 1.03395000  | 1.44757700 | 3.27831600  |
| C  | 1.40661600  | 2.12423200 | 0.74234000  |
| H  | 0.97113900  | 1.13194300 | 0.89424700  |
| H  | 2.34332000  | 2.19499100 | 1.30800400  |
| H  | 1.63028600  | 2.23060700 | -0.32445000 |
| C  | 1.31282600  | 4.92262400 | 0.86607800  |
| H  | 0.80123700  | 5.85834500 | 1.09729000  |
| H  | 1.58856400  | 4.94103400 | -0.19000300 |
| H  | 2.22334900  | 4.85146400 | 1.47217100  |
| C  | -2.56082600 | 6.69432400 | -0.15126100 |
| C  | -3.03570300 | 7.34926300 | -1.29970700 |
| H  | -3.84846000 | 6.92494800 | -1.87980500 |
| C  | -2.46872700 | 8.55522400 | -1.72606700 |
| H  | -2.84810000 | 9.03793300 | -2.62337800 |

|   |             |             |             |
|---|-------------|-------------|-------------|
| C | -1.42442100 | 9.13709100  | -1.00537300 |
| H | -0.98241500 | 10.07254500 | -1.33809000 |
| C | -0.95784600 | 8.50839300  | 0.15409900  |
| H | -0.15194300 | 8.95575500  | 0.73055300  |
| C | -1.52017900 | 7.30274600  | 0.57214200  |
| H | -1.14300400 | 6.82738600  | 1.47262900  |
| C | -3.79051200 | 5.50597200  | 2.10333900  |
| H | -4.43818500 | 4.70724900  | 2.47627800  |
| H | -4.35562600 | 6.44505800  | 2.08417500  |
| H | -2.94894400 | 5.60133400  | 2.79471200  |
| C | -4.83229400 | 4.97139400  | -0.44672900 |
| H | -5.40135700 | 4.14467800  | -0.01413500 |
| H | -4.71330800 | 4.76566300  | -1.51383800 |
| H | -5.40447300 | 5.89713800  | -0.31434800 |
| C | -3.21971500 | 1.72218200  | 1.21338600  |
| C | -2.14833900 | 1.07133600  | 0.55982800  |
| H | -1.22477100 | 0.87105200  | 1.08685500  |
| C | -2.40958100 | 0.39599000  | -0.65537000 |
| H | -1.59866600 | -0.15288700 | -1.12404000 |
| C | -4.51196600 | 1.71698500  | 0.63370700  |
| H | -5.33892600 | 2.18327600  | 1.15866500  |
| C | -3.67143900 | 0.41121200  | -1.22996700 |
| H | -3.85287700 | -0.11360100 | -2.16409100 |
| C | -4.72380900 | 1.09001600  | -0.58596400 |
| H | -5.71782600 | 1.10152200  | -1.02581500 |
| I | -3.12594700 | 2.00355000  | 3.34339400  |

### TS-1-2-I-PMePh<sub>2</sub>

E = -2946.81030933

G<sub>corr</sub> = 0.678608

|    |             |             |             |
|----|-------------|-------------|-------------|
| Ni | -2.39362100 | 0.71517600  | -0.00066400 |
| P  | -1.97553200 | -1.34589900 | -0.75826200 |
| C  | -3.46716100 | -2.39100200 | -1.13934200 |
| C  | -4.19916500 | -2.13501700 | -2.31230600 |
| H  | -3.84503600 | -1.39603300 | -3.02235300 |
| C  | -5.39338900 | -2.80742800 | -2.57788300 |
| H  | -5.94095600 | -2.58930000 | -3.49155000 |
| C  | -5.88432000 | -3.75371700 | -1.67353500 |
| H  | -6.81693100 | -4.27385500 | -1.87550400 |
| C  | -5.16004400 | -4.02879000 | -0.51138400 |
| H  | -5.52448300 | -4.76930200 | 0.19637300  |
| C  | -3.96231900 | -3.35842100 | -0.24950500 |
| H  | -3.41730600 | -3.59028800 | 0.65937100  |
| C  | -1.01087200 | -2.48029200 | 0.34458700  |
| C  | -1.30303000 | -2.44361900 | 1.71661400  |
| H  | -2.05411100 | -1.75321800 | 2.07901600  |
| C  | -0.63199200 | -3.26890800 | 2.61987900  |
| H  | -0.88676900 | -3.22520400 | 3.67557900  |
| C  | 0.37083600  | -4.12941500 | 2.16666000  |
| H  | 0.90613800  | -4.76518000 | 2.86725400  |
| C  | 0.68640600  | -4.16278300 | 0.80512500  |
| H  | 1.46993700  | -4.82456000 | 0.44414500  |
| C  | -0.00365800 | -3.35224300 | -0.10054800 |

|   |             |             |             |
|---|-------------|-------------|-------------|
| H | 0.25729600  | -3.40661400 | -1.15208900 |
| C | -1.06777900 | -1.52894500 | -2.36988200 |
| H | -0.99566900 | -2.56911400 | -2.70341200 |
| H | -0.06344800 | -1.10781500 | -2.26212400 |
| H | -1.59578300 | -0.95879300 | -3.13773700 |
| P | -3.25839000 | 2.05537400  | -1.59018800 |
| C | -4.07333600 | 3.56101100  | -0.88658100 |
| C | -3.28606600 | 4.60666800  | -0.36820900 |
| H | -2.20677400 | 4.57303900  | -0.47262100 |
| C | -3.87175000 | 5.69803100  | 0.27183700  |
| H | -3.24296200 | 6.49645200  | 0.65807800  |
| C | -5.26185400 | 5.76331400  | 0.42031300  |
| H | -5.71955400 | 6.60920900  | 0.92644800  |
| C | -6.05421600 | 4.73424500  | -0.08969500 |
| H | -7.13495100 | 4.76933800  | 0.02124400  |
| C | -5.46665700 | 3.64548700  | -0.74168100 |
| H | -6.10799400 | 2.85529600  | -1.11677400 |
| C | -2.22450500 | 2.78935000  | -2.95081300 |
| C | -2.50595200 | 4.02674200  | -3.55252600 |
| H | -3.32329300 | 4.63919100  | -3.18338400 |
| C | -1.74299900 | 4.48489100  | -4.62971400 |
| H | -1.97263200 | 5.44717800  | -5.08075700 |
| C | -0.69488100 | 3.70813100  | -5.13187200 |
| H | -0.10292400 | 4.06545600  | -5.97057400 |
| C | -0.41192900 | 2.47167500  | -4.54664400 |
| H | 0.40574800  | 1.86188300  | -4.92312900 |
| C | -1.16693000 | 2.02296100  | -3.46076100 |
| H | -0.91751800 | 1.08307000  | -2.98402500 |
| C | -4.59287400 | 1.39595700  | -2.70795000 |
| H | -5.06532100 | 2.20613000  | -3.27369800 |
| H | -5.35181500 | 0.84512600  | -2.15150300 |
| H | -4.11717400 | 0.71386800  | -3.41761200 |
| P | -3.91743700 | 0.90510500  | 1.67732800  |
| C | -4.07925000 | -0.32754700 | 3.06774200  |
| C | -3.71234300 | -0.04448600 | 4.39281300  |
| H | -3.35767400 | 0.94346900  | 4.66626000  |
| C | -3.78440000 | -1.02906000 | 5.38327000  |
| H | -3.49275800 | -0.78508500 | 6.40207800  |
| C | -4.22735300 | -2.31578600 | 5.07032100  |
| H | -4.27898500 | -3.08104700 | 5.84046500  |
| C | -4.61005300 | -2.60718300 | 3.75735300  |
| H | -4.96283900 | -3.60217500 | 3.49679100  |
| C | -4.53696700 | -1.62344900 | 2.77147700  |
| H | -4.83438700 | -1.87259800 | 1.75843700  |
| C | -5.68271400 | 0.85021300  | 1.10247000  |
| C | -6.02087000 | -0.07802200 | 0.10667100  |
| H | -5.24592300 | -0.70235700 | -0.32210300 |
| C | -7.33499600 | -0.19830100 | -0.35132000 |
| H | -7.56760000 | -0.92885300 | -1.12174900 |
| C | -8.33483700 | 0.62584400  | 0.17098200  |
| H | -9.35699900 | 0.54460200  | -0.18974700 |
| C | -8.01101000 | 1.55575000  | 1.16333800  |
| H | -8.78163200 | 2.20192200  | 1.57661300  |
| C | -6.69890600 | 1.66212400  | 1.63079700  |
| H | -6.47812000 | 2.39393800  | 2.40030200  |

|   |             |             |             |
|---|-------------|-------------|-------------|
| C | -3.86736800 | 2.50621200  | 2.60884900  |
| H | -4.57230400 | 2.54959900  | 3.44471900  |
| H | -4.08538800 | 3.31658000  | 1.90957800  |
| H | -2.85705100 | 2.65540600  | 2.99801300  |
| C | -0.69183200 | 2.27190600  | 0.58059200  |
| H | -1.33550500 | 2.92606400  | 1.15707600  |
| C | -0.27938700 | 1.01983400  | 1.10003400  |
| C | 0.75866100  | 0.29311100  | 0.45467200  |
| H | 1.07724000  | -0.65953100 | 0.86219600  |
| C | -0.00205700 | 2.79576800  | -0.54047000 |
| H | -0.27624500 | 3.77806400  | -0.91214900 |
| C | 1.01689300  | 2.08860400  | -1.15405900 |
| H | 1.53187500  | 2.51159800  | -2.01121700 |
| C | 1.37587700  | 0.81386700  | -0.66962100 |
| H | 2.16482100  | 0.24586200  | -1.15657500 |
| I | -0.35864800 | 0.72468200  | 3.24761900  |

### TS-1-2-I-PPh<sub>3</sub>

E = -3522.177200

G<sub>corr</sub> = 0.828053

|    |             |             |             |
|----|-------------|-------------|-------------|
| Ni | -0.14490500 | 0.11140500  | 0.08611000  |
| P  | 0.02944800  | -0.36614700 | -2.17758100 |
| C  | -1.39465200 | -1.03523500 | -3.17176500 |
| C  | -2.52690600 | -0.22688700 | -3.35940400 |
| H  | -2.53202200 | 0.78160300  | -2.97240800 |
| C  | -3.64607700 | -0.70173700 | -4.04205400 |
| H  | -4.50529100 | -0.04966200 | -4.17537000 |
| C  | -3.66086300 | -2.00620400 | -4.54578800 |
| H  | -4.53455200 | -2.38221400 | -5.07192600 |
| C  | -2.53951100 | -2.81899100 | -4.37062000 |
| H  | -2.53469900 | -3.83403500 | -4.76021900 |
| C  | -1.41447900 | -2.33723600 | -3.69434400 |
| H  | -0.55931600 | -2.99169000 | -3.56869200 |
| C  | 1.31662500  | -1.61430600 | -2.66574200 |
| C  | 1.56642600  | -2.67107400 | -1.78039100 |
| H  | 1.05511200  | -2.68966800 | -0.82479200 |
| C  | 2.48072100  | -3.67576700 | -2.10772900 |
| H  | 2.66322900  | -4.48401600 | -1.40516300 |
| C  | 3.17699700  | -3.62064900 | -3.31647100 |
| H  | 3.89981300  | -4.39273600 | -3.56721400 |
| C  | 2.94502000  | -2.56219700 | -4.20148600 |
| H  | 3.48670300  | -2.51027400 | -5.14265900 |
| C  | 2.01367400  | -1.57177400 | -3.88465500 |
| H  | 1.83730900  | -0.76171400 | -4.58530300 |
| P  | -1.20480000 | 2.22888300  | 0.23277800  |
| C  | -2.16678800 | 2.71576200  | 1.77750900  |
| C  | -1.68233500 | 3.72247700  | 2.63591400  |
| H  | -0.78013900 | 4.26687800  | 2.38532900  |
| C  | -2.33533200 | 4.04202000  | 3.82840000  |
| H  | -1.92912400 | 4.82558000  | 4.46317300  |
| C  | -3.50229500 | 3.37129200  | 4.19879400  |
| H  | -4.01687100 | 3.62539200  | 5.12161600  |
| C  | -3.99480700 | 2.36525400  | 3.36737900  |



|   |             |             |             |   |             |             |             |
|---|-------------|-------------|-------------|---|-------------|-------------|-------------|
| H | -4.89409300 | 1.81887100  | 3.63959100  | C | -4.18714600 | 3.02279200  | -3.31397200 |
| C | -3.32743100 | 2.03418400  | 2.18696600  | H | -2.46351000 | 3.87146900  | -4.30209700 |
| H | -3.72657300 | 1.21328400  | 1.60786600  | H | -5.68318300 | 2.09622400  | -2.06431800 |
| C | -0.14550600 | 3.75277600  | 0.08685700  | H | -4.86262700 | 3.19338700  | -4.14789900 |
| C | -0.68894600 | 5.02422800  | -0.17521800 | C | 0.51711600  | 1.09461300  | -3.21514500 |
| H | -1.75778000 | 5.13611900  | -0.32850000 | C | 1.32662600  | 2.06259500  | -2.60656000 |
| C | 0.13159800  | 6.14958400  | -0.24035100 | C | 0.12335700  | 1.29298700  | -4.54863500 |
| H | -0.30591900 | 7.12229900  | -0.45003100 | C | 1.73281000  | 3.20460900  | -3.29756300 |
| C | 1.51077800  | 6.02973500  | -0.03336300 | H | 1.61601400  | 1.92625200  | -1.57483100 |
| H | 2.14898400  | 6.90788700  | -0.08764700 | C | 0.51923300  | 2.43980200  | -5.24162800 |
| C | 2.05849900  | 4.77755500  | 0.24592100  | H | -0.50346300 | 0.56139200  | -5.04780000 |
| H | 3.12668500  | 4.66324600  | 0.40810300  | C | 1.32292300  | 3.39993900  | -4.61885600 |
| C | 1.22987100  | 3.65408600  | 0.30690100  | H | 2.34881000  | 3.94403300  | -2.79313300 |
| H | 1.66152800  | 2.68773600  | 0.51770500  | H | 0.19710700  | 2.58314000  | -6.27004400 |
| P | 1.91455700  | 0.00775700  | 1.11200600  | H | 1.62296100  | 4.29394800  | -5.15947600 |
| C | 2.10253300  | 0.87485000  | 2.74900100  | I | -1.39476300 | -0.76157800 | 3.45212600  |
| C | 1.11595200  | 1.77135200  | 3.16628100  | C | -1.23931100 | -1.42545300 | 1.36322200  |
| H | 0.23684700  | 1.90409400  | 2.55245900  | C | -2.26925500 | -1.02580000 | 0.47308600  |
| C | 1.23361000  | 2.46765000  | 4.37178900  | C | -0.68116500 | -2.72605600 | 1.21632900  |
| H | 0.44377500  | 3.15028200  | 4.67307700  | C | -2.74949000 | -1.93421300 | -0.49622800 |
| C | 2.35069500  | 2.26852100  | 5.18361500  | H | -2.84801600 | -0.13755200 | 0.66863300  |
| H | 2.44666700  | 2.80393000  | 6.12478600  | C | -1.13780900 | -3.57989000 | 0.22529200  |
| C | 3.34775400  | 1.37177800  | 4.78144400  | H | 0.08294100  | -3.06357400 | 1.90395000  |
| H | 4.22171100  | 1.21020600  | 5.40738900  | C | -2.19751900 | -3.19742700 | -0.62064800 |
| C | 3.22503200  | 0.68165800  | 3.57566000  | H | -3.57157900 | -1.62848800 | -1.13512800 |
| H | 4.00886200  | -0.00722800 | 3.27524200  | H | -0.68692500 | -4.56416500 | 0.12519200  |
| C | 3.35559100  | 0.75866200  | 0.18155900  | H | -2.58038600 | -3.88931600 | -1.36414900 |
| C | 4.11824100  | 1.83226000  | 0.67477900  |   |             |             |             |
| H | 3.91588800  | 2.24632600  | 1.65545200  |   |             |             |             |
| C | 5.13803800  | 2.40250100  | -0.09252200 |   |             |             |             |
| H | 5.70580300  | 3.23620300  | 0.31306100  |   |             |             |             |
| C | 5.42938100  | 1.90852200  | -1.36563100 |   |             |             |             |
| H | 6.22306900  | 2.35386600  | -1.95958300 |   |             |             |             |
| C | 4.68368600  | 0.84044300  | -1.86771000 |   |             |             |             |
| H | 4.88362800  | 0.44448500  | -2.85995800 |   |             |             |             |
| C | 3.65563000  | 0.28430800  | -1.10630000 |   |             |             |             |
| H | 3.07145100  | -0.51784000 | -1.53307600 |   |             |             |             |
| C | 2.62631600  | -1.64948900 | 1.60742700  |   |             |             |             |
| C | 2.18822600  | -2.23311400 | 2.81107900  |   |             |             |             |
| C | 3.54570100  | -2.36561600 | 0.82772100  |   |             |             |             |
| C | 2.64057900  | -3.49037100 | 3.21157500  |   |             |             |             |
| H | 1.48853100  | -1.70078900 | 3.44622900  |   |             |             |             |
| C | 3.99934300  | -3.62675800 | 1.22717000  |   |             |             |             |
| H | 3.92810900  | -1.95029300 | -0.09570000 |   |             |             |             |
| C | 3.54712000  | -4.19804200 | 2.41705400  |   |             |             |             |
| H | 2.28403800  | -3.91369100 | 4.14735000  |   |             |             |             |
| H | 4.71432700  | -4.15656500 | 0.60271100  |   |             |             |             |
| H | 3.90200800  | -5.17742600 | 2.72713000  |   |             |             |             |
| C | -2.43095300 | 2.58603300  | -1.13411400 |   |             |             |             |
| C | -1.98067600 | 3.18800800  | -2.32545400 |   |             |             |             |
| C | -3.77716800 | 2.18803700  | -1.07432900 |   |             |             |             |
| C | -2.84684000 | 3.40652800  | -3.39781600 |   |             |             |             |
| H | -0.94582900 | 3.49002200  | -2.42692100 |   |             |             |             |
| C | -4.64549300 | 2.40936600  | -2.14656200 |   |             |             |             |
| H | -4.17342400 | 1.70313200  | -0.19336700 |   |             |             |             |

  

|                                  |   |             |             |                |  |  |  |
|----------------------------------|---|-------------|-------------|----------------|--|--|--|
| <b>TS-1-2-Br-PMe<sub>3</sub></b> |   |             |             |                |  |  |  |
| E                                | = |             |             | -1797.83515434 |  |  |  |
| G <sub>corr</sub>                | = |             |             | 0.376299       |  |  |  |
| Ni                               |   | -1.23515300 | -0.74540800 | 0.35925700     |  |  |  |
| P                                |   | -0.41258600 | 0.27447900  | -1.44617500    |  |  |  |
| P                                |   | -0.56820900 | -2.88579000 | 0.02357100     |  |  |  |
| P                                |   | -3.53500700 | -0.92565200 | -0.03821600    |  |  |  |
| C                                |   | -0.78466100 | 0.45242300  | 1.72307400     |  |  |  |
| C                                |   | -1.47471000 | -0.46800500 | 2.56445000     |  |  |  |
| C                                |   | 0.60166700  | 0.68369200  | 1.94410100     |  |  |  |
| Br                               |   | -1.85127300 | 2.67100200  | 1.70112100     |  |  |  |
| C                                |   | -0.75085500 | -1.17774000 | 3.56317300     |  |  |  |
| H                                |   | -2.55637000 | -0.45026800 | 2.63177100     |  |  |  |
| C                                |   | 1.28503400  | -0.04644900 | 2.90206600     |  |  |  |
| H                                |   | 1.12104700  | 1.42405300  | 1.34748300     |  |  |  |
| C                                |   | 0.61016100  | -0.98718800 | 3.71782800     |  |  |  |
| H                                |   | -1.29288100 | -1.84363300 | 4.23182700     |  |  |  |
| H                                |   | 2.35556300  | 0.10513900  | 3.02465900     |  |  |  |
| H                                |   | 1.15922000  | -1.53250900 | 4.48142200     |  |  |  |
| C                                |   | -4.39638400 | -2.31153100 | 0.83984600     |  |  |  |
| H                                |   | -4.23455900 | -2.21499800 | 1.91913400     |  |  |  |
| H                                |   | -5.47566900 | -2.31718200 | 0.64251800     |  |  |  |
| H                                |   | -3.97408500 | -3.26971700 | 0.51817800     |  |  |  |
| C                                |   | -4.60876700 | 0.50338300  | 0.42556400     |  |  |  |
| H                                |   | -5.66899500 | 0.29325700  | 0.23581700     |  |  |  |

|   |             |             |             |    |             |             |             |
|---|-------------|-------------|-------------|----|-------------|-------------|-------------|
| H | -4.46708700 | 0.73853400  | 1.48450400  | C  | -4.60245000 | 0.50020800  | 0.41607500  |
| H | -4.30153500 | 1.38579700  | -0.14299600 | H  | -5.66013600 | 0.30174700  | 0.20174900  |
| C | -4.08395800 | -1.23399800 | -1.78089400 | H  | -4.48170900 | 0.71859000  | 1.48094100  |
| H | -3.81880200 | -0.37676400 | -2.40858900 | H  | -4.27450400 | 1.38717300  | -0.13347500 |
| H | -3.57368000 | -2.11892700 | -2.17546500 | C  | -4.07187900 | -1.23082000 | -1.79378000 |
| H | -5.16776000 | -1.39176900 | -1.84440100 | H  | -3.79102500 | -0.37525400 | -2.41735300 |
| C | -0.42072400 | -0.73219000 | -2.99808900 | H  | -3.57117000 | -2.12176200 | -2.18684400 |
| H | -0.13842600 | -0.12391200 | -3.86578700 | H  | -5.15711700 | -1.37395200 | -1.86547700 |
| H | 0.28324600  | -1.56581700 | -2.91077000 | C  | -0.45636600 | -0.72279600 | -3.00113400 |
| H | -1.42325600 | -1.14036500 | -3.16057000 | H  | -0.18172500 | -0.10704200 | -3.86594400 |
| C | -1.37056400 | 1.75597500  | -1.98073000 | H  | 0.23681900  | -1.56759000 | -2.93824900 |
| H | -2.37675900 | 1.44853000  | -2.28417200 | H  | -1.46779600 | -1.11339400 | -3.14716700 |
| H | -1.46190000 | 2.44249600  | -1.13415900 | C  | -1.32384400 | 1.77771300  | -1.89879200 |
| H | -0.88621900 | 2.26352600  | -2.82404700 | H  | -2.35560200 | 1.50771900  | -2.14761000 |
| C | 1.31388500  | 0.93451400  | -1.45576800 | H  | -1.35048500 | 2.44937300  | -1.03562800 |
| H | 2.00849700  | 0.17445700  | -1.08407200 | H  | -0.87026200 | 2.28512000  | -2.75914900 |
| H | 1.61313000  | 1.23419700  | -2.46726800 | C  | 1.35451100  | 0.86194300  | -1.46994700 |
| H | 1.37736800  | 1.81015100  | -0.80290400 | H  | 2.03222800  | 0.06450200  | -1.14802900 |
| C | 1.23979400  | -3.11216200 | -0.28563700 | H  | 1.63497800  | 1.18886600  | -2.47834700 |
| H | 1.79613700  | -2.61872100 | 0.51870100  | H  | 1.46772400  | 1.70860800  | -0.78692800 |
| H | 1.51709000  | -4.17296200 | -0.31834800 | C  | 1.22930100  | -3.12577900 | -0.32556500 |
| H | 1.52306200  | -2.64260800 | -1.23358900 | H  | 1.78745700  | -2.62066700 | 0.47013300  |
| C | -1.31818000 | -3.91937900 | -1.31365900 | H  | 1.51269400  | -4.18510800 | -0.35009000 |
| H | -1.15531400 | -3.45720700 | -2.29154500 | H  | 1.50186100  | -2.66394300 | -1.28037900 |
| H | -0.88670800 | -4.92763900 | -1.32211200 | C  | -1.33708900 | -3.94376900 | -1.33217700 |
| H | -2.39715500 | -4.00121900 | -1.14572100 | H  | -1.17889600 | -3.48393000 | -2.31216400 |
| C | -0.81645000 | -3.98245800 | 1.48861000  | H  | -0.90711400 | -4.95260700 | -1.34034200 |
| H | -0.23750000 | -3.59375900 | 2.33090400  | H  | -2.41506200 | -4.02274200 | -1.15721600 |
| H | -1.87340400 | -3.97990900 | 1.77336600  | C  | -0.81284400 | -3.98595000 | 1.47473700  |
| H | -0.50121400 | -5.01054500 | 1.27372600  | H  | -0.23132700 | -3.58125500 | 2.30809600  |
|   |             |             |             | H  | -1.86824100 | -3.98399200 | 1.76514200  |
|   |             |             |             | H  | -0.49325500 | -5.01532000 | 1.27318800  |
|   |             |             |             | Cl | -1.92004300 | 2.54502000  | 1.66250700  |

### TS-1-2-Cl-PMe<sub>3</sub>

$$E = -2244.88655801$$

$$G_{\text{corr}} = 0.375799$$

|    |             |             |             |
|----|-------------|-------------|-------------|
| Ni | -1.23252900 | -0.77061800 | 0.35454000  |
| P  | -0.39112000 | 0.25867200  | -1.43565400 |
| P  | -0.57644300 | -2.90774000 | -0.00475400 |
| P  | -3.53626200 | -0.93447600 | -0.04528100 |
| C  | -0.81171000 | 0.42225500  | 1.71381400  |
| C  | -1.47089600 | -0.49380800 | 2.58062200  |
| C  | 0.55292000  | 0.73837300  | 1.94636900  |
| C  | -0.72318600 | -1.14949700 | 3.59695800  |
| H  | -2.55301100 | -0.53409500 | 2.63065500  |
| C  | 1.26169900  | 0.06361700  | 2.92740900  |
| H  | 1.03966300  | 1.49203100  | 1.33877400  |
| C  | 0.62776900  | -0.89436600 | 3.75400900  |
| H  | -1.23898100 | -1.82481500 | 4.27664800  |
| H  | 2.32172700  | 0.27205600  | 3.05724500  |
| H  | 1.19668800  | -1.39906200 | 4.53075000  |
| C  | -4.40836400 | -2.31869500 | 0.82307900  |
| H  | -4.25148300 | -2.22510400 | 1.90338200  |
| H  | -5.48661400 | -2.31816000 | 0.62057300  |
| H  | -3.98935900 | -3.27825100 | 0.50106900  |

### 2-I-PMe<sub>3</sub>

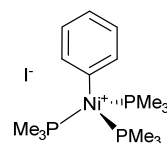

$$E = -1796.11261245$$

$$G_{\text{corr}} = 0.377983$$

|    |             |             |             |
|----|-------------|-------------|-------------|
| Ni | -1.34730500 | -1.28806300 | -0.05416300 |
| P  | 0.13800300  | -0.01722600 | -1.18121900 |
| P  | -0.74326100 | -3.31385500 | -0.98594800 |
| P  | -3.38744800 | -1.83341900 | 0.77960900  |
| C  | -1.40212600 | 0.17175600  | 1.21355600  |
| C  | -0.58311700 | -0.07766000 | 2.33232500  |
| C  | -2.13038100 | 1.37032500  | 1.19689000  |
| C  | -0.50799000 | 0.82572200  | 3.39705100  |
| H  | 0.00752700  | -0.99297300 | 2.37673000  |
| C  | -2.06431700 | 2.27712000  | 2.26125200  |
| H  | -2.74733200 | 1.61728900  | 0.33740200  |
| C  | -1.25519200 | 2.00708100  | 3.36738700  |

|   |             |             |             |   |             |             |             |
|---|-------------|-------------|-------------|---|-------------|-------------|-------------|
| H | 0.13665000  | 0.60906500  | 4.24593900  | C | 1.78079800  | 2.94429200  | -2.11336300 |
| H | -2.63841100 | 3.20024500  | 2.22009900  | H | 0.99525600  | 3.58972400  | -1.72597600 |
| H | -1.19802000 | 2.71332300  | 4.19147700  | C | 3.07396000  | 3.44542100  | -2.25396700 |
| C | -4.17399900 | -3.48258900 | 0.51731200  | H | 3.28586700  | 4.47609100  | -1.98256000 |
| H | -3.71755800 | -4.23001100 | 1.17070400  | C | 4.09701700  | 2.62168400  | -2.73590100 |
| H | -5.24152000 | -3.41777800 | 0.75658500  | H | 5.10676600  | 3.00982600  | -2.83720500 |
| H | -4.06660900 | -3.79909400 | -0.52460100 | C | 3.81472900  | 1.30185700  | -3.09310100 |
| C | -3.72250400 | -1.55861500 | 2.56705800  | H | 4.60250300  | 0.66018200  | -3.47853500 |
| H | -4.76834600 | -1.79599500 | 2.79056600  | C | 2.51625700  | 0.79919600  | -2.96166400 |
| H | -3.07293400 | -2.20615600 | 3.16517000  | H | 2.31275800  | -0.22656100 | -3.25384500 |
| H | -3.51828600 | -0.51916300 | 2.83195000  | C | -1.10451400 | 2.08001100  | -3.41792800 |
| C | -4.60170000 | -0.74448700 | -0.07742700 | H | -2.15989600 | 1.81491800  | -3.49785400 |
| H | -4.38939900 | 0.30462700  | 0.13486500  | H | -0.63204500 | 1.93687000  | -4.39520200 |
| H | -4.53288800 | -0.90699700 | -1.15836500 | H | -1.02745300 | 3.13158700  | -3.13450600 |
| H | -5.61960200 | -0.97687200 | 0.25492300  | C | -0.34322200 | -0.63801200 | -2.98027400 |
| C | 0.30723400  | -0.41278500 | -2.97778100 | H | -1.40116300 | -0.92107800 | -2.96527500 |
| H | 1.02730700  | 0.27255900  | -3.43854000 | H | 0.21637200  | -1.38598600 | -2.41389100 |
| H | 0.63944700  | -1.43776400 | -3.14998800 | H | 0.00159800  | -0.62032500 | -4.01913800 |
| H | -0.66661300 | -0.27684800 | -3.46050400 | C | 1.14716200  | -0.62951700 | 2.55119800  |
| C | -0.19920200 | 1.78606700  | -1.29012400 | C | 1.45641700  | 0.26353800  | 3.58868100  |
| H | -1.20804000 | 1.95713700  | -1.67873500 | H | 1.72115700  | 1.29385000  | 3.36992700  |
| H | -0.10791900 | 2.25107200  | -0.30809300 | C | 1.41400800  | -0.15529900 | 4.92019600  |
| H | 0.52949200  | 2.24314900  | -1.96761500 | H | 1.65607300  | 0.54785800  | 5.71276900  |
| C | 1.84127500  | -0.06956900 | -0.50175200 | C | 1.05762700  | -1.46874400 | 5.23213400  |
| H | 2.21464300  | -1.09595100 | -0.47971500 | H | 1.01822900  | -1.79257700 | 6.26864300  |
| H | 2.51211800  | 0.55459800  | -1.10033800 | C | 0.74916600  | -2.36439700 | 4.20474700  |
| H | 1.81716600  | 0.32185100  | 0.51907200  | H | 0.46676900  | -3.38728700 | 4.43845000  |
| C | 1.07512900  | -3.57170300 | -1.19335200 | C | 0.79524300  | -1.94965100 | 2.87368300  |
| H | 1.56618100  | -3.46228800 | -0.22087100 | H | 0.53333300  | -2.65521100 | 2.09190400  |
| H | 1.25544700  | -4.58580200 | -1.56707500 | C | 1.86088200  | -1.47795700 | -0.10595000 |
| H | 1.51918100  | -2.86034200 | -1.89179100 | H | 1.14105000  | -2.29705100 | -0.18802700 |
| C | -1.42120800 | -3.78217700 | -2.63240800 | H | 2.75963100  | -1.83314900 | 0.40818900  |
| H | -1.10520100 | -3.05097000 | -3.38243100 | H | 2.13178600  | -1.14390100 | -1.11082000 |
| H | -1.07147600 | -4.77688400 | -2.93058100 | C | 2.47007900  | 1.19390400  | 0.77180600  |
| H | -2.51570500 | -3.78386200 | -2.59297000 | H | 2.10410600  | 2.16724100  | 1.10966700  |
| C | -1.12546400 | -4.79071300 | 0.05803300  | H | 2.84129300  | 1.29838900  | -0.24767800 |
| H | -0.96087900 | -4.55301400 | 1.11387900  | H | 3.29189900  | 0.87031300  | 1.41792400  |
| H | -2.15987700 | -5.10749500 | -0.07955400 | C | -2.92560300 | 3.11716200  | -1.01631200 |
| H | -0.47011100 | -5.62201600 | -0.22415700 | C | -3.84648100 | 3.63320000  | -1.93768500 |
| I | 2.81328000  | 3.68537600  | 0.96125000  | H | -4.64668700 | 3.01278400  | -2.32889900 |

## 2-I-PMe<sub>2</sub>Ph

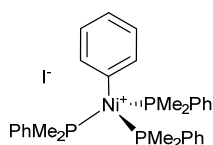

$$E = -2371.42764175$$

$$G_{\text{corr}} = 0.528074$$

|    |             |             |             |
|----|-------------|-------------|-------------|
| Ni | -0.93316700 | 0.61845000  | -0.00635200 |
| P  | -0.22208100 | 1.02092400  | -2.19260500 |
| P  | 1.11506900  | -0.05969100 | 0.80551100  |
| P  | -2.99989100 | 1.40368700  | -0.37598200 |
| C  | 1.49144800  | 1.61233000  | -2.45954500 |

|   |             |             |             |
|---|-------------|-------------|-------------|
| C | 1.78079800  | 2.94429200  | -2.11336300 |
| H | 0.99525600  | 3.58972400  | -1.72597600 |
| C | 3.07396000  | 3.44542100  | -2.25396700 |
| H | 3.28586700  | 4.47609100  | -1.98256000 |
| C | 4.09701700  | 2.62168400  | -2.73590100 |
| H | 5.10676600  | 3.00982600  | -2.83720500 |
| C | 3.81472900  | 1.30185700  | -3.09310100 |
| H | 4.60250300  | 0.66018200  | -3.47853500 |
| C | 2.51625700  | 0.79919600  | -2.96166400 |
| H | 2.31275800  | -0.22656100 | -3.25384500 |
| C | -1.10451400 | 2.08001100  | -3.41792800 |
| H | -2.15989600 | 1.81491800  | -3.49785400 |
| H | -0.63204500 | 1.93687000  | -4.39520200 |
| H | -1.02745300 | 3.13158700  | -3.13450600 |
| C | -0.34322200 | -0.63801200 | -2.98027400 |
| H | -1.40116300 | -0.92107800 | -2.96527500 |
| H | 0.21637200  | -1.38598600 | -2.41389100 |
| H | 0.00159800  | -0.62032500 | -4.01913800 |
| C | 1.14716200  | -0.62951700 | 2.55119800  |
| C | 1.45641700  | 0.26353800  | 3.58868100  |
| H | 1.72115700  | 1.29385000  | 3.36992700  |
| C | 1.41400800  | -0.15529900 | 4.92019600  |
| H | 1.65607300  | 0.54785800  | 5.71276900  |
| C | 1.05762700  | -1.46874400 | 5.23213400  |
| H | 1.01822900  | -1.79257700 | 6.26864300  |
| C | 0.74916600  | -2.36439700 | 4.20474700  |
| H | 0.46676900  | -3.38728700 | 4.43845000  |
| C | 0.79524300  | -1.94965100 | 2.87368300  |
| H | 0.53333300  | -2.65521100 | 2.09190400  |
| C | 1.86088200  | -1.47795700 | -0.10595000 |
| H | 1.14105000  | -2.29705100 | -0.18802700 |
| H | 2.75963100  | -1.83314900 | 0.40818900  |
| H | 2.13178600  | -1.14390100 | -1.11082000 |
| C | 2.47007900  | 1.19390400  | 0.77180600  |
| H | 2.10410600  | 2.16724100  | 1.10966700  |
| H | 2.84129300  | 1.29838900  | -0.24767800 |
| H | 3.29189900  | 0.87031300  | 1.41792400  |
| C | -2.92560300 | 3.11716200  | -1.01631200 |
| C | -3.84648100 | 3.63320000  | -1.93768500 |
| H | -4.64668700 | 3.01278400  | -2.32889900 |
| C | -3.71454600 | 4.94686000  | -2.39407000 |
| H | -4.42205500 | 5.33409000  | -3.12193600 |
| C | -2.67299200 | 5.75393500  | -1.92877200 |
| H | -2.57251200 | 6.77349900  | -2.29092300 |
| C | -1.75649100 | 5.24725500  | -1.00150900 |
| H | -0.94298900 | 5.87046400  | -0.63946700 |
| C | -1.87977500 | 3.93191500  | -0.55199900 |
| H | -1.14997600 | 3.52088600  | 0.14385500  |
| C | -4.20131000 | 1.56148100  | 1.00890000  |
| H | -4.44505300 | 0.57375100  | 1.40761400  |
| H | -5.10956400 | 2.04289900  | 0.63083400  |
| H | -3.77444200 | 2.17114000  | 1.80917200  |
| C | -3.93471200 | 0.37476000  | -1.57178800 |
| H | -4.00956700 | -0.63156400 | -1.14541300 |
| H | -3.41764900 | 0.31391800  | -2.53077600 |

|   |             |             |             |
|---|-------------|-------------|-------------|
| H | -4.94369100 | 0.76398300  | -1.73494300 |
| C | -1.73308900 | -0.22470700 | 1.52769500  |
| C | -2.26207200 | -1.51159100 | 1.32920100  |
| C | -1.81720100 | 0.32846600  | 2.81520800  |
| C | -2.84055300 | -2.22892000 | 2.38429000  |
| H | -2.22579800 | -1.96406100 | 0.33889500  |
| C | -2.39034200 | -0.38235700 | 3.87240400  |
| H | -1.41541100 | 1.32170600  | 3.00190900  |
| C | -2.90406000 | -1.66633400 | 3.66151800  |
| H | -3.23924500 | -3.22563300 | 2.20631500  |
| H | -2.43136800 | 0.06321800  | 4.86391100  |
| H | -3.34887200 | -2.22097100 | 4.48389400  |
| I | -4.74170800 | 1.36343400  | -5.45802900 |

## 2-I-PMePh<sub>2</sub>

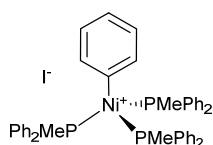

$$E = -2946.88279278$$

$$G_{\text{corr}} = 0.674795$$

|    |             |             |             |
|----|-------------|-------------|-------------|
| Ni | 9.47698500  | 10.32069500 | 4.06894500  |
| P  | 10.06328100 | 11.20336200 | 2.04354300  |
| C  | 8.80627800  | 11.80614100 | 0.83337800  |
| C  | 8.42108500  | 13.15634000 | 0.82308500  |
| H  | 8.86331700  | 13.86140400 | 1.51845800  |
| C  | 7.44745700  | 13.60800500 | -0.06972400 |
| H  | 7.15909800  | 14.65531900 | -0.05830100 |
| C  | 6.84264300  | 12.72009400 | -0.96165800 |
| H  | 6.08412800  | 13.07365600 | -1.65474000 |
| C  | 7.22133100  | 11.37481000 | -0.96096400 |
| H  | 6.76247900  | 10.67705400 | -1.65641000 |
| C  | 8.19665500  | 10.92033400 | -0.07163900 |
| H  | 8.48402400  | 9.87361500  | -0.09053500 |
| C  | 10.86761100 | 9.83067600  | 1.12892900  |
| C  | 10.39771800 | 8.52468500  | 1.34359600  |
| H  | 9.59091200  | 8.35556500  | 2.05316100  |
| C  | 10.98051200 | 7.44385500  | 0.68124500  |
| H  | 10.61173500 | 6.43717000  | 0.85800600  |
| C  | 12.04740400 | 7.65819800  | -0.19585800 |
| H  | 12.51093800 | 6.81750300  | -0.70473200 |
| C  | 12.52052800 | 8.95493400  | -0.41360500 |
| H  | 13.35159600 | 9.12448400  | -1.09280000 |
| C  | 11.93129800 | 10.03917800 | 0.24080200  |
| H  | 12.31030400 | 11.04074000 | 0.06186000  |
| C  | 11.28020400 | 12.58127900 | 2.08404100  |
| H  | 11.45610200 | 12.98274200 | 1.08249500  |
| H  | 12.21570800 | 12.21937700 | 2.51448200  |
| H  | 10.88782000 | 13.37460700 | 2.72585400  |
| P  | 7.23491000  | 10.94998900 | 4.04994400  |
| C  | 6.31666000  | 10.72214100 | 5.62798400  |
| C  | 6.74772400  | 11.43926700 | 6.75636800  |
| H  | 7.58848900  | 12.12449000 | 6.68716800  |

|   |             |             |            |
|---|-------------|-------------|------------|
| C | 6.10323300  | 11.27890200 | 7.98283200 |
| H | 6.45245900  | 11.84106500 | 8.84451500 |
| C | 5.02018200  | 10.40164300 | 8.09663400 |
| H | 4.51853400  | 10.27526000 | 9.05232000 |
| C | 4.58552200  | 9.68877100  | 6.97738100 |
| H | 3.74884100  | 9.00012500  | 7.05830200 |
| C | 5.22863600  | 9.84641700  | 5.74713800 |
| H | 4.88675700  | 9.26838700  | 4.89574600 |
| C | 7.21253800  | 12.77911900 | 3.85917100 |
| C | 6.11903200  | 13.46492600 | 3.31016600 |
| H | 5.24726600  | 12.92357100 | 2.95658300 |
| C | 6.14890300  | 14.85550900 | 3.19634900 |
| H | 5.30108700  | 15.37685100 | 2.76001800 |
| C | 7.26320700  | 15.57553100 | 3.63847800 |
| H | 7.28159600  | 16.65834500 | 3.54962100 |
| C | 8.34882600  | 14.90077800 | 4.20175100 |
| H | 9.21286700  | 15.45089500 | 4.56259300 |
| C | 8.32456300  | 13.50874100 | 4.30678000 |
| H | 9.17570900  | 12.99153300 | 4.73967400 |
| C | 6.08185600  | 10.32207900 | 2.76310700 |
| H | 5.06305000  | 10.68741600 | 2.91942100 |
| H | 6.07094900  | 9.22982900  | 2.78576700 |
| H | 6.43613300  | 10.64816400 | 1.78330600 |
| P | 9.42633400  | 8.77091800  | 5.70288600 |
| C | 10.76888300 | 7.51995600  | 5.55414600 |
| C | 11.86240200 | 7.51423500  | 6.43167900 |
| H | 11.91819700 | 8.22215000  | 7.25173100 |
| C | 12.91326400 | 6.61388900  | 6.24209300 |
| H | 13.75558200 | 6.62321100  | 6.92857500 |
| C | 12.88751900 | 5.71520700  | 5.17392500 |
| H | 13.70866800 | 5.01918000  | 5.02551700 |
| C | 11.79991100 | 5.71506600  | 4.29594600 |
| H | 11.77081200 | 5.01909800  | 3.46172100 |
| C | 10.74781000 | 6.61097700  | 4.48458900 |
| H | 9.91209500  | 6.59931600  | 3.79208300 |
| C | 7.91671300  | 7.72570900  | 5.66471700 |
| C | 7.38104100  | 7.39056200  | 4.41055800 |
| H | 7.84308200  | 7.78481500  | 3.50874300 |
| C | 6.25606900  | 6.57109500  | 4.31395300 |
| H | 5.85209200  | 6.31825600  | 3.33727200 |
| C | 5.64669000  | 6.08724300  | 5.47527100 |
| H | 4.76497600  | 5.45617600  | 5.40513300 |
| C | 6.17045500  | 6.42145900  | 6.72662700 |
| H | 5.69517400  | 6.05332700  | 7.63167500 |
| C | 7.30312600  | 7.23305200  | 6.82440900 |
| H | 7.69071200  | 7.48856900  | 7.80545300 |
| C | 9.56129200  | 9.41653700  | 7.41090900 |
| H | 9.72192700  | 8.61385300  | 8.13618900 |
| H | 8.64365300  | 9.95434000  | 7.65683300 |
| H | 10.39466500 | 10.12159500 | 7.45611300 |
| C | 11.39306200 | 10.42719000 | 4.45787000 |
| C | 11.70278400 | 11.45595700 | 5.36737400 |
| C | 12.45279500 | 9.66544700  | 3.94390100 |
| C | 13.02500500 | 11.72399000 | 5.73799300 |
| H | 10.91090300 | 12.05322100 | 5.81404200 |

|   |             |             |            |
|---|-------------|-------------|------------|
| C | 13.77761500 | 9.93459500  | 4.30476000 |
| H | 12.25141600 | 8.84491600  | 3.26391700 |
| C | 14.07015100 | 10.96697000 | 5.20071200 |
| H | 13.22820400 | 12.52188700 | 6.44893500 |
| H | 14.58013300 | 9.32734800  | 3.89121300 |
| H | 15.09932400 | 11.17278100 | 5.48485100 |
| I | 9.81287400  | 13.92470900 | 8.17378800 |

## 2-I-PPh<sub>3</sub>

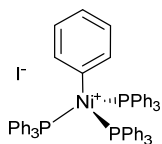

$$E = -3522.24185588$$

$$G_{\text{corr}} = 0.824754$$

|    |             |             |             |
|----|-------------|-------------|-------------|
| Ni | 9.35558800  | 10.48196500 | 4.19095400  |
| P  | 9.33806700  | 10.20429700 | 1.79316600  |
| C  | 7.96021900  | 9.26553800  | 1.03570300  |
| C  | 6.75999300  | 9.90573200  | 0.68930600  |
| H  | 6.67119500  | 10.98238100 | 0.76271200  |
| C  | 5.66271600  | 9.16006700  | 0.25446200  |
| H  | 4.74295500  | 9.67392600  | -0.01081700 |
| C  | 5.74405200  | 7.76823300  | 0.17010100  |
| H  | 4.88745200  | 7.18989500  | -0.16507500 |
| C  | 6.92974900  | 7.12287300  | 0.52949300  |
| H  | 7.00074900  | 6.03973600  | 0.48038800  |
| C  | 8.02848900  | 7.86321200  | 0.96506700  |
| H  | 8.93483300  | 7.34402000  | 1.25447900  |
| C  | 10.89720200 | 9.46296200  | 1.13876800  |
| C  | 12.09362300 | 9.81321300  | 1.78020900  |
| H  | 12.06879800 | 10.40696400 | 2.68702200  |
| C  | 13.32454900 | 9.41092100  | 1.26398900  |
| H  | 14.23660900 | 9.67395500  | 1.79073000  |
| C  | 13.37259200 | 8.63978400  | 0.10081400  |
| H  | 14.32958700 | 8.31063000  | -0.29470700 |
| C  | 12.18677800 | 8.29392000  | -0.55149900 |
| H  | 12.21676800 | 7.70324600  | -1.46330800 |
| C  | 10.95417000 | 8.71282800  | -0.04562100 |
| H  | 10.04719400 | 8.45724500  | -0.58271600 |
| P  | 8.04590200  | 12.38190700 | 4.44131000  |
| C  | 7.09975100  | 12.24380700 | 6.02106800  |
| C  | 6.86620500  | 13.33692000 | 6.86596200  |
| H  | 7.25012000  | 14.31984900 | 6.61613100  |
| C  | 6.14643600  | 13.16785300 | 8.05203200  |
| H  | 5.97861200  | 14.02306300 | 8.70103400  |
| C  | 5.64975200  | 11.91157900 | 8.40592500  |
| H  | 5.09282800  | 11.78504400 | 9.33023400  |
| C  | 5.88304400  | 10.81568500 | 7.57066000  |
| H  | 5.51540200  | 9.82962500  | 7.84167200  |
| C  | 6.61042300  | 10.98117000 | 6.39299400  |
| H  | 6.82715900  | 10.11817200 | 5.77501000  |
| C  | 8.83714300  | 14.03860000 | 4.51089100  |
| C  | 8.10737100  | 15.22525200 | 4.32243300  |

|   |             |             |             |
|---|-------------|-------------|-------------|
| H | 7.04216500  | 15.18746700 | 4.11804000  |
| C | 8.74761800  | 16.46347600 | 4.38881700  |
| H | 8.17374600  | 17.37319100 | 4.23476600  |
| C | 10.11855000 | 16.53340600 | 4.65202300  |
| H | 10.61529900 | 17.49863700 | 4.69962100  |
| C | 10.84696700 | 15.35922000 | 4.85643400  |
| H | 11.91197600 | 15.40314100 | 5.06682400  |
| C | 10.21050200 | 14.11893500 | 4.78675200  |
| H | 10.78320700 | 13.21277600 | 4.94473900  |
| P | 9.29762900  | 8.26094700  | 4.78439400  |
| C | 10.40071800 | 7.10217600  | 3.88040300  |
| C | 11.77144800 | 7.40577000  | 3.83196800  |
| H | 12.15872500 | 8.29896200  | 4.31275400  |
| C | 12.65761400 | 6.56899400  | 3.15319100  |
| H | 13.71202300 | 6.82592300  | 3.13266200  |
| C | 12.18320600 | 5.43529600  | 2.49110000  |
| H | 12.87236000 | 4.79292400  | 1.94967000  |
| C | 10.81904400 | 5.13517800  | 2.51930400  |
| H | 10.44058700 | 4.25818400  | 2.00070400  |
| C | 9.93082600  | 5.95882700  | 3.21342600  |
| H | 8.87545000  | 5.71215500  | 3.21699500  |
| C | 7.57902700  | 7.64624600  | 4.53624400  |
| C | 6.62033500  | 8.45692200  | 3.91284900  |
| H | 6.89426800  | 9.43961100  | 3.54904000  |
| C | 5.30540000  | 8.01510200  | 3.75644600  |
| H | 4.57989000  | 8.65993900  | 3.26970700  |
| C | 4.93614700  | 6.74987000  | 4.21461500  |
| H | 3.91466600  | 6.40091400  | 4.08961500  |
| C | 5.88291400  | 5.93249400  | 4.84119600  |
| H | 5.59909100  | 4.94913700  | 5.20580700  |
| C | 7.19346900  | 6.37884100  | 5.01010700  |
| H | 7.91473100  | 5.74456500  | 5.51682800  |
| C | 9.58452000  | 7.90507700  | 6.57131100  |
| C | 10.86257600 | 7.60673200  | 7.06489000  |
| C | 8.52453300  | 8.06961300  | 7.47848600  |
| C | 11.07343200 | 7.47630200  | 8.43875900  |
| H | 11.70226900 | 7.48055600  | 6.39174900  |
| C | 8.73863900  | 7.93428400  | 8.84990600  |
| H | 7.53023200  | 8.31331200  | 7.12094000  |
| C | 10.01539900 | 7.64173400  | 9.33514800  |
| H | 12.07079500 | 7.24810000  | 8.80418600  |
| H | 7.90759500  | 8.06725400  | 9.53760300  |
| H | 10.18502500 | 7.54333600  | 10.40396900 |
| C | 6.67956600  | 12.56409200 | 3.19951100  |
| C | 6.83045000  | 13.37612200 | 2.06206900  |
| C | 5.47541500  | 11.85705700 | 3.36363600  |
| C | 5.79883500  | 13.48971900 | 1.12777100  |
| H | 7.74619300  | 13.93096800 | 1.89960500  |
| C | 4.44953100  | 11.96674100 | 2.42354900  |
| H | 5.32103700  | 11.22525000 | 4.23070800  |
| C | 4.60456400  | 12.78695300 | 1.30366400  |
| H | 5.93816800  | 14.12725000 | 0.25933600  |
| H | 3.52548800  | 11.41529300 | 2.57471400  |
| H | 3.80354500  | 12.87681300 | 0.57503700  |
| C | 9.45268300  | 11.83337500 | 0.94571900  |

|   |             |             |             |
|---|-------------|-------------|-------------|
| C | 10.18258300 | 12.82161100 | 1.62179700  |
| C | 8.95366100  | 12.10261000 | -0.33528100 |
| C | 10.37649400 | 14.07891900 | 1.04972600  |
| H | 10.58293500 | 12.60885300 | 2.60801100  |
| C | 9.14019200  | 13.36446300 | -0.90392900 |
| H | 8.41293600  | 11.34053400 | -0.88698000 |
| C | 9.84235300  | 14.35611700 | -0.21165900 |
| H | 10.92543500 | 14.84008100 | 1.59695000  |
| H | 8.73708700  | 13.57204400 | -1.89150100 |
| H | 9.97857800  | 15.33753600 | -0.65758500 |
| C | 10.29692000 | 10.84724400 | 5.84082200  |
| C | 9.88322800  | 11.06101000 | 7.15975600  |
| C | 11.67531400 | 10.91487700 | 5.56393300  |
| C | 10.80842300 | 11.36991200 | 8.16368300  |
| H | 8.84090200  | 10.96629200 | 7.43094800  |
| C | 12.60294300 | 11.22961500 | 6.56329600  |
| H | 12.05447400 | 10.71609500 | 4.56488400  |
| C | 12.16990800 | 11.46515000 | 7.86977600  |
| H | 10.45676900 | 11.52515800 | 9.18136700  |
| H | 13.65995200 | 11.26353200 | 6.31408800  |
| H | 12.88804100 | 11.69946500 | 8.65141100  |
| I | 15.56255500 | 9.03535600  | 4.75823300  |

### 2-Br-PMe<sub>3</sub>

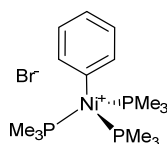

|                   |   |                                     |
|-------------------|---|-------------------------------------|
| E                 | = | -1797.88492862                      |
| G <sub>corr</sub> | = | 0.379868                            |
| Ni                |   | -1.32885000 -1.27301000 -0.04172500 |
| P                 |   | 0.20292200 -0.14652300 -1.23590700  |
| P                 |   | -0.87418800 -3.36374000 -0.90011100 |
| P                 |   | -3.42015100 -1.63019400 0.77462500  |
| C                 |   | -1.25284400 0.20514100 1.20714700   |
| C                 |   | -0.47441800 -0.11853500 2.33617000  |
| C                 |   | -1.88761100 1.45534300 1.19442200   |
| Br                |   | 2.69629100 3.31741200 0.66042400    |
| C                 |   | -0.36906200 0.75358300 3.42425100   |
| H                 |   | 0.05279800 -1.07220900 2.37381000   |
| C                 |   | -1.78737100 2.33372800 2.28009300   |
| H                 |   | -2.46682400 1.76182200 0.32812300   |
| C                 |   | -1.03625400 1.98235200 3.40426700   |
| H                 |   | 0.23640300 0.47521800 4.28411300    |
| H                 |   | -2.29350300 3.29595800 2.24360900   |
| H                 |   | -0.95638800 2.66400500 4.24700000   |
| C                 |   | -4.34160100 -3.21791200 0.58274300  |
| H                 |   | -3.97045800 -3.96127900 1.29313500  |
| H                 |   | -5.40466000 -3.04381500 0.78369600  |
| H                 |   | -4.23552000 -3.60490400 -0.43505000 |
| C                 |   | -3.78404900 -1.22210900 2.53140800  |
| H                 |   | -4.84910200 -1.37713200 2.73658300  |
| H                 |   | -3.19529100 -1.87180300 3.18710700  |

|   |             |             |             |
|---|-------------|-------------|-------------|
| H | -3.51923500 | -0.18352000 | 2.74081700  |
| C | -4.50769000 | -0.49347800 | -0.18506100 |
| H | -4.16326200 | 0.53766000  | -0.08592700 |
| H | -4.47383300 | -0.77398000 | -1.24336900 |
| H | -5.54197100 | -0.56287300 | 0.17031300  |
| C | 0.30829700  | -0.65782500 | -3.00936900 |
| H | 1.04754100  | -0.03484300 | -3.52519900 |
| H | 0.59150700  | -1.70512100 | -3.12700800 |
| H | -0.66919600 | -0.50673600 | -3.47989600 |
| C | -0.06454900 | 1.65830500  | -1.44176900 |
| H | -1.09584100 | 1.84923600  | -1.75548500 |
| H | 0.14818800  | 2.18465000  | -0.50979800 |
| H | 0.62015400  | 2.03415900  | -2.20915600 |
| C | 1.91563800  | -0.25285800 | -0.58759700 |
| H | 2.16493100  | -1.28617800 | -0.33410000 |
| H | 2.62872200  | 0.13005000  | -1.32481800 |
| H | 1.98860500  | 0.37485500  | 0.30564900  |
| C | 0.92668800  | -3.74242100 | -1.07265900 |
| H | 1.39957500  | -3.66426900 | -0.08803600 |
| H | 1.05246000  | -4.76564300 | -1.44367300 |
| H | 1.43185300  | -3.05713100 | -1.75559800 |
| C | -1.57884400 | -3.86745200 | -2.52466800 |
| H | -1.20206500 | -3.21101400 | -3.31416700 |
| H | -1.31227900 | -4.90387900 | -2.76038700 |
| H | -2.66974800 | -3.77659400 | -2.49376900 |
| C | -1.36109200 | -4.75926900 | 0.20736100  |
| H | -1.15334800 | -4.49717000 | 1.24987000  |
| H | -2.42308700 | -4.98396300 | 0.10305400  |
| H | -0.79024100 | -5.65686500 | -0.05449800 |

### 2-Cl-PMe<sub>3</sub>

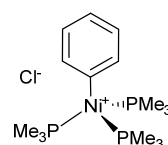

|                   |   |                                     |
|-------------------|---|-------------------------------------|
| E                 | = | -2244.9507208                       |
| G <sub>corr</sub> | = | 0.382069                            |
| Ni                |   | -1.31385700 -1.15926500 -0.02597300 |
| P                 |   | 0.87190400 -0.66263600 -0.52962100  |
| P                 |   | -1.50140100 -2.82142200 -1.61872800 |
| P                 |   | -3.40213100 -1.33931800 0.86406500  |
| C                 |   | -1.04602300 0.14308100 1.37975500   |
| C                 |   | -0.64618800 -0.24063400 2.67265600  |
| C                 |   | -1.24315900 1.51413100 1.13611300   |
| C                 |   | -0.44766500 0.70524400 3.68470100   |
| H                 |   | -0.48415000 -1.29443200 2.89514900  |
| C                 |   | -1.03507300 2.46586500 2.14035700   |
| H                 |   | -1.57898700 1.82723100 0.14973500   |
| C                 |   | -0.63699500 2.06569800 3.42057000   |
| H                 |   | -0.14074000 0.38177600 4.67773100   |
| H                 |   | -1.19220100 3.52142100 1.92576400   |
| H                 |   | -0.47989100 2.80407900 4.20331800   |
| C                 |   | -3.46710800 -2.77354900 2.02137300  |

|    |             |             |             |
|----|-------------|-------------|-------------|
| H  | -2.73170800 | -2.62414100 | 2.81906200  |
| H  | -4.46187700 | -2.88325400 | 2.46841600  |
| H  | -3.21061300 | -3.69231500 | 1.48364200  |
| C  | -4.02328500 | 0.03787400  | 1.92121400  |
| H  | -5.01781500 | -0.22354700 | 2.29968000  |
| H  | -3.35095300 | 0.22245000  | 2.76053200  |
| H  | -4.09465100 | 0.94976900  | 1.32131000  |
| C  | -4.87351300 | -1.58555400 | -0.22447900 |
| H  | -4.73343600 | -0.99053900 | -1.13103100 |
| H  | -5.00384100 | -2.63660800 | -0.48378900 |
| H  | -5.77379400 | -1.24765700 | 0.29980100  |
| C  | 2.06114500  | -1.88818400 | -1.24685900 |
| H  | 2.98984900  | -1.36955500 | -1.51021800 |
| H  | 2.29221800  | -2.65228400 | -0.49744600 |
| H  | 1.67555200  | -2.37963600 | -2.14168400 |
| C  | 0.87231700  | 0.69348700  | -1.77115100 |
| H  | 0.30067900  | 0.39382400  | -2.65204000 |
| H  | 0.37927200  | 1.56670500  | -1.33641300 |
| H  | 1.89819800  | 0.95519400  | -2.05504200 |
| C  | 1.95775600  | 0.01810400  | 0.79742400  |
| H  | 2.05401000  | -0.70455800 | 1.61293100  |
| H  | 2.94988400  | 0.22045700  | 0.37853800  |
| H  | 1.53955600  | 0.94248000  | 1.19943000  |
| C  | -1.00237500 | -2.30761200 | -3.31676700 |
| H  | 0.00448600  | -1.88636300 | -3.34100700 |
| H  | -1.05097000 | -3.15705300 | -4.00781800 |
| H  | -1.70066300 | -1.52537500 | -3.62915300 |
| C  | -3.09176800 | -3.66586200 | -2.02131300 |
| H  | -3.80594600 | -2.95359600 | -2.43965900 |
| H  | -2.90017800 | -4.44996100 | -2.76296100 |
| H  | -3.51814100 | -4.12966900 | -1.12755200 |
| C  | -0.47920200 | -4.31413200 | -1.23834000 |
| H  | 0.55240700  | -4.05168500 | -1.00078700 |
| H  | -0.90888700 | -4.81262900 | -0.36176000 |
| H  | -0.48608800 | -5.01724100 | -2.07927600 |
| Cl | -2.83582000 | 0.67862500  | -2.23140800 |

### 3-I-PMe<sub>3</sub>

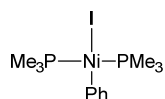

|                   |             |                |             |
|-------------------|-------------|----------------|-------------|
| E                 | =           | -1334.92584591 |             |
| G <sub>corr</sub> | =           | 0.268058       |             |
| Ni                | -1.11476700 | 0.34353300     | -0.80171100 |
| P                 | -2.83254200 | 1.74712700     | -0.38873500 |
| C                 | -4.00662500 | 0.92538200     | 0.76281300  |
| C                 | -3.88587800 | 2.27764000     | -1.80325600 |
| C                 | -2.49905500 | 3.35681700     | 0.43969900  |
| H                 | -4.84991500 | 1.58086500     | 1.00756600  |
| H                 | -3.47554500 | 0.66042300     | 1.68321000  |
| H                 | -4.66215500 | 2.97009300     | -1.45845000 |
| H                 | -4.35282900 | 1.40770400     | -2.27045600 |
| H                 | -1.83979900 | 3.96578500     | -0.18646000 |

|   |             |             |             |
|---|-------------|-------------|-------------|
| H | -2.00807800 | 3.19413800  | 1.40200500  |
| P | 0.67196600  | -1.01929300 | -1.00227300 |
| C | 1.20444200  | -1.43400100 | -2.71524700 |
| C | 2.26611400  | -0.53010400 | -0.22479400 |
| C | 0.33173900  | -2.65216500 | -0.22606000 |
| H | 1.50239900  | -0.51567800 | -3.23271500 |
| H | 0.37503800  | -1.88799600 | -3.26277500 |
| H | 2.62661500  | 0.40042500  | -0.67276500 |
| H | 3.01206500  | -1.31778000 | -0.37822100 |
| H | 0.08847000  | -2.50008300 | 0.83094700  |
| H | 1.20153800  | -3.31416100 | -0.30369400 |
| H | -4.37744700 | 0.00685200  | 0.29839000  |
| H | -3.26325900 | 2.78024000  | -2.55092300 |
| H | -3.44119600 | 3.89392800  | 0.59659400  |
| H | 2.05372800  | -2.12634000 | -2.69588600 |
| H | 2.12586500  | -0.36330300 | 0.84626900  |
| H | -0.52734600 | -3.11633300 | -0.71862200 |
| C | -0.15254900 | 1.29019700  | 0.52112300  |
| C | -0.26054300 | 0.91129300  | 1.87044600  |
| C | 0.43879600  | 1.59412800  | 2.87347000  |
| C | 1.26406700  | 2.67393200  | 2.54440800  |
| C | 1.38251300  | 3.06221400  | 1.20580200  |
| C | 0.68143200  | 2.37678600  | 0.20850500  |
| H | -0.90022700 | 0.07401900  | 2.14459000  |
| H | 0.33846200  | 1.28235600  | 3.91130400  |
| H | 1.80787900  | 3.20608300  | 3.32099000  |
| H | 2.02175900  | 3.90131500  | 0.93810200  |
| H | 0.78509800  | 2.69294300  | -0.82780600 |
| I | -2.57756700 | -1.17052900 | -2.44665100 |

### 3-I-PMe<sub>2</sub>Ph

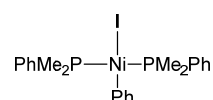

|                   |             |                |             |
|-------------------|-------------|----------------|-------------|
| E                 | =           | -1718.51055427 |             |
| G <sub>corr</sub> | =           | 0.367239       |             |
| Ni                | -0.88779600 | 1.28886800     | 0.17164000  |
| P                 | -1.92336000 | 0.82913900     | -1.78754000 |
| P                 | 0.26010600  | 1.35214600     | 2.12148600  |
| C                 | -0.67528100 | 0.97875500     | -3.12273600 |
| C                 | 0.17869600  | 2.09458200     | -3.08611000 |
| H                 | 0.07412500  | 2.82157300     | -2.28383300 |
| C                 | 1.16445900  | 2.26221000     | -4.05888300 |
| H                 | 1.81846800  | 3.12936100     | -4.02106900 |
| C                 | 1.31626700  | 1.31002200     | -5.07201300 |
| H                 | 2.08868300  | 1.43527000     | -5.82615300 |
| C                 | 0.47624200  | 0.19482700     | -5.10936500 |
| H                 | 0.59386700  | -0.55021000    | -5.89191200 |
| C                 | -0.51654700 | 0.02775000     | -4.13975100 |
| H                 | -1.15528700 | -0.84925400    | -4.17888600 |
| C                 | -3.30824500 | 1.89345700     | -2.38107900 |
| H                 | -4.11875700 | 1.87470800     | -1.64533200 |
| H                 | -3.67703700 | 1.52215900     | -3.34353200 |

|   |             |             |             |   |             |             |             |
|---|-------------|-------------|-------------|---|-------------|-------------|-------------|
| H | -2.96523600 | 2.92386300  | -2.49482700 | H | -0.85929600 | -0.71651200 | -5.95666500 |
| C | -2.66097000 | -0.84540100 | -1.96651600 | C | 0.16694300  | -0.11053300 | -4.16546000 |
| H | -3.37488400 | -0.99081900 | -1.14915000 | H | 0.49602000  | -1.11775700 | -3.93265000 |
| H | -1.89174700 | -1.61607000 | -1.89342700 | P | -1.64881200 | 1.91993700  | 1.32409500  |
| H | -3.19204100 | -0.93927300 | -2.91917200 | C | -2.53698900 | 3.20179400  | 0.35907200  |
| C | -0.74057700 | 0.45272400  | 3.36839800  | C | -2.70189200 | 2.99081300  | -1.02110200 |
| C | -2.11951100 | 0.72377300  | 3.40708900  | C | -3.02546600 | 4.38427800  | 0.93415000  |
| H | -2.54218400 | 1.44772000  | 2.71415900  | C | -3.34331000 | 3.94576800  | -1.81030600 |
| C | -2.94526900 | 0.06053800  | 4.31509500  | H | -2.31910900 | 2.08136000  | -1.47616500 |
| H | -4.00955900 | 0.27958400  | 4.33633200  | C | -3.66543400 | 5.33960900  | 0.14042800  |
| C | -2.40512000 | -0.89018000 | 5.18704500  | H | -2.90872200 | 4.57015300  | 1.99726000  |
| H | -3.04869500 | -1.41293900 | 5.88961000  | C | -3.82457700 | 5.12336500  | -1.23076800 |
| C | -1.03722900 | -1.16952100 | 5.14929900  | H | -3.45904100 | 3.77006000  | -2.87640100 |
| H | -0.61333600 | -1.91059800 | 5.82194200  | H | -4.03749300 | 6.25394500  | 0.59497900  |
| C | -0.20644700 | -0.50179600 | 4.24501200  | H | -4.31958300 | 5.87072000  | -1.84522100 |
| H | 0.85305700  | -0.73741600 | 4.22634800  | C | 0.99270800  | 2.54184100  | 0.50622100  |
| C | 1.92462100  | 0.57195000  | 2.14644100  | C | 1.99885500  | 2.30174600  | 1.45884700  |
| H | 1.86061600  | -0.48950200 | 1.90095000  | H | 2.15173200  | 1.29291700  | 1.83856700  |
| H | 2.40016800  | 0.69913700  | 3.12415800  | C | 2.81231800  | 3.33790700  | 1.92999500  |
| H | 2.54105900  | 1.06613500  | 1.38830000  | H | 3.58366200  | 3.12686800  | 2.66803500  |
| C | 0.61216400  | 2.96358700  | 2.94520800  | C | 0.83268500  | 3.85612300  | 0.03627600  |
| H | -0.32225000 | 3.48455000  | 3.16372400  | H | 0.05976600  | 4.07476300  | -0.69649800 |
| H | 1.21182800  | 3.58905000  | 2.27601100  | C | 2.63609800  | 4.64213700  | 1.45598800  |
| H | 1.16223600  | 2.79221700  | 3.87704000  | H | 3.26658000  | 5.44889200  | 1.82150900  |
| C | -0.19393500 | -0.48166100 | 0.02175500  | C | 1.64277500  | 4.89679000  | 0.50605500  |
| C | 0.93378300  | -0.74482900 | -0.77601900 | H | 1.49655500  | 5.90690800  | 0.12853200  |
| C | -0.78247000 | -1.56246300 | 0.70173200  | I | -1.53780000 | -1.02051600 | -0.82798900 |
| C | 1.45418100  | -2.03833900 | -0.89251800 | C | 2.24490000  | -0.88259200 | -1.75666400 |
| H | 1.40930000  | 0.06749900  | -1.31981000 | C | 2.17290500  | -1.68922300 | -0.61165000 |
| C | -0.26443000 | -2.85765800 | 0.59114200  | C | 3.02320500  | -1.30195300 | -2.84790100 |
| H | -1.65219600 | -1.39181000 | 1.33091600  | C | 2.86529300  | -2.90079000 | -0.55788600 |
| C | 0.85690500  | -3.10151300 | -0.20804800 | H | 1.56421400  | -1.36838000 | 0.22875500  |
| H | 2.32713000  | -2.21452900 | -1.51788300 | C | 3.70454300  | -2.51880900 | -2.79644100 |
| H | -0.73844700 | -3.67613600 | 1.12924400  | H | 3.08976900  | -0.68643900 | -3.74089600 |
| H | 1.26023700  | -4.10739200 | -0.29617100 | C | 3.62724000  | -3.31853400 | -1.65183000 |
| I | -1.80826200 | 3.77488400  | 0.35355800  | H | 2.80247600  | -3.51883100 | 0.33361100  |
|   |             |             |             | H | 4.29705900  | -2.84137100 | -3.64839300 |
|   |             |             |             | H | 4.16025400  | -4.26482200 | -1.61396900 |
|   |             |             |             | C | 2.82720400  | 1.90142600  | -1.92388000 |
|   |             |             |             | H | 2.46800800  | 2.92885400  | -2.01405300 |
|   |             |             |             | H | 3.45830700  | 1.83463500  | -1.03348000 |
|   |             |             |             | H | 3.41217000  | 1.63694500  | -2.80995400 |
|   |             |             |             | C | -2.95066600 | 0.81062100  | 1.99636100  |
|   |             |             |             | C | -4.31644900 | 1.01067400  | 1.75986800  |
|   |             |             |             | C | -2.54009000 | -0.27427200 | 2.78799600  |
|   |             |             |             | C | -5.25943400 | 0.14033000  | 2.31480100  |
|   |             |             |             | H | -4.64904400 | 1.83976300  | 1.14302600  |
|   |             |             |             | C | -3.48318400 | -1.13481900 | 3.34827600  |
|   |             |             |             | H | -1.48089300 | -0.45454400 | 2.95614500  |
|   |             |             |             | C | -4.84662200 | -0.92997400 | 3.11073600  |
|   |             |             |             | H | -6.31695700 | 0.30210000  | 2.12302500  |
|   |             |             |             | H | -3.15507100 | -1.96990600 | 3.96148400  |
|   |             |             |             | H | -5.58165500 | -1.60475500 | 3.54132800  |
|   |             |             |             | C | -1.07891600 | 2.75963700  | 2.86319800  |
|   |             |             |             | H | -0.47654100 | 2.04690600  | 3.43454700  |

### 3-I-PMePh<sub>2</sub>

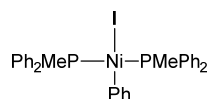

$$E = -2102.09126305$$

$$G_{\text{corr}} = 0.464839$$

|    |             |            |             |
|----|-------------|------------|-------------|
| Ni | -0.08211300 | 1.08796500 | -0.07821600 |
| P  | 1.40454700  | 0.74332100 | -1.73438000 |
| C  | 0.50619900  | 0.95557600 | -3.32110600 |
| C  | 0.04501500  | 2.24782700 | -3.62684300 |
| H  | 0.27767600  | 3.08052200 | -2.96833400 |
| C  | -0.72810000 | 2.47045300 | -4.76675600 |
| H  | -1.07753100 | 3.47454800 | -4.99252800 |
| C  | -1.05479900 | 1.40449000 | -5.61045700 |
| H  | -1.65854100 | 1.57655400 | -6.49748300 |
| C  | -0.60502200 | 0.11715900 | -5.30748700 |



|   |             |            |            |
|---|-------------|------------|------------|
| H | -0.45721800 | 3.62292700 | 2.61751200 |
| H | -1.93080700 | 3.06926300 | 3.47524500 |

### 3-I-PPh<sub>3</sub>

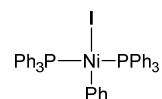

$$E = -2485.66788399$$

$$G_{\text{corr}} = 0.564945$$

|    |             |             |             |
|----|-------------|-------------|-------------|
| Ni | -1.16813600 | 0.06610900  | 0.00127000  |
| P  | 0.33072600  | -0.35533400 | -1.66331400 |
| C  | -0.18342600 | -1.11965200 | -3.26507600 |
| C  | -1.15088600 | -0.43098300 | -4.01739300 |
| H  | -1.58399100 | 0.48721600  | -3.63162500 |
| C  | -1.56026900 | -0.91475700 | -5.25804200 |
| H  | -2.30787400 | -0.36970500 | -5.82798200 |
| C  | -1.01632400 | -2.10096700 | -5.76221500 |
| H  | -1.33917600 | -2.48173800 | -6.72752700 |
| C  | -0.05459500 | -2.78936600 | -5.02213000 |
| H  | 0.37922600  | -3.70747700 | -5.40962900 |
| C  | 0.36583600  | -2.30055100 | -3.78079900 |
| H  | 1.12644300  | -2.84267500 | -3.23008000 |
| C  | 1.68749500  | -1.40972400 | -1.02902300 |
| C  | 2.96838700  | -0.92242800 | -0.74061500 |
| H  | 3.23212200  | 0.10220000  | -0.97736600 |
| C  | 3.90584900  | -1.74443300 | -0.11055400 |
| H  | 4.89354600  | -1.35246200 | 0.11663100  |
| C  | 3.57548400  | -3.05638100 | 0.23437100  |
| H  | 4.30765500  | -3.69239000 | 0.72461500  |
| C  | 2.29514000  | -3.54527800 | -0.04149100 |
| H  | 2.02589400  | -4.56150400 | 0.23363400  |
| C  | 1.35175500  | -2.72375100 | -0.65761200 |
| H  | 0.34893100  | -3.10112400 | -0.84149100 |
| P  | -2.42605900 | 0.95622900  | 1.66722300  |
| C  | -2.96952800 | -0.28390200 | 2.90345200  |
| C  | -2.74442700 | -1.64295200 | 2.63930300  |
| H  | -2.26819300 | -1.93495400 | 1.70968200  |
| C  | -3.13215100 | -2.61556300 | 3.56324600  |
| H  | -2.95211300 | -3.66493600 | 3.34639100  |
| C  | -3.74524900 | -2.23870600 | 4.76016100  |
| H  | -4.04849900 | -2.99538600 | 5.47878000  |
| C  | -3.96093300 | -0.88527500 | 5.03756000  |
| H  | -4.42855200 | -0.58685600 | 5.97189700  |
| C  | -3.56938500 | 0.08906100  | 4.11899700  |
| H  | -3.71916800 | 1.13826300  | 4.35521900  |
| C  | -1.64899100 | 2.27388100  | 2.69854600  |
| C  | -1.73667600 | 3.62429300  | 2.32978200  |
| H  | -2.34210600 | 3.92371300  | 1.48006200  |
| C  | -1.04944700 | 4.60123900  | 3.05469500  |
| H  | -1.12951400 | 5.64382500  | 2.75819100  |
| C  | -0.27075400 | 4.24213800  | 4.15644500  |
| H  | 0.26367700  | 5.00304200  | 4.71898300  |
| C  | -0.18233800 | 2.89866000  | 4.53187000  |
| H  | 0.42558300  | 2.60746700  | 5.38411200  |
| C  | -0.86349000 | 1.92082300  | 3.80836400  |
| H  | -0.76625400 | 0.88042200  | 4.09876900  |

|   |             |             |             |
|---|-------------|-------------|-------------|
| C | -3.92362000 | 1.78267300  | 0.99108700  |
| C | -3.77366500 | 2.46539400  | -0.22773900 |
| C | -5.17343900 | 1.77347700  | 1.62295700  |
| C | -4.84918800 | 3.15012100  | -0.79234400 |
| H | -2.81599700 | 2.44115300  | -0.74207200 |
| C | -6.25400600 | 2.44672600  | 1.04674400  |
| H | -5.31733400 | 1.23176000  | 2.55163800  |
| C | -6.09378200 | 3.13985900  | -0.15534200 |
| H | -4.72018700 | 3.67645100  | -1.73425000 |
| H | -7.22250500 | 2.42597400  | 1.53919600  |
| H | -6.93684500 | 3.66233200  | -0.59932800 |
| C | 1.04647700  | 1.21400000  | -2.29543500 |
| C | 2.16829200  | 1.23232500  | -3.13932300 |
| C | 0.36811000  | 2.41199400  | -2.02887200 |
| C | 2.62306400  | 2.43764400  | -3.67502300 |
| H | 2.68190000  | 0.30650300  | -3.38243300 |
| C | 0.81705500  | 3.61581600  | -2.57587000 |
| H | -0.51053400 | 2.39731100  | -1.38834000 |
| C | 1.94924800  | 3.63047800  | -3.39345600 |
| H | 3.49750600  | 2.44444500  | -4.32012300 |
| H | 0.28398500  | 4.53830900  | -2.36180900 |
| H | 2.30330300  | 4.56684000  | -3.81621700 |
| C | 0.36021900  | 0.43346100  | 1.09332000  |
| C | 0.73319500  | -0.62022500 | 1.94787200  |
| H | 0.16774800  | -1.54868900 | 1.94035700  |
| C | 1.83427000  | -0.50620100 | 2.80156400  |
| H | 2.10458200  | -1.33950900 | 3.44659100  |
| C | 1.11981200  | 1.61117000  | 1.13441000  |
| H | 0.84936100  | 2.45645700  | 0.51090900  |
| C | 2.58850700  | 0.67122600  | 2.82065800  |
| H | 3.44665500  | 0.76252600  | 3.48199000  |
| C | 2.22573100  | 1.72909100  | 1.98388000  |
| H | 2.79703400  | 2.65493300  | 1.99616900  |
| I | -3.25565200 | -1.14711300 | -1.14193200 |

### 3-Br-PMe<sub>3</sub>

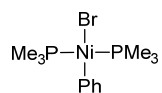

$$E = -1336.71315151$$

$$G_{\text{corr}} = 0.270212$$

|    |             |             |             |
|----|-------------|-------------|-------------|
| Ni | 2.07944600  | 0.17680000  | -0.62344700 |
| P  | 0.35120200  | 1.57309300  | -0.28472500 |
| C  | -1.11884300 | 0.73094700  | 0.43233300  |
| C  | -0.28499500 | 2.34146800  | -1.83066800 |
| C  | 0.55356800  | 3.02613500  | 0.82478300  |
| H  | -1.95671700 | 1.42892800  | 0.54074500  |
| H  | -0.85674000 | 0.32924500  | 1.41723600  |
| H  | -1.16282200 | 2.96420200  | -1.62415200 |
| H  | -0.54822900 | 1.55271000  | -2.53996400 |
| H  | 1.34103600  | 3.68097500  | 0.44121600  |
| H  | 0.84768300  | 2.69261200  | 1.82399500  |
| P  | 3.84578700  | -1.17240100 | -0.94103700 |

|    |             |             |             |
|----|-------------|-------------|-------------|
| C  | 4.32071000  | -1.37831800 | -2.70653300 |
| C  | 5.45458400  | -0.76998500 | -0.14695300 |
| C  | 3.52929900  | -2.88862900 | -0.35829900 |
| H  | 4.62482100  | -0.40769000 | -3.11310800 |
| H  | 3.45613200  | -1.73659400 | -3.27085900 |
| H  | 5.80498600  | 0.20738500  | -0.49079400 |
| H  | 6.20038500  | -1.53251900 | -0.39722700 |
| H  | 3.34465300  | -2.87380000 | 0.72141600  |
| H  | 4.38509100  | -3.54018300 | -0.56874500 |
| H  | -1.40832200 | -0.09996600 | -0.21630900 |
| H  | 0.49952900  | 2.96285500  | -2.27605400 |
| H  | -0.38549700 | 3.58691000  | 0.88956400  |
| H  | 5.15157600  | -2.08575600 | -2.80724400 |
| H  | 5.33142400  | -0.72330800 | 0.93854600  |
| H  | 2.63742500  | -3.27504200 | -0.85893600 |
| C  | 3.11041500  | 1.20800400  | 0.57785400  |
| C  | 3.13036300  | 0.90450000  | 1.95084000  |
| C  | 3.88880900  | 1.65948200  | 2.85351000  |
| C  | 4.64930700  | 2.74197000  | 2.40037300  |
| C  | 4.64267400  | 3.05876200  | 1.03839400  |
| C  | 3.88237500  | 2.29912700  | 0.14173000  |
| H  | 2.54431000  | 0.06544600  | 2.32320700  |
| H  | 3.88543400  | 1.40210200  | 3.91107000  |
| H  | 5.23915500  | 3.33032900  | 3.09899800  |
| H  | 5.23104900  | 3.89843500  | 0.67302700  |
| H  | 3.89164900  | 2.56112000  | -0.91520000 |
| Br | 0.70472600  | -1.19764500 | -2.14301000 |

### 3-Cl-PMe<sub>3</sub>

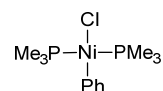

$$E = -1783.76597845$$

$$G_{\text{corr}} = 0.270514$$

|    |             |             |             |
|----|-------------|-------------|-------------|
| Ni | 0.11907600  | 0.69356100  | 0.02506100  |
| C  | 2.00844400  | 0.65361100  | -0.01394400 |
| C  | 2.72715300  | 0.37054900  | -1.18893900 |
| C  | 2.75051500  | 0.90674000  | 1.15459800  |
| C  | 4.12679400  | 0.33042200  | -1.19756300 |
| H  | 2.18664200  | 0.17396800  | -2.11328100 |
| C  | 4.14887700  | 0.87220900  | 1.15340900  |
| H  | 2.22720700  | 1.13148400  | 2.08271800  |
| C  | 4.84505900  | 0.58137200  | -0.02470000 |
| H  | 4.65628300  | 0.10573900  | -2.12164200 |
| H  | 4.69623600  | 1.07031500  | 2.07315800  |
| H  | 5.93196800  | 0.55208800  | -0.02812900 |
| P  | 0.18217600  | 2.89527700  | -0.39461500 |
| P  | 0.18101400  | -1.53705400 | 0.29706600  |
| C  | -0.46549900 | 3.86221500  | 1.02900500  |
| H  | -0.47734300 | 4.93623800  | 0.81132000  |
| H  | -1.47940000 | 3.51916900  | 1.25336300  |
| H  | 0.16586900  | 3.67923000  | 1.90513600  |
| C  | 1.78219600  | 3.71981300  | -0.76708500 |

|    |             |             |             |
|----|-------------|-------------|-------------|
| H  | 2.47367100  | 3.58424100  | 0.06913500  |
| H  | 2.23331300  | 3.26887300  | -1.65596700 |
| H  | 1.62694100  | 4.79004400  | -0.94338100 |
| C  | -0.87574100 | 3.41302800  | -1.80640100 |
| H  | -1.89675200 | 3.06545900  | -1.63091400 |
| H  | -0.86711500 | 4.50230200  | -1.92561900 |
| H  | -0.50337700 | 2.94840900  | -2.72589800 |
| C  | 1.62394300  | -2.30126100 | 1.14465600  |
| H  | 2.54576900  | -2.04227700 | 0.61825400  |
| H  | 1.69338700  | -1.92361800 | 2.16984900  |
| H  | 1.51331300  | -3.39110100 | 1.17131700  |
| C  | 0.19754500  | -2.34026000 | -1.35903900 |
| H  | 0.19609500  | -3.43256700 | -1.27018100 |
| H  | -0.68529700 | -2.02049800 | -1.92203800 |
| H  | 1.09286400  | -2.02432900 | -1.90333100 |
| C  | -1.24283300 | -2.33409100 | 1.14452200  |
| H  | -2.16881000 | -2.05824600 | 0.63505600  |
| H  | -1.12880400 | -3.42401100 | 1.14777700  |
| H  | -1.30037500 | -1.97320400 | 2.17670600  |
| Cl | -2.17902600 | 0.77818700  | 0.10558400  |

#### 4-I-PMe<sub>3</sub>

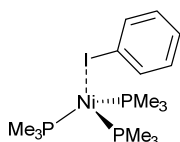

|                   |             |                |             |
|-------------------|-------------|----------------|-------------|
| E                 | =           | -1796.05427209 |             |
| G <sub>corr</sub> | =           | 0.373122       |             |
| Ni                | -2.68722900 | 0.81089200     | -0.14483600 |
| P                 | -3.66742600 | 2.35298400     | -1.33936100 |
| C                 | -4.12724100 | 3.96460900     | -0.53499200 |
| C                 | -5.27247300 | 1.96983200     | -2.19612200 |
| C                 | -2.68564800 | 2.99467000     | -2.77863100 |
| H                 | -4.59588600 | 4.66484600     | -1.23905400 |
| H                 | -3.22643400 | 4.43177500     | -0.12107500 |
| H                 | -5.63388500 | 2.80809800     | -2.80629500 |
| H                 | -6.03329400 | 1.72259800     | -1.44666700 |
| H                 | -2.49795800 | 2.17853500     | -3.48385000 |
| H                 | -1.71667800 | 3.36283000     | -2.42427900 |
| P                 | -1.16623200 | 1.73310900     | 1.13600600  |
| P                 | -2.16836800 | -0.96629500    | -1.31013500 |
| C                 | -0.15786000 | 3.08249200     | 0.34966300  |
| C                 | 0.21609300  | 0.75998900     | 1.91728000  |
| C                 | -1.77927200 | 2.62888000     | 2.64378100  |
| C                 | -2.08702200 | -0.78017200    | -3.15849700 |
| C                 | -0.52550600 | -1.79587300    | -1.03129300 |
| C                 | -3.28329900 | -2.44705400    | -1.19171800 |
| H                 | 0.56071800  | 3.52279600     | 1.05330600  |
| H                 | -0.82054900 | 3.87287800     | -0.01911800 |
| H                 | 0.90206800  | 1.40457900     | 2.48294300  |
| H                 | 0.78301900  | 0.23440000     | 1.14048900  |
| H                 | -2.26883000 | 1.91306100     | 3.31371800  |
| H                 | -2.52689100 | 3.37087000     | 2.34221100  |

|   |             |             |             |
|---|-------------|-------------|-------------|
| H | -1.33754000 | -0.02307900 | -3.41440900 |
| H | -3.05842500 | -0.43812200 | -3.53216600 |
| H | 0.27656600  | -1.06442700 | -1.18173000 |
| H | -0.36514000 | -2.64298000 | -1.71165300 |
| H | -3.31824700 | -2.79186400 | -0.15241400 |
| H | -2.94596400 | -3.27342000 | -1.83071700 |
| H | -4.81923500 | 3.77538200  | 0.29348600  |
| H | -5.13810600 | 1.09232100  | -2.83907800 |
| H | -3.20690300 | 3.80573300  | -3.30358300 |
| H | -1.82479400 | -1.72166200 | -3.65894800 |
| H | -0.46399900 | -2.15854600 | 0.00041500  |
| H | -4.29954000 | -2.16130000 | -1.48505500 |
| H | -0.97077700 | 3.13259200  | 3.18940300  |
| H | 0.39084100  | 2.67317000  | -0.50596000 |
| H | -0.20104600 | 0.01164600  | 2.59919800  |
| I | -4.60759000 | 0.05979400  | 1.50943800  |
| C | -3.74504700 | -1.46738800 | 2.74648800  |
| C | -2.43050900 | -1.84774600 | 2.48064100  |
| C | -4.47725900 | -2.05610400 | 3.77933100  |
| C | -1.83481600 | -2.83877200 | 3.26661500  |
| H | -1.88769500 | -1.36727400 | 1.67052800  |
| C | -3.86942000 | -3.04600100 | 4.55892400  |
| H | -5.50138600 | -1.75347900 | 3.97802900  |
| C | -2.55145300 | -3.43845900 | 4.30574800  |
| H | -0.80943300 | -3.13812100 | 3.06324900  |
| H | -4.43136300 | -3.50910000 | 5.36603500  |
| H | -2.08648300 | -4.20792900 | 4.91599800  |

#### 4-I-PMe<sub>2</sub>Ph

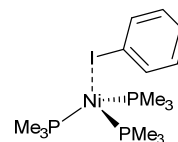

|                   |             |                |             |
|-------------------|-------------|----------------|-------------|
| E                 | =           | -2371.44101625 |             |
| G <sub>corr</sub> | =           | 0.520621       |             |
| Ni                | -0.28787400 | 0.20661100     | 0.10664600  |
| P                 | 0.18039100  | -0.32849400    | -1.95012300 |
| P                 | -1.74657500 | -1.18795100    | 0.91742300  |
| P                 | 1.46724900  | 0.60923200     | 1.33973400  |
| C                 | 1.61298000  | 0.59628900     | -2.66746200 |
| C                 | 1.47843700  | 1.98279500     | -2.86850200 |
| H                 | 0.52004800  | 2.46489900     | -2.68310900 |
| C                 | 2.55999000  | 2.75773000     | -3.28437200 |
| H                 | 2.43089800  | 3.82639400     | -3.43845200 |
| C                 | 3.81111000  | 2.16521800     | -3.49236800 |
| H                 | 4.65804800  | 2.76987800     | -3.80596100 |
| C                 | 3.96111900  | 0.79188200     | -3.29249900 |
| H                 | 4.92758500  | 0.31986400     | -3.45297300 |
| C                 | 2.87073800  | 0.01314200     | -2.88869100 |
| H                 | 3.01475900  | -1.05299800    | -2.73942200 |
| C                 | -1.10912300 | -0.07017100    | -3.26413700 |
| H                 | -1.99249400 | -0.66237800    | -3.00145200 |
| H                 | -0.75710400 | -0.36467000    | -4.26014900 |

|   |             |             |             |
|---|-------------|-------------|-------------|
| H | -1.40721100 | 0.98290500  | -3.28583900 |
| C | 0.61424100  | -2.09892900 | -2.29105100 |
| H | -0.28291200 | -2.69809000 | -2.10241900 |
| H | 1.39836600  | -2.43854600 | -1.60728400 |
| H | 0.93577700  | -2.26519300 | -3.32624100 |
| C | -3.00827200 | -1.69701000 | -0.33282300 |
| C | -2.96309900 | -2.92414800 | -1.01450400 |
| H | -2.23113400 | -3.67770800 | -0.73846900 |
| C | -3.85221600 | -3.19710200 | -2.05973100 |
| H | -3.79710700 | -4.15286700 | -2.57558700 |
| C | -4.80864300 | -2.25238100 | -2.43683000 |
| H | -5.49953800 | -2.46517300 | -3.24840900 |
| C | -4.87090700 | -1.02923800 | -1.75853000 |
| H | -5.61410300 | -0.28721200 | -2.04068700 |
| C | -3.97706600 | -0.75346100 | -0.72453700 |
| H | -4.02516700 | 0.20937200  | -0.22172100 |
| C | -2.84710400 | -0.80550700 | 2.36607400  |
| H | -3.49937000 | 0.03885200  | 2.13020300  |
| H | -2.21855800 | -0.51622200 | 3.21427500  |
| H | -3.46533500 | -1.66717100 | 2.64662300  |
| C | -1.04631200 | -2.80893700 | 1.48643900  |
| H | -0.47370300 | -2.61701800 | 2.40044200  |
| H | -0.35382300 | -3.20563600 | 0.73755800  |
| H | -1.81890700 | -3.55575300 | 1.70644800  |
| C | 1.12589300  | 1.41583100  | 2.96775900  |
| C | 0.48538900  | 0.67063700  | 3.97603200  |
| H | 0.28811500  | -0.38751700 | 3.82115100  |
| C | 0.08073100  | 1.27022600  | 5.16821100  |
| H | -0.40898700 | 0.67290000  | 5.93354000  |
| C | 0.29374900  | 2.63825800  | 5.37586700  |
| H | -0.02987300 | 3.10943100  | 6.30019900  |
| C | 0.92366400  | 3.39189500  | 4.38345300  |
| H | 1.09363300  | 4.45545500  | 4.53249800  |
| C | 1.33880400  | 2.78651000  | 3.19214400  |
| H | 1.82243900  | 3.39574100  | 2.43437900  |
| C | 2.48281000  | -0.85742600 | 1.85992600  |
| H | 1.86678700  | -1.55922500 | 2.43073300  |
| H | 3.35425300  | -0.57241100 | 2.46171700  |
| H | 2.82229200  | -1.37101700 | 0.95331500  |
| C | 2.81483700  | 1.67729600  | 0.64188200  |
| H | 2.40139500  | 2.62710900  | 0.28881400  |
| H | 3.22727500  | 1.15696900  | -0.22871100 |
| H | 3.62138500  | 1.87582800  | 1.35837600  |
| I | -1.44110400 | 2.56136600  | -0.15989300 |
| C | -2.88546900 | 2.68983000  | 1.40893200  |
| C | -2.44280900 | 2.66714800  | 2.73407600  |
| C | -4.24858100 | 2.71056600  | 1.10017200  |
| C | -3.38648500 | 2.66309400  | 3.76427800  |
| H | -1.38431600 | 2.63012300  | 2.96203500  |
| C | -5.18139700 | 2.69849300  | 2.14307900  |
| H | -4.58209300 | 2.72224300  | 0.06702800  |
| C | -4.75368400 | 2.67389600  | 3.47322300  |
| H | -3.04317000 | 2.64091500  | 4.79518300  |
| H | -6.24290800 | 2.70607800  | 1.90916900  |
| H | -5.48305000 | 2.66175100  | 4.27856200  |

#### 4-I-PMePh<sub>2</sub>

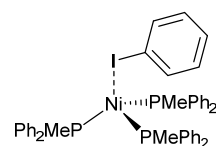

|                   |             |                |             |
|-------------------|-------------|----------------|-------------|
| E                 | =           | -2946.83103576 |             |
| G <sub>corr</sub> | =           | 0.672649       |             |
| Ni                | -1.22910900 | 0.81013200     | -0.04172700 |
| P                 | -0.98543800 | 0.74676200     | -2.20350100 |
| C                 | -2.46391900 | 0.01537400     | -3.04233100 |
| C                 | -3.61960600 | 0.79480500     | -3.22201200 |
| H                 | -3.60552300 | 1.85136600     | -2.97239200 |
| C                 | -4.79905600 | 0.22532700     | -3.70660800 |
| H                 | -5.68150400 | 0.84645100     | -3.84011900 |
| C                 | -4.84660400 | -1.13715700    | -4.01751500 |
| H                 | -5.76548600 | -1.58200400    | -4.39025100 |
| C                 | -3.70187900 | -1.92070100    | -3.84828100 |
| H                 | -3.72587800 | -2.98049800    | -4.09003300 |
| C                 | -2.52141000 | -1.35023300    | -3.36710700 |
| H                 | -1.64344600 | -1.97464500    | -3.23504500 |
| C                 | 0.39138000  | -0.25575400    | -2.94565300 |
| C                 | 1.18449900  | -1.03439800    | -2.09175000 |
| H                 | 0.96426900  | -1.04090500    | -1.02982800 |
| C                 | 2.23077300  | -1.81398100    | -2.59398500 |
| H                 | 2.82480800  | -2.41859800    | -1.91409100 |
| C                 | 2.49685100  | -1.82319900    | -3.96430600 |
| H                 | 3.30987700  | -2.42678100    | -4.35989700 |
| C                 | 1.70702000  | -1.05770200    | -4.82960000 |
| H                 | 1.90518800  | -1.06707300    | -5.89864100 |
| C                 | 0.66061500  | -0.28426800    | -4.32503700 |
| H                 | 0.04632500  | 0.28864500     | -5.01445200 |
| C                 | -0.78944600 | 2.33820500     | -3.15305800 |
| H                 | -0.82484600 | 2.20361600     | -4.23914700 |
| H                 | 0.17414600  | 2.78176200     | -2.87966800 |
| H                 | -1.57822800 | 3.03544700     | -2.85646400 |
| P                 | -2.59696000 | 2.30255300     | 0.77589800  |
| C                 | -3.09004900 | 1.98731700     | 2.53046200  |
| C                 | -2.24945500 | 2.37455000     | 3.58974200  |
| H                 | -1.37184100 | 2.98029000     | 3.39117400  |
| C                 | -2.52910400 | 1.99133200     | 4.90165500  |
| H                 | -1.86381200 | 2.30540100     | 5.70186800  |
| C                 | -3.65046100 | 1.20396800     | 5.18342600  |
| H                 | -3.86481800 | 0.89995500     | 6.20478600  |
| C                 | -4.49255700 | 0.81211900     | 4.14008000  |
| H                 | -5.36581900 | 0.19719000     | 4.34320100  |
| C                 | -4.21670500 | 1.20110800     | 2.82645600  |
| H                 | -4.87655200 | 0.86660500     | 2.03243800  |
| C                 | -2.05284300 | 4.07554500     | 0.82333500  |
| C                 | -2.61771100 | 5.04128200     | 1.67162800  |
| H                 | -3.39580200 | 4.75717300     | 2.37494000  |
| C                 | -2.17460300 | 6.36504900     | 1.63519000  |
| H                 | -2.61238700 | 7.09952400     | 2.30677000  |

|   |             |             |             |
|---|-------------|-------------|-------------|
| C | -1.17321600 | 6.74740400  | 0.73623700  |
| H | -0.83063500 | 7.77862600  | 0.70852200  |
| C | -0.61460200 | 5.79768200  | -0.12315900 |
| H | 0.16733100  | 6.08516500  | -0.82180700 |
| C | -1.04623500 | 4.46932000  | -0.07001900 |
| H | -0.58746200 | 3.71734300  | -0.70439200 |
| C | -4.26025600 | 2.53190400  | -0.03134400 |
| H | -4.91882100 | 3.16858300  | 0.57025600  |
| H | -4.74084100 | 1.56432200  | -0.19812600 |
| H | -4.10098100 | 3.00756100  | -1.00373700 |
| P | -1.59155900 | -1.08339300 | 1.02844700  |
| C | -0.74825800 | -2.61659900 | 0.42818400  |
| C | 0.52126900  | -2.97649600 | 0.91420600  |
| H | 0.96757100  | -2.42630100 | 1.73814600  |
| C | 1.23219800  | -4.03503800 | 0.34129500  |
| H | 2.21227200  | -4.29783500 | 0.73239300  |
| C | 0.68893100  | -4.75432000 | -0.72624800 |
| H | 1.24368200  | -5.57492000 | -1.17338100 |
| C | -0.57602200 | -4.40998200 | -1.21250200 |
| H | -1.01228900 | -4.96539300 | -2.03936400 |
| C | -1.28515600 | -3.35212500 | -0.64263700 |
| H | -2.26299300 | -3.09261400 | -1.03765600 |
| C | -3.36699800 | -1.60737000 | 1.03797600  |
| C | -4.17455300 | -1.19359900 | -0.03314300 |
| H | -3.73459800 | -0.60023200 | -0.82723100 |
| C | -5.53278600 | -1.51760000 | -0.07462600 |
| H | -6.13660600 | -1.19138300 | -0.91749800 |
| C | -6.10821200 | -2.24791300 | 0.96849900  |
| H | -7.16748900 | -2.49134000 | 0.94720000  |
| C | -5.31408000 | -2.66464000 | 2.04152500  |
| H | -5.75564300 | -3.23295600 | 2.85655900  |
| C | -3.95232300 | -2.35382600 | 2.07271000  |
| H | -3.35499700 | -2.68736000 | 2.91593200  |
| C | -1.16001000 | -1.11230300 | 2.83297500  |
| H | -1.18345200 | -2.11477000 | 3.27272900  |
| H | -1.85851100 | -0.46227000 | 3.36640300  |
| H | -0.15758300 | -0.69365200 | 2.95449400  |
| I | 1.25347100  | 1.44898500  | 0.79240700  |
| C | 1.25550300  | 2.52196600  | 2.64009800  |
| C | 1.32151900  | 1.81616300  | 3.84508600  |
| C | 1.10414600  | 3.91211600  | 2.62940300  |
| C | 1.21945500  | 2.51433100  | 5.05198400  |
| H | 1.43824000  | 0.73751400  | 3.84889000  |
| C | 0.99805600  | 4.59680100  | 3.84374000  |
| H | 1.04129600  | 4.45465800  | 1.69375700  |
| C | 1.04986400  | 3.90167100  | 5.05486900  |
| H | 1.26484100  | 1.96641100  | 5.98954200  |
| H | 0.86355400  | 5.67516400  | 3.83365400  |
| H | 0.95955600  | 4.43733200  | 5.99579600  |

#### 4-I-PPh<sub>3</sub>

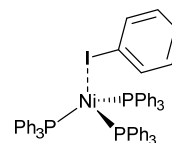

|                   |             |                |             |
|-------------------|-------------|----------------|-------------|
| E                 | =           | -3522.21388166 |             |
| G <sub>corr</sub> | =           | 0.823783       |             |
| Ni                | 0.02935700  | 0.56132300     | -0.37060700 |
| P                 | 0.50429900  | 0.70327600     | -2.53514000 |
| C                 | -0.53935200 | -0.20767600    | -3.77843700 |
| C                 | -1.93168500 | -0.21016300    | -3.59155400 |
| H                 | -2.35782600 | 0.29819200     | -2.73554300 |
| C                 | -2.77614300 | -0.85984800    | -4.49292800 |
| H                 | -3.85000400 | -0.84005600    | -4.32754200 |
| C                 | -2.24089600 | -1.53054800    | -5.59620900 |
| H                 | -2.89526700 | -2.04383500    | -6.29610500 |
| C                 | -0.85786500 | -1.53513800    | -5.79396200 |
| H                 | -0.43120100 | -2.04987000    | -6.65135800 |
| C                 | -0.01361900 | -0.87353100    | -4.89733500 |
| H                 | 1.05651100  | -0.87856300    | -5.07651700 |
| C                 | 2.19871000  | 0.20660400     | -3.10240100 |
| C                 | 2.65172900  | -1.06901700    | -2.72932400 |
| H                 | 1.99749500  | -1.72251900    | -2.16197600 |
| C                 | 3.93652100  | -1.49710600    | -3.06047200 |
| H                 | 4.27089400  | -2.48271400    | -2.74884600 |
| C                 | 4.79657100  | -0.64802500    | -3.76471600 |
| H                 | 5.80447100  | -0.97259100    | -4.01024900 |
| C                 | 4.35432400  | 0.61974700     | -4.14918200 |
| H                 | 5.01490900  | 1.28376200     | -4.70130400 |
| C                 | 3.06068400  | 1.04288900     | -3.82782800 |
| H                 | 2.73146200  | 2.03160800     | -4.13216400 |
| P                 | -1.58635600 | 1.99558400     | 0.19124100  |
| C                 | -2.59999600 | 1.62418800     | 1.71017600  |
| C                 | -3.69269300 | 2.40950900     | 2.11564600  |
| H                 | -3.97404400 | 3.28858800     | 1.54402500  |
| C                 | -4.43324500 | 2.06332500     | 3.24586600  |
| H                 | -5.27595100 | 2.68017500     | 3.54845200  |
| C                 | -4.09804900 | 0.92223900     | 3.98562800  |
| H                 | -4.68060100 | 0.65250500     | 4.86304100  |
| C                 | -3.01475400 | 0.13577700     | 3.59201700  |
| H                 | -2.73922500 | -0.75188300    | 4.15511600  |
| C                 | -2.27240800 | 0.49230700     | 2.46240900  |
| H                 | -1.42163200 | -0.10353900    | 2.16075700  |
| C                 | -1.13005700 | 3.77149600     | 0.49944100  |
| C                 | -2.00247700 | 4.85813100     | 0.32263100  |
| H                 | -3.00952400 | 4.69557300     | -0.04786300 |
| C                 | -1.57943400 | 6.16159400     | 0.59264800  |
| H                 | -2.26649200 | 6.99064100     | 0.44225700  |
| C                 | -0.28037500 | 6.40248900     | 1.05032500  |
| H                 | 0.04630100  | 7.41875200     | 1.25544500  |
| C                 | 0.59524700  | 5.32959900     | 1.23452200  |
| H                 | 1.61273400  | 5.49790900     | 1.57800600  |
| C                 | 0.17002900  | 4.02918700     | 0.95706700  |

|   |             |             |             |
|---|-------------|-------------|-------------|
| H | 0.86339800  | 3.20528900  | 1.06900300  |
| P | 1.77700200  | 0.31179100  | 0.95767400  |
| C | 1.51056500  | 0.15083100  | 2.79403800  |
| C | 0.66707200  | 1.08383800  | 3.41996000  |
| H | 0.21352600  | 1.87433100  | 2.83176200  |
| C | 0.38975800  | 1.00257100  | 4.78449200  |
| H | -0.27007900 | 1.73480700  | 5.24231800  |
| C | 0.93698100  | -0.03054900 | 5.55046300  |
| H | 0.70968900  | -0.10565900 | 6.61066000  |
| C | 1.77751600  | -0.96580200 | 4.94222400  |
| H | 2.21428100  | -1.77040900 | 5.52875600  |
| C | 2.07033600  | -0.87089200 | 3.57812800  |
| H | 2.73128900  | -1.60449100 | 3.12865100  |
| C | 2.96404500  | 1.74367800  | 0.88744700  |
| C | 3.32148700  | 2.53237900  | 1.99175800  |
| H | 2.94763300  | 2.29327900  | 2.98144800  |
| C | 4.15602100  | 3.64428300  | 1.83305500  |
| H | 4.41446700  | 4.24591800  | 2.70104700  |
| C | 4.65989800  | 3.97714200  | 0.57406500  |
| H | 5.30661900  | 4.84230700  | 0.45371000  |
| C | 4.32910700  | 3.18367900  | -0.52885400 |
| H | 4.71806500  | 3.42206500  | -1.51566200 |
| C | 3.48736500  | 2.08380100  | -0.37194400 |
| H | 3.23976100  | 1.48044300  | -1.23634000 |
| C | 2.93420700  | -1.11610100 | 0.66893100  |
| C | 2.37878400  | -2.36632400 | 0.35380400  |
| C | 4.32959100  | -1.01293700 | 0.77656000  |
| C | 3.19076000  | -3.48361300 | 0.15265100  |
| H | 1.30404700  | -2.46202600 | 0.24452000  |
| C | 5.14582200  | -2.12630700 | 0.55982600  |
| H | 4.78801000  | -0.06181700 | 1.02798700  |
| C | 4.58034800  | -3.36561200 | 0.24971500  |
| H | 2.73781200  | -4.44137800 | -0.09116500 |
| H | 6.22528300  | -2.02383900 | 0.63825500  |
| H | 5.21629300  | -4.23119800 | 0.08307000  |
| C | -2.94579300 | 2.14193800  | -1.05880600 |
| C | -2.82373300 | 2.99324800  | -2.17149200 |
| C | -4.03860100 | 1.25676600  | -1.01330400 |
| C | -3.76586200 | 2.96410000  | -3.20067300 |
| H | -1.98823700 | 3.68112500  | -2.24038000 |
| C | -4.97914500 | 1.22679100  | -2.04587600 |
| H | -4.15336700 | 0.58022700  | -0.17200600 |
| C | -4.84676400 | 2.08006700  | -3.14488100 |
| H | -3.64721900 | 3.63122300  | -4.05057300 |
| H | -5.81545500 | 0.53428600  | -1.98929700 |
| H | -5.57729300 | 2.05528600  | -3.94920900 |
| C | 0.38895900  | 2.44260700  | -3.16102900 |
| C | 0.82892200  | 3.46096200  | -2.30126500 |
| C | -0.15086000 | 2.79597500  | -4.40635700 |
| C | 0.71984100  | 4.80297500  | -2.66546900 |
| H | 1.23260100  | 3.19608000  | -1.33119800 |
| C | -0.26819200 | 4.14054300  | -4.77021000 |
| H | -0.49706300 | 2.02653900  | -5.08940600 |
| C | 0.16115700  | 5.14699300  | -3.90041100 |
| H | 1.04968300  | 5.57485500  | -1.97511400 |

|   |             |             |             |
|---|-------------|-------------|-------------|
| H | -0.70102400 | 4.40075300  | -5.73305300 |
| H | 0.05879400  | 6.19190700  | -4.18197000 |
| I | -1.45173800 | -1.75913200 | -0.47396100 |
| C | -1.80793800 | -2.74648800 | 1.38587500  |
| C | -3.02818200 | -3.39465700 | 1.59685800  |
| C | -0.84161700 | -2.68650400 | 2.39243300  |
| C | -3.27630500 | -3.99091900 | 2.83716800  |
| H | -3.77974900 | -3.42873500 | 0.81380700  |
| C | -1.10528900 | -3.28054100 | 3.62979500  |
| H | 0.09408800  | -2.16544500 | 2.23222700  |
| C | -2.32021100 | -3.93330800 | 3.85510900  |
| H | -4.22449500 | -4.49503900 | 3.00539900  |
| H | -0.35713000 | -3.21825600 | 4.41555000  |
| H | -2.52264000 | -4.39247800 | 4.81886600  |

#### 4-Br-PMe<sub>3</sub>

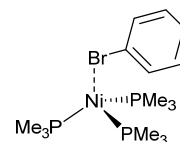

$$E = -1797.83621232$$

$$G_{\text{corr}} = 0.373538$$

|    |             |             |             |
|----|-------------|-------------|-------------|
| Ni | 2.61103600  | 7.78219200  | 11.76114000 |
| P  | 1.48320500  | 9.29356400  | 10.67376100 |
| C  | 1.04476600  | 10.88616800 | 11.53358300 |
| C  | -0.17310000 | 8.90367600  | 9.92072400  |
| C  | 2.35001800  | 9.98124900  | 9.18057700  |
| H  | 0.53744900  | 11.59665800 | 10.86742900 |
| H  | 1.95751700  | 11.35489500 | 11.91808400 |
| H  | -0.59229100 | 9.75315700  | 9.36510200  |
| H  | -0.87690800 | 8.61839000  | 10.71145800 |
| H  | 2.52272700  | 9.17751700  | 8.45700800  |
| H  | 3.32577300  | 10.37950200 | 9.48024300  |
| P  | 4.07279100  | 8.75247700  | 13.05470700 |
| P  | 3.14001000  | 6.01293600  | 10.61320100 |
| C  | 5.03007700  | 10.13205700 | 12.25640800 |
| C  | 5.49159000  | 7.84249800  | 13.85119400 |
| C  | 3.41930000  | 9.63857100  | 14.55162000 |
| C  | 3.22336100  | 6.18681700  | 8.76240800  |
| C  | 4.78883800  | 5.19064500  | 10.89178700 |
| C  | 2.03526500  | 4.52359700  | 10.73607800 |
| H  | 5.73103400  | 10.60910000 | 12.95390200 |
| H  | 4.33601000  | 10.88988100 | 11.87719500 |
| H  | 6.16212800  | 8.51879300  | 14.39820600 |
| H  | 6.06852900  | 7.31664700  | 13.08201000 |
| H  | 2.94351500  | 8.91342300  | 15.22134700 |
| H  | 2.65300800  | 10.35484500 | 14.23632200 |
| H  | 3.94726900  | 6.96783700  | 8.50407600  |
| H  | 2.24290900  | 6.49184000  | 8.38055300  |
| H  | 5.58779700  | 5.92142100  | 10.72188300 |
| H  | 4.94673300  | 4.33248700  | 10.22454000 |
| H  | 2.00854200  | 4.17335600  | 11.77368500 |
| H  | 2.37444500  | 3.70160900  | 10.09218000 |

|    |             |             |             |
|----|-------------|-------------|-------------|
| H  | 0.39063600  | 10.67328000 | 12.38705700 |
| H  | -0.07021500 | 8.05016400  | 9.24130100  |
| H  | 1.76915800  | 10.77816700 | 8.69836200  |
| H  | 3.52067800  | 5.25109200  | 8.27049300  |
| H  | 4.86066600  | 4.84527900  | 11.92885700 |
| H  | 1.01547500  | 4.80380500  | 10.45015900 |
| H  | 4.20618100  | 10.16954000 | 15.10315200 |
| H  | 5.59316500  | 9.73434600  | 11.40472600 |
| H  | 5.10300000  | 7.09690700  | 14.55306600 |
| Br | 0.78679500  | 6.93691200  | 13.42165500 |
| C  | 1.54549600  | 5.54112800  | 14.54133900 |
| C  | 2.88301100  | 5.21043900  | 14.34091400 |
| C  | 0.76483800  | 4.90026100  | 15.50304200 |
| C  | 3.45709900  | 4.20897300  | 15.12831300 |
| H  | 3.44872100  | 5.73774400  | 13.57797200 |
| C  | 1.35345300  | 3.89972500  | 16.28322600 |
| H  | -0.27741900 | 5.16971800  | 15.64471900 |
| C  | 2.69538000  | 3.55277200  | 16.09917700 |
| H  | 4.50105000  | 3.94497200  | 14.97879400 |
| H  | 0.75658000  | 3.39264500  | 17.03666600 |
| H  | 3.14419900  | 2.77438900  | 16.70997000 |

#### 4-Cl-PMe<sub>3</sub>

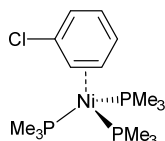

$$E = -2244.8916434$$

$$G_{\text{corr}} = 0.374356$$

|    |             |             |             |
|----|-------------|-------------|-------------|
| Ni | 2.96763800  | 1.19341500  | -0.21067500 |
| P  | 1.42451200  | 2.48576500  | -1.01080600 |
| C  | 0.61658500  | 3.83252300  | -0.01261100 |
| C  | -0.08931100 | 1.74478400  | -1.79610600 |
| C  | 2.06728700  | 3.50082600  | -2.42905000 |
| H  | -0.06989300 | 4.44155200  | -0.61589300 |
| H  | 1.39024500  | 4.48423300  | 0.40926700  |
| H  | -0.75313000 | 2.50747900  | -2.22445900 |
| H  | -0.64922800 | 1.17437300  | -1.04681500 |
| H  | 2.48475700  | 2.83889600  | -3.19503800 |
| H  | 2.87412600  | 4.14927200  | -2.07020400 |
| P  | 4.17358500  | 1.96282900  | 1.41499500  |
| P  | 3.38857800  | -0.52025200 | -1.46374200 |
| C  | 5.06139000  | 3.55136100  | 1.03556400  |
| C  | 5.57838200  | 0.99280200  | 2.15839500  |
| C  | 3.28210000  | 2.43981400  | 2.97221000  |
| C  | 3.67382100  | -0.12280300 | -3.25687100 |
| C  | 4.82943300  | -1.66474500 | -1.17488700 |
| C  | 2.03958200  | -1.78884300 | -1.63713600 |
| H  | 5.66345000  | 3.90083400  | 1.88423000  |
| H  | 4.32835100  | 4.32330900  | 0.77664500  |
| H  | 6.07691900  | 1.52891100  | 2.97689800  |
| H  | 6.31561000  | 0.76872800  | 1.37865900  |

|    |             |             |             |
|----|-------------|-------------|-------------|
| H  | 2.86132300  | 1.54411300  | 3.43911100  |
| H  | 2.45402400  | 3.11187300  | 2.72367200  |
| H  | 4.50796300  | 0.58145600  | -3.35034000 |
| H  | 2.77796200  | 0.35372100  | -3.66926400 |
| H  | 5.76047800  | -1.08677100 | -1.20425100 |
| H  | 4.88281100  | -2.46816500 | -1.92134800 |
| H  | 1.84976700  | -2.26542900 | -0.66925100 |
| H  | 2.30257100  | -2.56801300 | -2.36409100 |
| H  | 0.05845900  | 3.38731200  | 0.81762700  |
| H  | 0.21670600  | 1.05495000  | -2.59061700 |
| H  | 1.28270200  | 4.12317700  | -2.87819900 |
| H  | 3.89982600  | -1.02128200 | -3.84548600 |
| H  | 4.74629200  | -2.11182400 | -0.17735200 |
| H  | 1.11713900  | -1.29443500 | -1.96033000 |
| H  | 3.94746900  | 2.93379800  | 3.69217000  |
| H  | 5.71772900  | 3.40626400  | 0.17018100  |
| H  | 5.19280700  | 0.04063300  | 2.54049000  |
| C  | 0.27772800  | 0.11414900  | 2.65444300  |
| C  | 1.12778100  | -0.45978700 | 1.71067700  |
| C  | 0.49229800  | -0.02861200 | 4.02533200  |
| C  | 2.22525300  | -1.20031700 | 2.16197600  |
| H  | 0.94328500  | -0.33277500 | 0.64952100  |
| C  | 1.59497800  | -0.77038200 | 4.45747900  |
| H  | -0.18581200 | 0.42879700  | 4.73825800  |
| C  | 2.46123300  | -1.35690500 | 3.52964800  |
| H  | 2.89605900  | -1.64127200 | 1.43265600  |
| H  | 1.77273300  | -0.88744000 | 5.52293500  |
| H  | 3.31695800  | -1.93198300 | 3.87178500  |
| Cl | -1.12298600 | 1.03953700  | 2.09739300  |

#### TS-4-5-I-PMe<sub>3</sub>

$$E(\text{OSS}) = -1796.04522643$$

$$E(\text{T}) = -1796.02982302$$

$$S^2(\text{OSS}) = 0.5095$$

$$G_{\text{corr}} = 0.371742$$

$$v = -270.05 \text{ cm}^{-1}$$

|    |             |             |             |
|----|-------------|-------------|-------------|
| Ni | -2.77813800 | 0.80421700  | -0.02224200 |
| P  | -3.57721000 | 2.39008800  | -1.38115000 |
| C  | -3.99742900 | 4.01400400  | -0.60033400 |
| C  | -5.15366100 | 2.00546100  | -2.26987200 |
| C  | -2.50314000 | 2.94822300  | -2.78148200 |
| H  | -4.43538900 | 4.71222600  | -1.32468500 |
| H  | -3.09097100 | 4.46403300  | -0.18160900 |
| H  | -5.45994800 | 2.82258900  | -2.93510800 |
| H  | -5.94413500 | 1.82251000  | -1.53430800 |
| H  | -2.33323500 | 2.11347300  | -3.46787900 |
| H  | -1.53204900 | 3.27180900  | -2.39245000 |
| P  | -1.23823500 | 1.85676400  | 1.23939000  |
| P  | -2.29799600 | -1.00269400 | -1.27498800 |
| C  | -0.08894000 | 3.00078500  | 0.34243500  |
| C  | -0.01836000 | 0.89022300  | 2.24729000  |

|   |             |             |             |   |             |             |             |
|---|-------------|-------------|-------------|---|-------------|-------------|-------------|
| C | -1.91564400 | 2.98860800  | 2.53835100  | C | 4.07651300  | 1.80578500  | -3.35211200 |
| C | -2.27862900 | -0.79961800 | -3.11662200 | H | 5.01953100  | 2.28344800  | -3.60462800 |
| C | -0.66522600 | -1.85110300 | -1.03576200 | C | 4.00723200  | 0.41876600  | -3.20805900 |
| C | -3.45658000 | -2.43370100 | -1.09571500 | H | 4.89699700  | -0.18917600 | -3.35284500 |
| H | 0.62494300  | 3.47568900  | 1.02696100  | C | 2.79376100  | -0.19783300 | -2.88301000 |
| H | -0.66179500 | 3.78404000  | -0.16544300 | H | 2.76314800  | -1.27867200 | -2.78019400 |
| H | 0.69312600  | 1.54968000  | 2.76036000  | C | -1.13608100 | 0.37873000  | -3.42406300 |
| H | 0.53632100  | 0.20553300  | 1.59624300  | H | -2.10967800 | -0.08174100 | -3.22527700 |
| H | -2.52675700 | 2.40545000  | 3.23548600  | H | -0.78970600 | 0.08226300  | -4.42096500 |
| H | -2.56546400 | 3.73232300  | 2.06560700  | H | -1.26287600 | 1.46488700  | -3.39174200 |
| H | -1.48434700 | -0.10029100 | -3.39835900 | C | 0.19298300  | -1.95197600 | -2.46805600 |
| H | -3.23581800 | -0.38839200 | -3.45414900 | H | -0.78881200 | -2.40778800 | -2.30127800 |
| H | 0.14566800  | -1.13011300 | -1.18887300 | H | 0.90570600  | -2.42060200 | -1.78232000 |
| H | -0.53339600 | -2.68860600 | -1.73293600 | H | 0.50180200  | -2.14282000 | -3.50221400 |
| H | -3.46471100 | -2.76340900 | -0.05171200 | C | -2.93155400 | -1.72693300 | -0.32548100 |
| H | -3.17153000 | -3.27582400 | -1.73866400 | C | -3.12564100 | -3.06345900 | -0.70374700 |
| H | -4.70685500 | 3.84997200  | 0.21723700  | H | -2.53585600 | -3.85551200 | -0.25205700 |
| H | -5.02475500 | 1.09176400  | -2.86038000 | C | -4.07750100 | -3.39532300 | -1.67461500 |
| H | -2.96088400 | 3.77677700  | -3.33580200 | H | -4.21161800 | -4.43527800 | -1.96198200 |
| H | -2.10501400 | -1.75569100 | -3.62601200 | C | -4.85374200 | -2.39915500 | -2.26950400 |
| H | -0.59466600 | -2.23262800 | -0.01216500 | H | -5.59344500 | -2.65934900 | -3.02206200 |
| H | -4.47091900 | -2.11143600 | -1.35410500 | C | -4.67139700 | -1.06290300 | -1.89469000 |
| H | -1.12299400 | 3.50235500  | 3.09668800  | H | -5.26834200 | -0.28005400 | -2.35578800 |
| H | 0.46634000  | 2.43755200  | -0.41580700 | C | -3.71058900 | -0.72958800 | -0.94064600 |
| H | -0.55110400 | 0.29366600  | 2.99452000  | H | -3.54314200 | 0.31287100  | -0.67970400 |
| I | -4.66198400 | 0.10816400  | 1.61614300  | C | -2.70025400 | -0.68253200 | 2.32275600  |
| C | -3.62568100 | -1.68183400 | 2.85939700  | H | -3.39975500 | 0.10166800  | 2.02409600  |
| C | -2.31065100 | -1.92961300 | 2.50047200  | H | -2.05839300 | -0.28326300 | 3.11300700  |
| C | -4.27305700 | -2.41823600 | 3.84406600  | H | -3.26388100 | -1.54298700 | 2.70225700  |
| C | -1.60563700 | -2.95235600 | 3.14808300  | C | -0.87203400 | -2.71058300 | 1.48975300  |
| H | -1.84267400 | -1.32410300 | 1.72179800  | H | -0.22346500 | -2.44385400 | 2.33086900  |
| C | -3.56458500 | -3.44244100 | 4.49029300  | H | -0.25010500 | -3.16342000 | 0.71107900  |
| H | -5.30708100 | -2.21152000 | 4.11400400  | H | -1.61026100 | -3.44072400 | 1.84058600  |
| C | -2.23529900 | -3.70814600 | 4.14309300  | C | 1.11372000  | 1.44228000  | 2.94453100  |
| H | -0.57091400 | -3.15713700 | 2.87905200  | C | 0.53631600  | 0.61846200  | 3.92818900  |
| H | -4.05209700 | -4.03127400 | 5.26479300  | H | 0.40522500  | -0.44337600 | 3.73634900  |
| H | -1.69165900 | -4.50262000 | 4.64814100  | C | 0.11582800  | 1.14466200  | 5.14967100  |

#### TS-4-5-I-PMe<sub>2</sub>Ph

$$E(\text{OSS}) = -2371.43028050$$

$$E(\text{T}) = -2371.41605770$$

$$S^2(\text{OSS}) = 0.5479$$

$$G_{\text{corr}} = 0.519749$$

$$v = -276.90 \text{ cm}^{-1}$$

|    |             |             |             |
|----|-------------|-------------|-------------|
| Ni | -0.34083600 | 0.44923300  | 0.01234500  |
| P  | 0.04180000  | -0.14834500 | -2.09720300 |
| P  | -1.65254700 | -1.15548400 | 0.87201600  |
| P  | 1.49086700  | 0.73557400  | 1.28600800  |
| C  | 1.63446600  | 0.56804900  | -2.68673000 |
| C  | 1.71899800  | 1.96512500  | -2.82581100 |
| H  | 0.83959500  | 2.57708400  | -2.63917300 |
| C  | 2.92418800  | 2.57764300  | -3.16521600 |
| H  | 2.96855600  | 3.65870500  | -3.27125600 |

|   |             |             |             |
|---|-------------|-------------|-------------|
| C | 4.07651300  | 1.80578500  | -3.35211200 |
| H | 5.01953100  | 2.28344800  | -3.60462800 |
| C | 4.00723200  | 0.41876600  | -3.20805900 |
| H | 4.89699700  | -0.18917600 | -3.35284500 |
| C | 2.79376100  | -0.19783300 | -2.88301000 |
| H | 2.76314800  | -1.27867200 | -2.78019400 |
| C | -1.13608100 | 0.37873000  | -3.42406300 |
| H | -2.10967800 | -0.08174100 | -3.22527700 |
| H | -0.78970600 | 0.08226300  | -4.42096500 |
| H | -1.26287600 | 1.46488700  | -3.39174200 |
| C | 0.19298300  | -1.95197600 | -2.46805600 |
| H | -0.78881200 | -2.40778800 | -2.30127800 |
| H | 0.90570600  | -2.42060200 | -1.78232000 |
| H | 0.50180200  | -2.14282000 | -3.50221400 |
| C | -2.93155400 | -1.72693300 | -0.32548100 |
| C | -3.12564100 | -3.06345900 | -0.70374700 |
| H | -2.53585600 | -3.85551200 | -0.25205700 |
| C | -4.07750100 | -3.39532300 | -1.67461500 |
| H | -4.21161800 | -4.43527800 | -1.96198200 |
| C | -4.85374200 | -2.39915500 | -2.26950400 |
| H | -5.59344500 | -2.65934900 | -3.02206200 |
| C | -4.67139700 | -1.06290300 | -1.89469000 |
| H | -5.26834200 | -0.28005400 | -2.35578800 |
| C | -3.71058900 | -0.72958800 | -0.94064600 |
| H | -3.54314200 | 0.31287100  | -0.67970400 |
| C | -2.70025400 | -0.68253200 | 2.32275600  |
| H | -3.39975500 | 0.10166800  | 2.02409600  |
| H | -2.05839300 | -0.28326300 | 3.11300700  |
| H | -3.26388100 | -1.54298700 | 2.70225700  |
| C | -0.87203400 | -2.71058300 | 1.48975300  |
| H | -0.22346500 | -2.44385400 | 2.33086900  |
| H | -0.25010500 | -3.16342000 | 0.71107900  |
| H | -1.61026100 | -3.44072400 | 1.84058600  |
| C | 1.11372000  | 1.44228000  | 2.94453100  |
| C | 0.53631600  | 0.61846200  | 3.92818900  |
| H | 0.40522500  | -0.44337600 | 3.73634900  |
| C | 0.11582800  | 1.14466200  | 5.14967100  |
| H | -0.32522300 | 0.48829200  | 5.89577000  |
| C | 0.25727100  | 2.51138300  | 5.41235600  |
| H | -0.07455400 | 2.92376700  | 6.36148800  |
| C | 0.82641000  | 3.34120800  | 4.44380000  |
| H | 0.94099900  | 4.40488700  | 4.63696800  |
| C | 1.25049800  | 2.81289800  | 3.22032500  |
| H | 1.68555700  | 3.47993300  | 2.48255200  |
| C | 2.50053500  | -0.76197700 | 1.70263900  |
| H | 1.88374500  | -1.51390100 | 2.20244000  |
| H | 3.35860300  | -0.51858300 | 2.33993300  |
| H | 2.86142000  | -1.19586000 | 0.76296700  |
| C | 2.81951200  | 1.84452200  | 0.63293900  |
| H | 2.39899400  | 2.81219400  | 0.34492300  |
| H | 3.22601500  | 1.37704100  | -0.26962700 |
| H | 3.62897800  | 1.99818000  | 1.35641100  |
| I | -1.41107600 | 2.77213000  | -0.03817500 |
| C | -3.14736900 | 2.83441200  | 1.65270000  |
| C | -2.73549400 | 2.83192300  | 2.98302400  |



|   |             |            |            |   |             |            |            |
|---|-------------|------------|------------|---|-------------|------------|------------|
| C | -4.47000300 | 2.58088400 | 1.29879100 | H | -5.38415500 | 0.17874700 | 4.36796000 |
| C | -3.67916900 | 2.57981000 | 3.98680900 | C | -4.25479800 | 1.13757100 | 2.80788100 |
| H | -1.69349800 | 3.00022500 | 3.24416500 | H | -4.95185500 | 0.82572200 | 2.03685600 |
| C | -5.40920000 | 2.32666900 | 2.30906200 | C | -2.09985600 | 3.98965800 | 0.77852800 |
| H | -4.77373500 | 2.56384700 | 0.25395200 | C | -2.72667300 | 4.96273000 | 1.57352100 |
| C | -5.01291900 | 2.32344900 | 3.65047000 | H | -3.55357600 | 4.68485200 | 2.22156000 |
| H | -3.36740300 | 2.57338800 | 5.02938900 | C | -2.28185000 | 6.28538300 | 1.55264100 |
| H | -6.44596700 | 2.12573300 | 2.04633000 | H | -2.76711900 | 7.02814000 | 2.18068800 |
| H | -5.74104200 | 2.11813200 | 4.43117300 | C | -1.21577900 | 6.65540100 | 0.72538800 |

### TS-4-5-I-PMPh<sub>2</sub>

$$E(\text{OSS}) = -2946.81831720$$

$$E(\text{T}) = -2946.80534049$$

$$S^2(\text{OSS}) = 0.5464$$

$$G_{\text{corr}} = 0.670258$$

$$v = -273.91 \text{ cm}^{-1}$$

|    |             |             |             |   |             |             |             |
|----|-------------|-------------|-------------|---|-------------|-------------|-------------|
| Ni | -1.08585700 | 0.77954500  | -0.00087100 | P | -1.55764100 | -1.15549600 | 1.09171900  |
| P  | -0.89894500 | 0.78396000  | -2.22754300 | C | -0.70577800 | -2.65071600 | 0.43225700  |
| C  | -2.43407500 | 0.14098400  | -3.02770700 | C | 0.57095100  | -3.00738400 | 0.89911800  |
| C  | -3.53982500 | 0.98642500  | -3.21420900 | H | 1.02328200  | -2.46501900 | 1.72464200  |
| H  | -3.45687800 | 2.04703700  | -2.99927300 | C | 1.27912000  | -4.05282300 | 0.30073200  |
| C  | -4.75937800 | 0.47823700  | -3.66745400 | H | 2.26491500  | -4.31687800 | 0.67556600  |
| H  | -5.60297700 | 1.14969800  | -3.80619300 | C | 0.72699500  | -4.75528700 | -0.77374800 |
| C  | -4.89487400 | -0.88585800 | -3.94075100 | H | 1.28120000  | -5.56490700 | -1.24096400 |
| H  | -5.84457600 | -1.28213400 | -4.29003300 | C | -0.54308900 | -4.40877500 | -1.24305800 |
| C  | -3.79847700 | -1.73504700 | -3.76570600 | H | -0.98377400 | -4.95023000 | -2.07653300 |
| H  | -3.89127800 | -2.79687300 | -3.97921000 | C | -1.25248000 | -3.36565400 | -0.64643700 |
| C  | -2.57902400 | -1.22717600 | -3.31416300 | H | -2.23593300 | -3.10396000 | -1.02536000 |
| H  | -1.73932400 | -1.90094300 | -3.17644900 | C | -3.33459400 | -1.64616500 | 1.06729500  |
| C  | 0.40267400  | -0.29059800 | -2.97945700 | C | -4.11956000 | -1.20700300 | -0.01002400 |
| C  | 1.20097500  | -1.08318600 | -2.14430900 | H | -3.66062700 | -0.61475600 | -0.79432500 |
| H  | 1.04585900  | -1.04417700 | -1.07155400 | C | -5.48230300 | -1.50852900 | -0.07148100 |
| C  | 2.17970300  | -1.92406800 | -2.68236000 | H | -6.07039900 | -1.16386500 | -0.91781800 |
| H  | 2.78199500  | -2.53818800 | -2.01901700 | C | -6.08132900 | -2.24070700 | 0.95675700  |
| C  | 2.36918800  | -1.98016700 | -4.06411900 | H | -7.14391000 | -2.46665300 | 0.91975300  |
| H  | 3.12973400  | -2.63264000 | -4.48548200 | C | -5.30806400 | -2.68306600 | 2.03501400  |
| C  | 1.57186100  | -1.19868600 | -4.90807100 | H | -5.76913700 | -3.25350300 | 2.83740500  |
| H  | 1.71150600  | -1.24369100 | -5.98525100 | C | -3.94254600 | -2.39482200 | 2.08716900  |
| C  | 0.59264900  | -0.36314700 | -4.37036900 | H | -3.35921000 | -2.74596400 | 2.93303600  |
| H  | -0.03313400 | 0.22202600  | -5.03910800 | C | -1.12660600 | -1.19721700 | 2.88892000  |
| C  | -0.62840100 | 2.38742000  | -3.11998100 | H | -1.12375800 | -2.20798000 | 3.30885500  |
| H  | -0.67104700 | 2.27944600  | -4.20838800 | H | -1.84582000 | -0.57654500 | 3.42959900  |
| H  | 0.35653100  | 2.77114000  | -2.83443300 | H | -0.13714400 | -0.74818100 | 3.01481300  |
| H  | -1.38128500 | 3.11459700  | -2.80242500 | I | 1.24983500  | 1.32001300  | 0.98080100  |
| P  | -2.67353700 | 2.23587300  | 0.72406700  | C | 1.34745100  | 2.74765900  | 2.96125300  |
| C  | -3.11322700 | 1.88510200  | 2.47752300  | C | 1.34790700  | 2.13156500  | 4.21011500  |
| C  | -2.21973400 | 2.24641600  | 3.50106100  | C | 1.11494500  | 4.11433700  | 2.82747100  |
| H  | -1.32534500 | 2.81299500  | 3.26524500  | C | 1.12129100  | 2.90714900  | 5.35552100  |
| C  | -2.47052200 | 1.87956200  | 4.82320400  | H | 1.50390100  | 1.05837800  | 4.30013000  |
| H  | -1.76781200 | 2.17209100  | 5.59838500  | C | 0.87746600  | 4.88298400  | 3.97525900  |
| C  | -3.60967100 | 1.13367300  | 5.14391600  | H | 1.09039900  | 4.58077500  | 1.84725700  |
| H  | -3.80105500 | 0.84261000  | 6.17352300  | C | 0.87918400  | 4.28010800  | 5.23733800  |
| C  | -4.49879500 | 0.76362400  | 4.13225400  | H | 1.12352900  | 2.43644100  | 6.33667900  |

|   |            |            |            |
|---|------------|------------|------------|
| H | 0.68245100 | 5.94900000 | 3.87800100 |
| H | 0.68797000 | 4.87649300 | 6.12584200 |

**TS-4-5-I-PPh<sub>3</sub>**

E (OSS) = -3522.19654393

E (T) = -3522.18625046

S<sup>2</sup>(OSS) = 0.5756

G<sub>corr</sub> = 0.820685

v = -295.63 cm<sup>-1</sup>

|    |             |             |             |
|----|-------------|-------------|-------------|
| Ni | -0.29723200 | 0.75225900  | 0.25707900  |
| P  | 0.00769200  | 0.44789300  | -2.00073400 |
| C  | -1.30551500 | -0.54709000 | -2.83998100 |
| C  | -2.61550100 | -0.48756900 | -2.34282700 |
| H  | -2.82791500 | 0.10892000  | -1.46568600 |
| C  | -3.64135500 | -1.21066400 | -2.95462400 |
| H  | -4.65025000 | -1.14914800 | -2.55636500 |
| C  | -3.36631900 | -2.01790400 | -4.06175700 |
| H  | -4.16195900 | -2.59031700 | -4.53148400 |
| C  | -2.06142400 | -2.09271200 | -4.55830800 |
| H  | -1.83831600 | -2.72258900 | -5.41565400 |
| C  | -1.03750900 | -1.36056000 | -3.95321200 |
| H  | -0.02759500 | -1.42999800 | -4.34550700 |
| C  | 1.51585600  | -0.52096200 | -2.43602800 |
| C  | 1.66212200  | -1.78269800 | -1.83365400 |
| H  | 0.90823800  | -2.14300000 | -1.14163300 |
| C  | 2.76875800  | -2.57858100 | -2.12145400 |
| H  | 2.86202600  | -3.55153700 | -1.64872200 |
| C  | 3.76164800  | -2.11387300 | -2.99031300 |
| H  | 4.63217900  | -2.72908600 | -3.20259000 |
| C  | 3.63292100  | -0.85440800 | -3.57894900 |
| H  | 4.40034900  | -0.48610700 | -4.25525200 |
| C  | 2.51017800  | -0.06361800 | -3.31203000 |
| H  | 2.41232200  | 0.90672300  | -3.78999800 |
| P  | -1.73877800 | 2.51313600  | 0.53492500  |
| C  | -2.50765700 | 2.73414300  | 2.21553600  |
| C  | -2.46926600 | 3.95790900  | 2.90341300  |
| H  | -2.02370600 | 4.83258900  | 2.44314500  |
| C  | -2.99722000 | 4.06877600  | 4.19275700  |
| H  | -2.94865500 | 5.02404300  | 4.70921900  |
| C  | -3.58390200 | 2.96483300  | 4.81407200  |
| H  | -3.99301300 | 3.05311000  | 5.81706300  |
| C  | -3.63698100 | 1.74365600  | 4.13608400  |
| H  | -4.08923400 | 0.87427500  | 4.60615800  |
| C  | -3.09540000 | 1.62906800  | 2.85501500  |
| H  | -3.11706300 | 0.66596500  | 2.35660000  |
| C  | -1.02002700 | 4.19480300  | 0.25846700  |
| C  | -1.73256000 | 5.27971100  | -0.27573500 |
| H  | -2.76687100 | 5.15939300  | -0.58041300 |
| C  | -1.11718800 | 6.52506900  | -0.42321900 |
| H  | -1.67809500 | 7.35335000  | -0.84835200 |
| C  | 0.20937200  | 6.70862500  | -0.02297100 |
| H  | 0.68587100  | 7.67827600  | -0.14176300 |
| C  | 0.91794500  | 5.64088500  | 0.53444800  |

|   |             |             |             |
|---|-------------|-------------|-------------|
| H | 1.94919500  | 5.76665800  | 0.85072400  |
| C | 0.30420600  | 4.39508900  | 0.67037400  |
| H | 0.86132100  | 3.56396900  | 1.08393000  |
| P | 1.75103800  | 0.68483600  | 1.35838500  |
| C | 1.61365500  | 0.78262400  | 3.19907800  |
| C | 0.37508900  | 1.12772000  | 3.75336200  |
| H | -0.46646800 | 1.29858700  | 3.09289600  |
| C | 0.21499600  | 1.22826200  | 5.13807800  |
| H | -0.75555800 | 1.49719900  | 5.54670900  |
| C | 1.29778000  | 0.97602100  | 5.98290300  |
| H | 1.17798200  | 1.04878400  | 7.06081800  |
| C | 2.53805700  | 0.62086700  | 5.43959800  |
| H | 3.38139600  | 0.41759400  | 6.09464900  |
| C | 2.69615900  | 0.52220400  | 4.05669600  |
| H | 3.66125600  | 0.24218300  | 3.64297700  |
| C | 2.91165100  | 2.06243400  | 0.93807700  |
| C | 3.36979400  | 3.00796800  | 1.86849100  |
| H | 3.08684900  | 2.93046200  | 2.91312400  |
| C | 4.18774200  | 4.06659000  | 1.46126700  |
| H | 4.53060300  | 4.79050500  | 2.19615000  |
| C | 4.56478000  | 4.19441000  | 0.12244700  |
| H | 5.19946000  | 5.01895400  | -0.19122500 |
| C | 4.11805200  | 3.25483300  | -0.81126900 |
| H | 4.40113800  | 3.34234400  | -1.85704200 |
| C | 3.29601700  | 2.20318600  | -0.40731600 |
| H | 2.95802000  | 1.47999800  | -1.14211400 |
| C | 2.84899600  | -0.80566000 | 1.20134000  |
| C | 2.31009400  | -2.04423100 | 1.59061600  |
| C | 4.17196300  | -0.76550700 | 0.73834700  |
| C | 3.07189000  | -3.20914000 | 1.51392300  |
| H | 1.28916600  | -2.09604200 | 1.95372400  |
| C | 4.93260400  | -1.93561600 | 0.65651500  |
| H | 4.62176700  | 0.17425200  | 0.43810300  |
| C | 4.38756500  | -3.16049700 | 1.04374400  |
| H | 2.63414000  | -4.15651200 | 1.81473000  |
| H | 5.95478100  | -1.88353900 | 0.29019900  |
| H | 4.97987900  | -4.06951900 | 0.97892300  |
| C | -3.19677500 | 2.50097900  | -0.60872800 |
| C | -3.00309100 | 2.86850100  | -1.95342600 |
| C | -4.44983100 | 1.99891100  | -0.22634700 |
| C | -4.03171500 | 2.73820100  | -2.88522200 |
| H | -2.04459400 | 3.25598900  | -2.27829800 |
| C | -5.47750300 | 1.86119500  | -1.16464900 |
| H | -4.63709000 | 1.71122800  | 0.80252600  |
| C | -5.27346700 | 2.22807900  | -2.49628600 |
| H | -3.85501800 | 3.02654500  | -3.91809300 |
| H | -6.44043700 | 1.46923600  | -0.84735600 |
| H | -6.07308800 | 2.11749500  | -3.22381000 |
| C | 0.13849600  | 1.95937800  | -3.04818200 |
| C | 0.71209700  | 3.09304600  | -2.45364000 |
| C | -0.34777900 | 2.05352100  | -4.36150100 |
| C | 0.80138000  | 4.29888200  | -3.14982400 |
| H | 1.06324800  | 3.03572800  | -1.43142400 |
| C | -0.26756600 | 3.26290700  | -5.05618300 |
| H | -0.80550700 | 1.19290500  | -4.83900400 |

|   |             |             |             |
|---|-------------|-------------|-------------|
| C | 0.30476600  | 4.38746800  | -4.45295500 |
| H | 1.23643400  | 5.16741900  | -2.66310100 |
| H | -0.65690300 | 3.32729500  | -6.06907200 |
| H | 0.35656700  | 5.32846100  | -4.99445700 |
| I | -1.49822600 | -1.37237200 | 1.16386300  |
| C | -1.01442700 | -3.53541600 | 0.12960900  |
| C | -1.39873600 | -3.75953700 | -1.18988800 |
| C | -0.17601200 | -4.41960000 | 0.80285900  |
| C | -0.92536600 | -4.89990000 | -1.85241900 |
| H | -2.04456900 | -3.05897400 | -1.70845700 |
| C | 0.29115200  | -5.56035400 | 0.13497200  |
| H | 0.12338200  | -4.22859800 | 1.83060500  |
| C | -0.07818000 | -5.79632800 | -1.19324700 |
| H | -1.21529600 | -5.07891200 | -2.88569200 |
| H | 0.94715900  | -6.25861200 | 0.65098000  |
| H | 0.29374400  | -6.67605700 | -1.71236800 |

#### TS-4-5-Br-PMe<sub>3</sub>

$$E(\text{OSS}) = -1797.8223389$$

$$E(\text{T}) = -1797.8047425$$

$$S^2(\text{OSS}) = 0.5443$$

$$G_{\text{corr}} = 0.372202$$

$$v = -285.62 \text{ cm}^{-1}$$

|    |             |             |             |
|----|-------------|-------------|-------------|
| Ni | 0.99546000  | -0.07223400 | 0.07217300  |
| P  | 0.12096300  | 1.50120700  | -1.24164800 |
| C  | -0.36548300 | 3.08635000  | -0.41914600 |
| C  | -1.44055900 | 1.07806300  | -2.14034600 |
| C  | 1.16432600  | 2.13654800  | -2.63311300 |
| H  | -0.82714400 | 3.78808800  | -1.12516400 |
| H  | 0.51919300  | 3.55982400  | 0.02003500  |
| H  | -1.78383000 | 1.90318900  | -2.77723400 |
| H  | -2.22111300 | 0.83728100  | -1.41113400 |
| H  | 1.35894200  | 1.32549200  | -3.34215000 |
| H  | 2.12659700  | 2.48331800  | -2.24182400 |
| P  | 2.51779900  | 0.98121600  | 1.35517700  |
| P  | 1.61970200  | -1.83514700 | -1.16992200 |
| C  | 3.50039800  | 2.33052700  | 0.54655600  |
| C  | 3.89444600  | 0.03185600  | 2.16081800  |
| C  | 1.82978200  | 1.87549900  | 2.82187100  |
| C  | 1.66641800  | -1.63559500 | -3.01245000 |
| C  | 3.31093400  | -2.54471500 | -0.88508300 |
| C  | 0.57668500  | -3.35639600 | -1.01513000 |
| H  | 4.19289000  | 2.80747800  | 1.25161500  |
| H  | 2.82650400  | 3.09393300  | 0.14424400  |
| H  | 4.56635100  | 0.69299200  | 2.72341800  |
| H  | 4.47408600  | -0.49736400 | 1.39627100  |
| H  | 1.32960900  | 1.15272900  | 3.47513300  |
| H  | 1.07779000  | 2.59592900  | 2.48250600  |
| H  | 2.39584400  | -0.86278100 | -3.27782900 |
| H  | 0.68163900  | -1.31768400 | -3.37143900 |
| H  | 4.06172200  | -1.76360900 | -1.04969800 |
| H  | 3.52163700  | -3.38749900 | -1.55618400 |
| H  | 0.54864300  | -3.67050100 | 0.03306100  |

|    |             |             |             |
|----|-------------|-------------|-------------|
| H  | 0.95826500  | -4.18057000 | -1.63092700 |
| H  | -1.07310300 | 2.87134200  | 0.38822600  |
| H  | -1.27410600 | 0.19161100  | -2.76265700 |
| H  | 0.67575200  | 2.96250200  | -3.16477800 |
| H  | 1.94320400  | -2.57037100 | -3.51642000 |
| H  | 3.39716200  | -2.88907400 | 0.15066500  |
| H  | -0.44838800 | -3.12182700 | -1.32116300 |
| H  | 2.60606200  | 2.40149100  | 3.39159900  |
| H  | 4.07712000  | 1.91167200  | -0.28564100 |
| H  | 3.47691800  | -0.71042100 | 2.84824700  |
| Br | -0.81011600 | -0.80367700 | 1.55217200  |
| C  | 0.08242600  | -2.41655400 | 2.90350700  |
| C  | 1.40610800  | -2.68568300 | 2.61234000  |
| C  | -0.61198000 | -3.07278000 | 3.90868300  |
| C  | 2.08141000  | -3.65962200 | 3.35939800  |
| H  | 1.90069700  | -2.13413400 | 1.80923600  |
| C  | 0.06764700  | -4.04789800 | 4.65586600  |
| H  | -1.65516500 | -2.84472100 | 4.12039700  |
| C  | 1.40860300  | -4.33975800 | 4.38138500  |
| H  | 3.12451900  | -3.88705500 | 3.14619100  |
| H  | -0.45156500 | -4.57822200 | 5.45194900  |
| H  | 1.92809400  | -5.09660700 | 4.96373300  |

#### TS-4-5-Cl-PMe<sub>3</sub>

$$E(\text{OSS}) = -2244.86583598$$

$$E(\text{T}) = -2244.84805196$$

$$S^2(\text{OSS}) = 0.5347$$

$$G_{\text{corr}} = 0.371917$$

$$v = -165.37 \text{ cm}^{-1}$$

|    |             |             |             |
|----|-------------|-------------|-------------|
| Ni | 2.29970700  | 1.34803400  | 0.02861300  |
| P  | 1.34468700  | 2.88316800  | -1.26710600 |
| C  | 0.84037600  | 4.46645100  | -0.45066700 |
| C  | -0.22682300 | 2.42246400  | -2.13208900 |
| C  | 2.34618200  | 3.52981500  | -2.68364000 |
| H  | 0.35124800  | 5.15219600  | -1.15382700 |
| H  | 1.72470900  | 4.96057200  | -0.03375000 |
| H  | -0.59616800 | 3.23475700  | -2.77082600 |
| H  | -0.99092900 | 2.17717200  | -1.38673800 |
| H  | 2.54725400  | 2.71816500  | -3.38984700 |
| H  | 3.30706900  | 3.90304200  | -2.31363700 |
| P  | 3.83065200  | 2.41819200  | 1.28125100  |
| P  | 2.92298000  | -0.40494300 | -1.22331800 |
| C  | 4.77074500  | 3.77788500  | 0.44173200  |
| C  | 5.23677700  | 1.48829100  | 2.05976300  |
| C  | 3.17122100  | 3.30849900  | 2.76573200  |
| C  | 2.99173600  | -0.18998600 | -3.06369800 |
| C  | 4.59360900  | -1.16107000 | -0.93329200 |
| C  | 1.84342000  | -1.90442800 | -1.09353100 |
| H  | 5.46985500  | 4.27552000  | 1.12546700  |
| H  | 4.07101600  | 4.52276500  | 0.04847000  |
| H  | 5.91880300  | 2.15836600  | 2.59902300  |
| H  | 5.80057500  | 0.95405700  | 1.28696400  |
| H  | 2.68065000  | 2.58427000  | 3.42521700  |

|    |             |             |             |
|----|-------------|-------------|-------------|
| H  | 2.41640200  | 4.03447000  | 2.44444700  |
| H  | 3.73626000  | 0.57294600  | -3.31582200 |
| H  | 2.01643300  | 0.14653900  | -3.43125800 |
| H  | 5.36644900  | -0.39899200 | -1.08428400 |
| H  | 4.78798000  | -2.00238800 | -1.61114200 |
| H  | 1.80844300  | -2.23611100 | -0.05066600 |
| H  | 2.20508400  | -2.72785600 | -1.72208100 |
| H  | 0.15352600  | 4.24596000  | 0.37325600  |
| H  | -0.05731300 | 1.53207300  | -2.74789800 |
| H  | 1.82761300  | 4.33918800  | -3.21224600 |
| H  | 3.25863100  | -1.12502500 | -3.57233800 |
| H  | 4.66306500  | -1.51868600 | 0.09934400  |
| H  | 0.82396100  | -1.64130100 | -1.39611900 |
| H  | 3.95837500  | 3.82913600  | 3.32538800  |
| H  | 5.33548900  | 3.36299400  | -0.40055700 |
| H  | 4.84072600  | 0.75050000  | 2.76497300  |
| C  | 1.34825100  | -0.93052300 | 2.76971700  |
| C  | 2.67623400  | -1.21251400 | 2.53262400  |
| C  | 0.58388500  | -1.58523100 | 3.71963300  |
| C  | 3.29384600  | -2.21466200 | 3.29191600  |
| H  | 3.21361000  | -0.65300100 | 1.76225400  |
| C  | 1.20799400  | -2.58950500 | 4.47732100  |
| H  | -0.46353700 | -1.33788900 | 3.88025800  |
| C  | 2.55569100  | -2.90133700 | 4.26349700  |
| H  | 4.34166500  | -2.45919400 | 3.12703300  |
| H  | 0.63961800  | -3.12686500 | 5.23401400  |
| H  | 3.03027300  | -3.68048400 | 4.85448100  |
| Cl | 0.60732300  | 0.62395700  | 1.48038700  |

### 5-I-PMe<sub>3</sub>

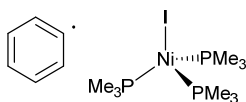

$$E(\text{OSS}) = -1796.05732288$$

$$E(\text{T}) = -1796.05665155$$

$$S^2(\text{OSS}) = 1.0067$$

$$G_{\text{corr}} = 0.366149$$

|    |             |             |             |
|----|-------------|-------------|-------------|
| Ni | -0.62583000 | 0.66902000  | 0.02368500  |
| P  | -1.21459500 | 2.27719400  | -1.52055600 |
| C  | -1.59541400 | 3.90919700  | -0.75042900 |
| C  | -2.77287800 | 1.91895600  | -2.43877600 |
| C  | -0.05852400 | 2.75157000  | -2.88104000 |
| H  | -1.97593900 | 4.62646200  | -1.48736700 |
| H  | -0.69109300 | 4.31914200  | -0.28898500 |
| H  | -3.05842200 | 2.75133400  | -3.09273100 |
| H  | -3.57373000 | 1.73183400  | -1.71626900 |
| H  | 0.12216000  | 1.88801300  | -3.52897800 |
| H  | 0.90012900  | 3.06789400  | -2.45640200 |
| P  | 0.92071400  | 1.77038500  | 1.30936900  |
| P  | -0.26235200 | -1.26585900 | -1.16032400 |
| C  | 2.12032600  | 2.82469800  | 0.37654700  |
| C  | 2.06860700  | 0.74664000  | 2.33593400  |

|   |             |             |             |
|---|-------------|-------------|-------------|
| C | 0.26492700  | 2.95787400  | 2.56069700  |
| C | -0.16078800 | -1.11491800 | -2.99818900 |
| C | 1.30647700  | -2.17209800 | -0.78691700 |
| C | -1.52133500 | -2.59788800 | -0.95439900 |
| H | 2.85500800  | 3.28431000  | 1.04878900  |
| H | 1.58525200  | 3.61957000  | -0.15311000 |
| H | 2.81516600  | 1.37188400  | 2.84023000  |
| H | 2.58287300  | 0.02253400  | 1.69481000  |
| H | -0.36872100 | 2.41590900  | 3.27036800  |
| H | -0.35733100 | 3.70565100  | 2.05863600  |
| H | 0.65928700  | -0.44046000 | -3.26536700 |
| H | -1.09532300 | -0.69701800 | -3.38561700 |
| H | 2.16302400  | -1.51127900 | -0.96005400 |
| H | 1.41230300  | -3.06662600 | -1.41297600 |
| H | -1.60216400 | -2.85326500 | 0.10709600  |
| H | -1.26058900 | -3.49684900 | -1.52601400 |
| H | -2.34527600 | 3.76313300  | 0.03365500  |
| H | -2.64378500 | 1.01588800  | -3.04443300 |
| H | -0.46855800 | 3.56929700  | -3.48536100 |
| H | 0.01268700  | -2.09024600 | -3.46882800 |
| H | 1.30932100  | -2.47695500 | 0.26381400  |
| H | -2.49641600 | -2.22573200 | -1.28606900 |
| H | 1.07238800  | 3.46179400  | 3.10567800  |
| H | 2.64622400  | 2.21133000  | -0.36302000 |
| H | 1.49876700  | 0.19883500  | 3.09219700  |
| I | -2.96508700 | 0.44484800  | 1.44693400  |
| C | -1.47822700 | -2.52553600 | 3.01822400  |
| C | -0.23174800 | -2.08815200 | 2.62358400  |
| C | -1.72649500 | -3.63587100 | 3.79857000  |
| C | 0.87411600  | -2.83807600 | 3.05980500  |
| H | -0.10690000 | -1.20774200 | 1.99961100  |
| C | -0.60705200 | -4.37576700 | 4.22059300  |
| H | -2.73196900 | -3.93678500 | 4.08205200  |
| C | 0.68184100  | -3.97531400 | 3.85215200  |
| H | 1.87862600  | -2.52927800 | 2.77919000  |
| H | -0.74930700 | -5.26110300 | 4.83629900  |
| H | 1.54082800  | -4.55158800 | 4.18574000  |

### 5-I-PMe<sub>2</sub>Ph

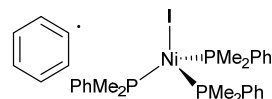

$$E(\text{OSS}) = -2371.44147589$$

$$E(\text{T}) = -2371.44128873$$

$$S^2(\text{OSS}) = 1.0117$$

$$G_{\text{corr}} = 0.516916$$

|    |             |             |             |
|----|-------------|-------------|-------------|
| Ni | -0.47346700 | 0.63783000  | -0.19883400 |
| P  | 0.06944800  | -0.28957200 | -2.22969100 |
| P  | -1.77334800 | -1.00075600 | 0.75351400  |
| P  | 1.27933300  | 1.02946800  | 1.22852300  |
| C  | 1.72350300  | 0.37709700  | -2.67487600 |
| C  | 1.82564600  | 1.73960900  | -3.01012100 |

|   |             |             |             |
|---|-------------|-------------|-------------|
| H | 0.93005200  | 2.35218100  | -3.06378600 |
| C | 3.07097700  | 2.32152000  | -3.24730600 |
| H | 3.13070500  | 3.37519000  | -3.50746700 |
| C | 4.23769300  | 1.55763100  | -3.13818400 |
| H | 5.20809300  | 2.01367500  | -3.31551800 |
| C | 4.14785300  | 0.20593500  | -2.79814800 |
| H | 5.04911400  | -0.39598300 | -2.71299700 |
| C | 2.89988100  | -0.38244800 | -2.57006600 |
| H | 2.85365000  | -1.43611700 | -2.31149000 |
| C | -0.94539100 | 0.06111500  | -3.73245500 |
| H | -1.91550900 | -0.43272800 | -3.61589000 |
| H | -0.45945200 | -0.29782600 | -4.64640100 |
| H | -1.12152700 | 1.13809800  | -3.80884900 |
| C | 0.25863000  | -2.12250800 | -2.32155000 |
| H | -0.73520000 | -2.56498100 | -2.19506700 |
| H | 0.89639600  | -2.47955500 | -1.50738600 |
| H | 0.67544200  | -2.45050900 | -3.28037800 |
| C | -3.01961200 | -1.60297100 | -0.45885600 |
| C | -3.39308700 | -2.94689600 | -0.60966400 |
| H | -2.95377100 | -3.71600300 | 0.01893300  |
| C | -4.33358400 | -3.31424100 | -1.57711600 |
| H | -4.61004800 | -4.35964500 | -1.68904100 |
| C | -4.91799600 | -2.34396300 | -2.39488000 |
| H | -5.64967200 | -2.63258200 | -3.14491300 |
| C | -4.55403400 | -1.00137000 | -2.24921500 |
| H | -4.99837400 | -0.24157800 | -2.88686300 |
| C | -3.60306800 | -0.63526300 | -1.29566500 |
| H | -3.28803500 | 0.40257300  | -1.20859800 |
| C | -2.81318200 | -0.52293600 | 2.20035500  |
| H | -3.47238600 | 0.29658100  | 1.90639500  |
| H | -2.16652000 | -0.16877200 | 3.00791400  |
| H | -3.41636800 | -1.36732800 | 2.55272500  |
| C | -0.93729100 | -2.52434900 | 1.36880800  |
| H | -0.23065100 | -2.22880900 | 2.15081100  |
| H | -0.37498900 | -2.99982600 | 0.55941100  |
| H | -1.64192300 | -3.24519900 | 1.79721200  |
| C | 0.92661400  | 1.50088400  | 2.96959000  |
| C | 0.49585100  | 0.51734300  | 3.87805100  |
| H | 0.42743200  | -0.52111000 | 3.56397900  |
| C | 0.15072600  | 0.85648600  | 5.18659900  |
| H | -0.17497200 | 0.08168400  | 5.87606800  |
| C | 0.22096500  | 2.18804400  | 5.60956100  |
| H | -0.04885400 | 2.45310900  | 6.62831600  |
| C | 0.63853800  | 3.17440700  | 4.71309500  |
| H | 0.69331900  | 4.21241900  | 5.03077600  |
| C | 0.98964300  | 2.83485900  | 3.40316900  |
| H | 1.30739100  | 3.61770500  | 2.72133600  |
| C | 2.44183800  | -0.39760800 | 1.41990400  |
| H | 1.91324400  | -1.26829200 | 1.81899800  |
| H | 3.28633600  | -0.15686200 | 2.07515000  |
| H | 2.81887100  | -0.65716800 | 0.42452800  |
| C | 2.41760000  | 2.34891400  | 0.62647300  |
| H | 1.85049200  | 3.25909100  | 0.41202400  |
| H | 2.86031500  | 2.00346000  | -0.31288500 |
| H | 3.21656100  | 2.56698000  | 1.34384900  |

|   |             |            |             |
|---|-------------|------------|-------------|
| I | -1.41186000 | 3.09657400 | -0.84530200 |
| C | -3.57582800 | 3.09596400 | 1.93138800  |
| C | -2.74140000 | 2.99272600 | 3.02567700  |
| C | -4.88991200 | 2.67410500 | 1.88712300  |
| C | -3.28619800 | 2.42351800 | 4.18922500  |
| H | -1.70533300 | 3.31642400 | 2.99949200  |
| C | -5.41472100 | 2.10270700 | 3.06017200  |
| H | -5.50044700 | 2.77065100 | 0.99261800  |
| C | -4.61329000 | 1.98008800 | 4.20069500  |
| H | -2.66285400 | 2.31810200 | 5.07373300  |
| H | -6.44509100 | 1.75404200 | 3.07561000  |
| H | -5.02530300 | 1.53405600 | 5.10232000  |

### 5-I-PMePh<sub>2</sub>

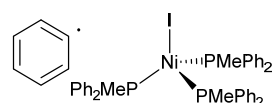

$$E(\text{OSS}) = -2946.82852389$$

$$E(\text{T}) = -2946.82830820$$

$$S^2(\text{OSS}) = 1.0113$$

$$G_{\text{corr}} = 0.66871$$

|    |             |             |             |
|----|-------------|-------------|-------------|
| Ni | -0.82914300 | 0.81738700  | -0.09476500 |
| P  | -0.99630500 | 0.75977400  | -2.40028600 |
| C  | -2.54665700 | -0.02156100 | -3.02420600 |
| C  | -3.67366400 | 0.73562300  | -3.37850400 |
| H  | -3.62706100 | 1.81968900  | -3.38636900 |
| C  | -4.87373800 | 0.10522400  | -3.72136900 |
| H  | -5.73711400 | 0.70722500  | -3.99324100 |
| C  | -4.96352400 | -1.28862200 | -3.71853900 |
| H  | -5.89726000 | -1.77734800 | -3.98348900 |
| C  | -3.84138200 | -2.05153800 | -3.37884000 |
| H  | -3.89810000 | -3.13707200 | -3.37903600 |
| C  | -2.64446000 | -1.42436600 | -3.03468300 |
| H  | -1.78352200 | -2.02842700 | -2.76401600 |
| C  | 0.29435000  | -0.23603600 | -3.25418400 |
| C  | 1.06201600  | -1.12705100 | -2.49144600 |
| H  | 0.91198300  | -1.17991300 | -1.41940300 |
| C  | 2.01792000  | -1.94238600 | -3.10279300 |
| H  | 2.59833200  | -2.63255500 | -2.49726500 |
| C  | 2.22124900  | -1.86587700 | -4.48188100 |
| H  | 2.96814900  | -2.49504600 | -4.95919700 |
| C  | 1.46020200  | -0.97834800 | -5.25070600 |
| H  | 1.61404100  | -0.91852700 | -6.32513600 |
| C  | 0.49784400  | -0.17174000 | -4.64250700 |
| H  | -0.09830400 | 0.49887500  | -5.25516100 |
| C  | -0.94003000 | 2.38719900  | -3.27172900 |
| H  | -1.16629000 | 2.31215900  | -4.33994700 |
| H  | 0.06631700  | 2.79801600  | -3.14315200 |
| H  | -1.64902800 | 3.07600300  | -2.80417400 |
| P  | -2.46799400 | 2.31900000  | 0.60307100  |
| C  | -3.22162100 | 1.97850000  | 2.24412000  |
| C  | -2.38971900 | 1.98245400  | 3.37648900  |

|   |             |             |             |
|---|-------------|-------------|-------------|
| H | -1.33999600 | 2.23856300  | 3.27703900  |
| C | -2.90162100 | 1.64812100  | 4.63075400  |
| H | -2.24367700 | 1.66290300  | 5.49438800  |
| C | -4.24566200 | 1.28956500  | 4.77031100  |
| H | -4.63974300 | 1.01791800  | 5.74611500  |
| C | -5.07752500 | 1.27869500  | 3.64917000  |
| H | -6.12205800 | 0.99474000  | 3.74512500  |
| C | -4.57170600 | 1.62702700  | 2.39414300  |
| H | -5.23537700 | 1.60081700  | 1.53694300  |
| C | -1.78701500 | 4.02238300  | 0.76219600  |
| C | -2.35495300 | 4.98949200  | 1.60570300  |
| H | -3.20059600 | 4.73254300  | 2.23747000  |
| C | -1.82836800 | 6.28162100  | 1.64940800  |
| H | -2.27040600 | 7.02185900  | 2.31135200  |
| C | -0.73512000 | 6.62282400  | 0.84607100  |
| H | -0.32545700 | 7.62876400  | 0.88354700  |
| C | -0.16648300 | 5.66540600  | 0.00162700  |
| H | 0.69047000  | 5.92008000  | -0.61623700 |
| C | -0.68572200 | 4.36893300  | -0.03467000 |
| H | -0.22256500 | 3.61480300  | -0.66345500 |
| C | -3.93018600 | 2.62740100  | -0.48317700 |
| H | -4.62772900 | 3.33521400  | -0.02371100 |
| H | -4.44595500 | 1.69086400  | -0.70964700 |
| H | -3.56481600 | 3.05566600  | -1.41987200 |
| P | -1.24389700 | -1.01566300 | 1.24096100  |
| C | -0.51546300 | -2.54330400 | 0.50794500  |
| C | 0.84949900  | -2.81468600 | 0.70796000  |
| H | 1.44604200  | -2.17411100 | 1.35049300  |
| C | 1.45909500  | -3.89466800 | 0.06601500  |
| H | 2.51522700  | -4.09053700 | 0.23246400  |
| C | 0.71899300  | -4.71485200 | -0.79014000 |
| H | 1.19630400  | -5.55111000 | -1.29382100 |
| C | -0.63809400 | -4.45256900 | -0.99350300 |
| H | -1.22403400 | -5.08710200 | -1.65374900 |
| C | -1.25201600 | -3.37612200 | -0.34928300 |
| H | -2.30675500 | -3.18487100 | -0.52058100 |
| C | -3.03073200 | -1.40900300 | 1.41072000  |
| C | -3.86702800 | -1.07740700 | 0.33195700  |
| H | -3.43996300 | -0.59752100 | -0.54297800 |
| C | -5.23542800 | -1.34711200 | 0.38150100  |
| H | -5.86392000 | -1.09526200 | -0.46859000 |
| C | -5.78957000 | -1.92716800 | 1.52588100  |
| H | -6.85671600 | -2.12757600 | 1.57434800  |
| C | -4.96797800 | -2.24366500 | 2.61154600  |
| H | -5.39621200 | -2.68796700 | 3.50631700  |
| C | -3.59444000 | -1.99498900 | 2.55323900  |
| H | -2.97189300 | -2.25181800 | 3.40479000  |
| C | -0.57820800 | -1.05408700 | 2.96262700  |
| H | -0.60538400 | -2.05779600 | 3.39807100  |
| H | -1.15787000 | -0.36633900 | 3.58248600  |
| H | 0.45531300  | -0.69812000 | 2.93593200  |
| I | 1.79383400  | 1.32691500  | 0.41308500  |
| C | 1.30058500  | 2.90209500  | 3.41749700  |
| C | 1.26057200  | 2.02587700  | 4.48494000  |
| C | 0.69834600  | 4.14460000  | 3.39023300  |

|   |             |            |            |
|---|-------------|------------|------------|
| C | 0.56788000  | 2.44624600 | 5.63350900 |
| H | 1.73858200  | 1.05029100 | 4.44880300 |
| C | 0.00561900  | 4.54507700 | 4.54540200 |
| H | 0.73315100  | 4.78567100 | 2.51438100 |
| C | -0.05468600 | 3.69965900 | 5.65831000 |
| H | 0.51327300  | 1.79163800 | 6.50079000 |
| H | -0.49205900 | 5.51185300 | 4.56347700 |
| H | -0.59671000 | 4.01433800 | 6.54630900 |

### 5-I-PPh<sub>3</sub>

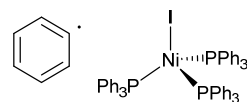

|                        |                |             |             |
|------------------------|----------------|-------------|-------------|
| E (OSS) =              | -3522.20750246 |             |             |
| E (T) =                | -3522.20736581 |             |             |
| S <sup>2</sup> (OSS) = | 1.0130         |             |             |
| G <sub>corr</sub> =    | 0.817883       |             |             |
| Ni                     | -0.40588100    | 0.68315600  | 0.44006400  |
| P                      | -0.13489200    | 0.36030300  | -1.86713900 |
| C                      | -1.48976200    | -0.56292200 | -2.70445400 |
| C                      | -2.76485500    | -0.56204000 | -2.12300600 |
| H                      | -2.92697900    | -0.04271400 | -1.18684000 |
| C                      | -3.82188700    | -1.23799200 | -2.73649600 |
| H                      | -4.80454200    | -1.22761900 | -2.27369400 |
| C                      | -3.61264800    | -1.92540000 | -3.93452300 |
| H                      | -4.43374700    | -2.45593700 | -4.40952400 |
| C                      | -2.34197800    | -1.93510500 | -4.51896700 |
| H                      | -2.17230400    | -2.47300100 | -5.44811700 |
| C                      | -1.28423400    | -1.26230500 | -3.90518400 |
| H                      | -0.29726200    | -1.29058900 | -4.35720600 |
| C                      | 1.35227300     | -0.63351900 | -2.29498000 |
| C                      | 1.63618300     | -1.74050100 | -1.48068500 |
| H                      | 0.98102200     | -1.97856100 | -0.64952300 |
| C                      | 2.76525300     | -2.52282800 | -1.72522300 |
| H                      | 2.97720100     | -3.36729800 | -1.07832000 |
| C                      | 3.62349400     | -2.20336000 | -2.78058400 |
| H                      | 4.50963000     | -2.80580400 | -2.96316100 |
| C                      | 3.34415400     | -1.10460600 | -3.59844600 |
| H                      | 4.00830200     | -0.85304800 | -4.42148200 |
| C                      | 2.21153300     | -0.32210300 | -3.35996100 |
| H                      | 2.00588100     | 0.53446700  | -3.99491000 |
| P                      | -1.82372700    | 2.58387300  | 0.61679400  |
| C                      | -2.59607900    | 2.84107100  | 2.28168700  |
| C                      | -2.59040300    | 4.08745400  | 2.92931300  |
| H                      | -2.15907900    | 4.95648100  | 2.44479600  |
| C                      | -3.13634300    | 4.22500600  | 4.20764900  |
| H                      | -3.11984300    | 5.19680200  | 4.69429100  |
| C                      | -3.70074100    | 3.12470400  | 4.85746100  |
| H                      | -4.12409700    | 3.23477800  | 5.85236700  |

|   |             |             |             |
|---|-------------|-------------|-------------|
| C | -3.71351700 | 1.88107100  | 4.22070900  |
| H | -4.14516200 | 1.01513300  | 4.71570400  |
| C | -3.15992400 | 1.73884000  | 2.94692700  |
| H | -3.14961600 | 0.76149100  | 2.47733500  |
| C | -1.04349600 | 4.22527500  | 0.31405700  |
| C | -1.71789100 | 5.32598900  | -0.23655300 |
| H | -2.75410000 | 5.23439300  | -0.54573200 |
| C | -1.06068800 | 6.54842900  | -0.39345700 |
| H | -1.59072600 | 7.39054600  | -0.83060400 |
| C | 0.26881700  | 6.69113200  | 0.01339900  |
| H | 0.77784500  | 7.64321700  | -0.11173900 |
| C | 0.94079800  | 5.60526000  | 0.58125500  |
| H | 1.97606000  | 5.70068600  | 0.89507100  |
| C | 0.28696800  | 4.38172800  | 0.72606900  |
| H | 0.81672400  | 3.53346000  | 1.14420000  |
| P | 1.76003800  | 0.63596600  | 1.45006800  |
| C | 1.61419700  | 1.02358300  | 3.24760000  |
| C | 0.35435700  | 1.34367800  | 3.76936000  |
| H | -0.51350900 | 1.34541700  | 3.12114900  |
| C | 0.19870900  | 1.64004200  | 5.12618600  |
| H | -0.78820000 | 1.88499300  | 5.50943500  |
| C | 1.30694900  | 1.61415300  | 5.97448200  |
| H | 1.19124300  | 1.84382800  | 7.03050000  |
| C | 2.56816500  | 1.28196000  | 5.46567000  |
| H | 3.43088700  | 1.25169800  | 6.12605700  |
| C | 2.72159100  | 0.98310000  | 4.11197300  |
| H | 3.70154100  | 0.71780700  | 3.72430100  |
| C | 2.96175900  | 1.88106700  | 0.80786600  |
| C | 3.37699600  | 3.00442200  | 1.53911300  |
| H | 3.03939100  | 3.14825800  | 2.56014100  |
| C | 4.22208700  | 3.95533900  | 0.95903900  |
| H | 4.53233300  | 4.81966700  | 1.54058500  |
| C | 4.66680600  | 3.79757800  | -0.35527400 |
| H | 5.32176700  | 4.53972500  | -0.80373600 |
| C | 4.26613000  | 2.67692500  | -1.08858500 |
| H | 4.60398700  | 2.54000200  | -2.11239200 |
| C | 3.41880200  | 1.73020000  | -0.51395700 |
| H | 3.11466300  | 0.86734000  | -1.09668000 |
| C | 2.77779900  | -0.91180800 | 1.52095900  |
| C | 2.13290200  | -2.09221900 | 1.92725200  |
| C | 4.14777000  | -0.95829400 | 1.22367600  |
| C | 2.84134000  | -3.28958300 | 2.02740700  |
| H | 1.07152700  | -2.08073300 | 2.15251900  |
| C | 4.85285700  | -2.16161200 | 1.31555100  |
| H | 4.67512500  | -0.06306000 | 0.91320800  |
| C | 4.20394300  | -3.33053200 | 1.71684200  |
| H | 2.32474000  | -4.19150300 | 2.34358300  |
| H | 5.91285600  | -2.17963000 | 1.07508700  |
| H | 4.75397400  | -4.26522200 | 1.78874500  |

|   |             |             |             |
|---|-------------|-------------|-------------|
| C | -3.25323200 | 2.54371700  | -0.55156200 |
| C | -3.04432200 | 2.89675500  | -1.89669900 |
| C | -4.50264500 | 2.02577000  | -0.17706500 |
| C | -4.05769700 | 2.73445300  | -2.84079300 |
| H | -2.08922800 | 3.29998400  | -2.21157500 |
| C | -5.51452500 | 1.86098900  | -1.12672400 |
| H | -4.69613800 | 1.74421200  | 0.85246800  |
| C | -5.29598100 | 2.21064700  | -2.46113300 |
| H | -3.87135100 | 3.00983400  | -3.87548800 |
| H | -6.47549900 | 1.45805200  | -0.81779800 |
| H | -6.08310800 | 2.07604900  | -3.19809800 |
| C | 0.06073000  | 1.89231200  | -2.86807900 |
| C | 0.74273000  | 2.95674200  | -2.26082200 |
| C | -0.46449100 | 2.06683700  | -4.15775400 |
| C | 0.90015700  | 4.17458100  | -2.92287600 |
| H | 1.12886400  | 2.83789600  | -1.25614000 |
| C | -0.31310600 | 3.28829200  | -4.81826900 |
| H | -1.01010500 | 1.26275100  | -4.64055100 |
| C | 0.36657100  | 4.34434100  | -4.20286700 |
| H | 1.41867400  | 4.98990600  | -2.42678400 |
| H | -0.73247500 | 3.41621700  | -5.81291700 |
| H | 0.47345400  | 5.29582100  | -4.71720700 |
| I | -1.71863700 | -1.49268900 | 1.40740900  |
| C | -0.68932000 | -4.30022600 | -0.44170500 |
| C | -1.10708800 | -4.02038000 | -1.72671900 |
| C | 0.38617900  | -5.09841400 | -0.10791500 |
| C | -0.37889700 | -4.61075900 | -2.77306200 |
| H | -1.94645400 | -3.36352900 | -1.93217900 |
| C | 1.10013200  | -5.68127800 | -1.16965500 |
| H | 0.67953800  | -5.27447800 | 0.92346500  |
| C | 0.71610100  | -5.43485000 | -2.49236000 |
| H | -0.66684400 | -4.41262100 | -3.80257800 |
| H | 1.95642700  | -6.31808400 | -0.95758600 |
| H | 1.27831100  | -5.88132500 | -3.30843500 |

### 5-Br-PMe<sub>3</sub>

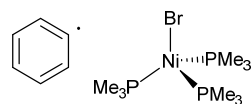

$$E(\text{OSS}) = -1797.83450227$$

$$E(\text{T}) = -1797.83414397$$

$$S^2(\text{OSS}) = 1.0115$$

$$G_{\text{corr}} = 0.368688$$

|    |             |            |             |
|----|-------------|------------|-------------|
| Ni | -0.52646100 | 0.51920300 | 0.11520900  |
| P  | -1.03997200 | 2.06473100 | -1.51557600 |
| C  | -1.42631300 | 3.72917300 | -0.81907400 |
| C  | -2.59719800 | 1.66490900 | -2.41914000 |
| C  | 0.11530300  | 2.49095400 | -2.89387400 |

|    |             |             |             |
|----|-------------|-------------|-------------|
| H  | -1.79433000 | 4.41688200  | -1.58995200 |
| H  | -0.52683600 | 4.15598100  | -0.36337400 |
| H  | -2.90587200 | 2.47993200  | -3.08457900 |
| H  | -3.38389700 | 1.47166000  | -1.68295500 |
| H  | 0.31938200  | 1.59814900  | -3.49366700 |
| H  | 1.06447500  | 2.84831300  | -2.47981100 |
| P  | 1.03040700  | 1.65022300  | 1.36496800  |
| P  | -0.09244600 | -1.45615200 | -0.97251200 |
| C  | 2.25490800  | 2.67407800  | 0.42725800  |
| C  | 2.15241700  | 0.66673300  | 2.45797200  |
| C  | 0.36023400  | 2.88318800  | 2.56550700  |
| C  | 0.10131400  | -1.35316700 | -2.80825500 |
| C  | 1.44831400  | -2.37213500 | -0.51399800 |
| C  | -1.37002500 | -2.77764800 | -0.80861200 |
| H  | 2.98539300  | 3.14266300  | 1.09823000  |
| H  | 1.73326900  | 3.46241400  | -0.12574400 |
| H  | 2.89546400  | 1.30627100  | 2.94968800  |
| H  | 2.66967600  | -0.09317300 | 1.86277500  |
| H  | -0.28906500 | 2.36540100  | 3.27876600  |
| H  | -0.25073800 | 3.61649700  | 2.02946700  |
| H  | 0.94081200  | -0.69281900 | -3.04955300 |
| H  | -0.80728900 | -0.93341200 | -3.25180000 |
| H  | 2.31928000  | -1.73121600 | -0.69074700 |
| H  | 1.55776000  | -3.29401600 | -1.09859300 |
| H  | -1.51614200 | -3.00782400 | 0.25122300  |
| H  | -1.08436900 | -3.69150900 | -1.34388000 |
| H  | -2.18704700 | 3.61769000  | -0.03997200 |
| H  | -2.45523800 | 0.75444900  | -3.01115800 |
| H  | -0.30399200 | 3.26756600  | -3.54465100 |
| H  | 0.28665300  | -2.34035100 | -3.24915300 |
| H  | 1.41719600  | -2.62924600 | 0.54910800  |
| H  | -2.32156600 | -2.40563500 | -1.20299500 |
| H  | 1.15903400  | 3.40245500  | 3.10936300  |
| H  | 2.78560500  | 2.04210200  | -0.29313400 |
| H  | 1.55995300  | 0.16142200  | 3.22666500  |
| Br | -2.69413700 | 0.39703300  | 1.41336500  |
| C  | -1.39611700 | -2.90546100 | 3.02771100  |
| C  | -0.24156200 | -2.17690000 | 2.83695700  |
| C  | -1.48129600 | -4.14069000 | 3.63498000  |
| C  | 0.95034100  | -2.75368600 | 3.31042000  |
| H  | -0.25430800 | -1.21121000 | 2.33860700  |
| C  | -0.27637600 | -4.69855300 | 4.09947400  |
| H  | -2.42400500 | -4.66812100 | 3.75781300  |
| C  | 0.92768500  | -4.00582000 | 3.93544500  |
| H  | 1.89044700  | -2.22209400 | 3.18669600  |
| H  | -0.28666700 | -5.67107200 | 4.58643900  |
| H  | 1.85407100  | -4.44311900 | 4.29842700  |

### 5-Cl-PMe<sub>3</sub>

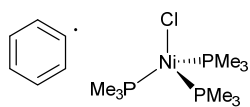

$$E(\text{OSS}) = -2244.88718919$$

|                      |             |                |             |
|----------------------|-------------|----------------|-------------|
| E (T)                | =           | -2244.88685062 |             |
| S <sup>2</sup> (OSS) | =           | 1.0118         |             |
| G <sub>corr</sub>    | =           | 0.370729       |             |
| Ni                   | 1.55939600  | 1.02993200     | 0.06773100  |
| P                    | 1.04825600  | 2.57899500     | -1.56715400 |
| C                    | 0.70765900  | 4.26514800     | -0.89608100 |
| C                    | -0.52776500 | 2.20181400     | -2.44952300 |
| C                    | 2.19308300  | 2.96344700     | -2.96638200 |
| H                    | 0.35866800  | 4.94908200     | -1.67891300 |
| H                    | 1.61833100  | 4.67552900     | -0.44749100 |
| H                    | -0.82126400 | 3.01148300     | -3.12816800 |
| H                    | -1.31737300 | 2.04269800     | -1.70812500 |
| H                    | 2.36051000  | 2.06418000     | -3.56739000 |
| H                    | 3.15912300  | 3.29502900     | -2.57040900 |
| P                    | 3.14451200  | 2.15052800     | 1.29508500  |
| P                    | 2.01828400  | -0.93475900    | -1.03686400 |
| C                    | 4.36990300  | 3.14620100     | 0.32855300  |
| C                    | 4.27115900  | 1.16728500     | 2.38392700  |
| C                    | 2.51152200  | 3.40874100     | 2.49158400  |
| C                    | 2.22532100  | -0.82001700    | -2.87031200 |
| C                    | 3.55355400  | -1.85948900    | -0.57730800 |
| C                    | 0.73865200  | -2.25829400    | -0.89125900 |
| H                    | 5.11802800  | 3.61091800     | 0.98258200  |
| H                    | 3.85238500  | 3.93654800     | -0.22533100 |
| H                    | 5.02233300  | 1.80499100     | 2.86561100  |
| H                    | 4.77967600  | 0.40239300     | 1.78756600  |
| H                    | 1.87482100  | 2.90929700     | 3.22954500  |
| H                    | 1.89618400  | 4.14049600     | 1.95788100  |
| H                    | 3.07626400  | -0.17022700    | -3.09997100 |
| H                    | 1.32617200  | -0.38313200    | -3.31676500 |
| H                    | 4.42774900  | -1.22032100    | -0.74409600 |
| H                    | 3.66359800  | -2.77651900    | -1.16934400 |
| H                    | 0.58548900  | -2.49827600    | 0.16578600  |
| H                    | 1.02730800  | -3.16861300    | -1.43074800 |
| H                    | -0.05682800 | 4.19294300     | -0.11575800 |
| H                    | -0.41277400 | 1.27685600     | -3.02492000 |
| H                    | 1.78570500  | 3.75014000     | -3.61250100 |
| H                    | 2.39937500  | -1.80582900    | -3.31870400 |
| H                    | 3.51683300  | -2.12683800    | 0.48315200  |
| H                    | -0.21062200 | -1.88502100    | -1.29104400 |
| H                    | 3.32608200  | 3.92850700     | 3.01070900  |
| H                    | 4.88037700  | 2.49875300     | -0.39274700 |
| H                    | 3.68349800  | 0.66830000     | 3.16033600  |
| C                    | 0.68597800  | -2.34195600    | 2.94746600  |
| C                    | 1.85798100  | -1.64349800    | 2.75283900  |
| C                    | 0.56468800  | -3.55656800    | 3.58863100  |
| C                    | 3.03056700  | -2.23191100    | 3.25952600  |
| H                    | 1.87552500  | -0.69278400    | 2.22682300  |
| C                    | 1.75067100  | -4.12626300    | 4.08616800  |
| H                    | -0.39103800 | -4.05952800    | 3.71303700  |
| C                    | 2.97177800  | -3.46452800    | 3.91950700  |
| H                    | 3.98335100  | -1.72384500    | 3.13391400  |
| H                    | 1.71235800  | -5.08358100    | 4.60100600  |
| H                    | 3.88322600  | -3.91105500    | 4.30813000  |



Cl -0.47285000 0.85701500 1.30676200

**6-I-PMe<sub>3</sub>**

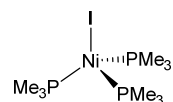

E = -1564.41378215

G<sub>corr</sub> = 0.285068

|    |             |             |             |
|----|-------------|-------------|-------------|
| Ni | 3.19335000  | 7.61491500  | 11.71328600 |
| P  | 1.42114100  | 8.89806000  | 11.02938100 |
| C  | 0.92926700  | 10.20501400 | 12.23542700 |
| C  | -0.14454400 | 7.94826000  | 10.80984700 |
| C  | 1.53713400  | 9.85467100  | 9.45469000  |
| H  | 0.00722700  | 10.71403700 | 11.93061000 |
| H  | 1.73419900  | 10.94368500 | 12.31335900 |
| H  | -0.99097200 | 8.60345000  | 10.57235500 |
| H  | -0.35757600 | 7.39969300  | 11.73337800 |
| H  | 1.66951500  | 9.16654200  | 8.61384500  |
| H  | 2.41126400  | 10.51382600 | 9.49478900  |
| P  | 4.67452100  | 9.10374900  | 12.61927200 |
| P  | 3.72089000  | 6.19142300  | 10.00155600 |
| C  | 5.17192800  | 10.56633900 | 11.60707600 |
| C  | 6.29539000  | 8.30412600  | 12.99476300 |
| C  | 4.24443100  | 9.87664900  | 14.23909700 |
| C  | 3.47263200  | 6.77897500  | 8.26781500  |
| C  | 5.51298200  | 5.74015200  | 9.99938200  |
| C  | 2.91216400  | 4.53276300  | 9.96311700  |
| H  | 5.94598000  | 11.16362400 | 12.10392800 |
| H  | 4.29733600  | 11.20149600 | 11.42812700 |
| H  | 6.99713300  | 9.00042000  | 13.46914000 |
| H  | 6.73882700  | 7.92256500  | 12.06883300 |
| H  | 4.00335100  | 9.08339400  | 14.95427800 |
| H  | 3.35683100  | 10.50649200 | 14.12017600 |
| H  | 3.98225500  | 7.73855400  | 8.13028300  |
| H  | 2.40375800  | 6.92744900  | 8.08120600  |
| H  | 6.11448200  | 6.64307500  | 9.84946500  |
| H  | 5.74919300  | 5.01732500  | 9.20899900  |
| H  | 3.14119400  | 4.00121000  | 10.89240200 |
| H  | 3.25166400  | 3.93374700  | 9.10942800  |
| H  | 0.78299700  | 9.74791500  | 13.21948000 |
| H  | -0.01831900 | 7.21718900  | 10.00393800 |
| H  | 0.63923400  | 10.46021600 | 9.28337800  |
| H  | 3.86141000  | 6.05808400  | 7.53849000  |
| H  | 5.77644700  | 5.30789500  | 10.97047500 |
| H  | 1.82558000  | 4.65920500  | 9.90808200  |
| H  | 5.06726700  | 10.48533600 | 14.63304300 |
| H  | 5.55019000  | 10.22549200 | 10.63698000 |
| H  | 6.12182700  | 7.45502400  | 13.66458500 |
| I  | 2.49872700  | 6.02825200  | 13.83966400 |

### 6-I-PMe<sub>2</sub>Ph

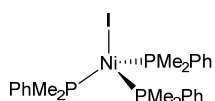

|                   |   |                                     |
|-------------------|---|-------------------------------------|
| E                 | = | -2139.7985927                       |
| G <sub>corr</sub> | = | 0.434689                            |
| Ni                |   | -0.46362800 1.21841800 -0.09111500  |
| P                 |   | 0.03894400 0.13975600 -2.06019400   |
| P                 |   | -1.93893900 -0.17262100 0.98647200  |
| P                 |   | 1.30022600 1.36634700 1.36474300    |
| C                 |   | 1.73705100 0.66483800 -2.54471300   |
| C                 |   | 2.03141300 2.03737700 -2.44873600   |
| H                 |   | 1.26480900 2.72544300 -2.09743600   |
| C                 |   | 3.30133900 2.51779400 -2.77160900   |
| H                 |   | 3.51084800 3.58162000 -2.69537400   |
| C                 |   | 4.30389700 1.63001400 -3.17500400   |
| H                 |   | 5.29639100 2.00072800 -3.41734100   |
| C                 |   | 4.02606400 0.26374900 -3.25997500   |
| H                 |   | 4.80234000 -0.43143000 -3.56966700  |
| C                 |   | 2.74963700 -0.21745700 -2.95155500  |
| H                 |   | 2.55443100 -1.28303400 -3.02847300  |
| C                 |   | -0.91300800 0.40014300 -3.62396700  |
| H                 |   | -1.92519300 0.00436800 -3.49237300  |
| H                 |   | -0.43513600 -0.09777100 -4.47535000 |
| H                 |   | -0.98541400 1.47388900 -3.82410200  |
| C                 |   | 0.11997800 -1.69945500 -1.96995800  |
| H                 |   | -0.88360200 -2.06743700 -1.73433200 |
| H                 |   | 0.79409100 -1.99752900 -1.16076200  |
| H                 |   | 0.44883200 -2.15868800 -2.90864800  |
| C                 |   | -3.06485900 -1.02538300 -0.18939800 |
| C                 |   | -3.37660600 -2.39189900 -0.13477600 |
| H                 |   | -2.96891600 -3.01912700 0.65274100  |
| C                 |   | -4.21194000 -2.96474000 -1.09948100 |
| H                 |   | -4.44108500 -4.02627000 -1.05077900 |
| C                 |   | -4.75161400 -2.17831300 -2.11983200 |
| H                 |   | -5.40136400 -2.62574100 -2.86736200 |
| C                 |   | -4.44970400 -0.81369900 -2.17889200 |
| H                 |   | -4.86207400 -0.19631800 -2.97274700 |
| C                 |   | -3.60417000 -0.24352600 -1.22659000 |
| H                 |   | -3.33774700 0.80923100 -1.29436200  |
| C                 |   | -3.12167600 0.67428000 2.12405600   |
| H                 |   | -3.63549900 1.46960800 1.57583500   |
| H                 |   | -2.56304200 1.12996400 2.94744400   |
| H                 |   | -3.85875700 -0.02914800 2.52687800  |
| C                 |   | -1.25313000 -1.50644300 2.05520100  |
| H                 |   | -0.61949000 -1.02932300 2.81014600  |
| H                 |   | -0.63339000 -2.18297300 1.45792500  |
| H                 |   | -2.03328700 -2.08257400 2.56450900  |
| C                 |   | 0.83291800 1.51040900 3.13717500    |
| C                 |   | 1.42179900 0.76664800 4.17103900    |
| H                 |   | 2.22347900 0.06583000 3.95828900    |
| C                 |   | 0.97962900 0.91500400 5.48958500    |
| H                 |   | 1.44043200 0.32852400 6.28045400    |

|   |  |                                    |
|---|--|------------------------------------|
| C |  | -0.04558100 1.81404600 5.79150300  |
| H |  | -0.38593700 1.92848000 6.81729900  |
| C |  | -0.63738600 2.56121500 4.76757500  |
| H |  | -1.44175400 3.25663100 4.99298900  |
| C |  | -0.20922500 2.40174900 3.44913600  |
| H |  | -0.69712200 2.95188800 2.64746900  |
| C |  | 2.48677900 -0.04467300 1.29934200  |
| H |  | 1.97514100 -0.97590500 1.56313200  |
| H |  | 3.35185000 0.09365500 1.95762500   |
| H |  | 2.84201300 -0.12808800 0.26660300  |
| C |  | 2.42416700 2.81434900 1.12461400   |
| H |  | 1.83768800 3.73674200 1.18115000   |
| H |  | 2.87084900 2.75110500 0.12724700   |
| H |  | 3.21752200 2.83730700 1.87984100   |
| I |  | -1.56805600 3.63130000 -0.51879800 |

### 6-I-PMePh<sub>2</sub>

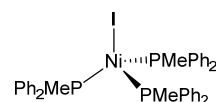

|                   |   |                                     |
|-------------------|---|-------------------------------------|
| E                 | = | -2715.18416817                      |
| G <sub>corr</sub> | = | 0.58561                             |
| Ni                |   | 0.77183100 0.79556700 0.03949200    |
| P                 |   | 0.80753700 0.85591400 -2.25606400   |
| C                 |   | -0.73225800 0.13153800 -2.96427300  |
| C                 |   | -1.86958400 0.92691100 -3.17833600  |
| H                 |   | -1.81996300 2.00293400 -3.04201500  |
| C                 |   | -3.07996900 0.34641000 -3.56649900  |
| H                 |   | -3.95010200 0.97711200 -3.72994600  |
| C                 |   | -3.17188300 -1.03620100 -3.74701900 |
| H                 |   | -4.11407400 -1.48696800 -4.04679000 |
| C                 |   | -2.04229000 -1.83481700 -3.54444600 |
| H                 |   | -2.10170200 -2.91071900 -3.68719500 |
| C                 |   | -0.83281000 -1.25731500 -3.15659200 |
| H                 |   | 0.03346700 -1.89137700 -2.99336500  |
| C                 |   | 2.12623800 -0.15772600 -3.03843200  |
| C                 |   | 2.82698600 -1.06694800 -2.23298700  |
| H                 |   | 2.60346100 -1.12769900 -1.17319300  |
| C                 |   | 3.80774000 -1.89444400 -2.78586900  |
| H                 |   | 4.33557800 -2.59776300 -2.14857500  |
| C                 |   | 4.10164700 -1.81383900 -4.14826700  |
| H                 |   | 4.86726000 -2.45330900 -4.58002800  |
| C                 |   | 3.40761800 -0.90906000 -4.95924000  |
| H                 |   | 3.63246800 -0.84615600 -6.02089300  |
| C                 |   | 2.42187100 -0.08853600 -4.40998500  |
| H                 |   | 1.88017800 0.59721400 -5.05552200   |
| C                 |   | 0.94198700 2.49319800 -3.10153700   |
| H                 |   | 0.78656700 2.42615600 -4.18275000   |
| H                 |   | 1.93987600 2.89549600 -2.90102600   |
| H                 |   | 0.20800000 3.18389100 -2.67726600   |
| P                 |   | -0.80083700 2.33419500 0.77010800   |
| C                 |   | -1.11560400 2.07575800 2.56197400   |
| C                 |   | -0.12738300 2.45055500 3.48903300   |

|   |             |             |             |
|---|-------------|-------------|-------------|
| H | 0.76617000  | 2.96655600  | 3.14873800  |
| C | -0.28338900 | 2.15943400  | 4.84405600  |
| H | 0.48635500  | 2.45921500  | 5.55024200  |
| C | -1.41985700 | 1.47653700  | 5.29084700  |
| H | -1.53697000 | 1.24391000  | 6.34598200  |
| C | -2.40106700 | 1.09200800  | 4.37444000  |
| H | -3.28401900 | 0.55462300  | 4.71065300  |
| C | -2.25246000 | 1.39024800  | 3.01699800  |
| H | -3.02015200 | 1.07053000  | 2.31977800  |
| C | -0.21380800 | 4.07512300  | 0.67898400  |
| C | -0.93476600 | 5.13050100  | 1.26172900  |
| H | -1.84861800 | 4.92615000  | 1.81372000  |
| C | -0.47645500 | 6.44279100  | 1.14607800  |
| H | -1.03777600 | 7.25394800  | 1.60258900  |
| C | 0.70524000  | 6.71440700  | 0.44663100  |
| H | 1.06064500  | 7.73780600  | 0.35901800  |
| C | 1.42880400  | 5.66993400  | -0.13206400 |
| H | 2.35084000  | 5.87389900  | -0.67008700 |
| C | 0.97243900  | 4.35398900  | -0.01306300 |
| H | 1.54197800  | 3.53571200  | -0.44170200 |
| C | -2.49890700 | 2.48286000  | 0.05334800  |
| H | -3.12140300 | 3.16284400  | 0.64422000  |
| H | -2.98224300 | 1.50498600  | 0.00030900  |
| H | -2.40790100 | 2.87820700  | -0.96193300 |
| P | 0.19163300  | -1.07276100 | 1.26852400  |
| C | 1.02094300  | -2.56613000 | 0.58144500  |
| C | 2.34977100  | -2.84887800 | 0.94144000  |
| H | 2.85660400  | -2.24075300 | 1.68467500  |
| C | 3.03911800  | -3.89985400 | 0.33203200  |
| H | 4.06602400  | -4.10688800 | 0.62192100  |
| C | 2.41603100  | -4.67713500 | -0.64809600 |
| H | 2.95533300  | -5.49117200 | -1.12471300 |
| C | 1.09574700  | -4.40028900 | -1.01287600 |
| H | 0.60206100  | -5.00019500 | -1.77325200 |
| C | 0.40268500  | -3.35217800 | -0.40422500 |
| H | -0.62092400 | -3.14537600 | -0.70148900 |
| C | -1.59326500 | -1.50545800 | 1.26658500  |
| C | -2.35936000 | -1.10658800 | 0.16031500  |
| H | -1.88049100 | -0.57110900 | -0.65303400 |
| C | -3.72869200 | -1.37774500 | 0.10706200  |
| H | -4.30371000 | -1.06682900 | -0.76078100 |
| C | -4.35057300 | -2.03580900 | 1.17119000  |
| H | -5.41800700 | -2.23791000 | 1.13912300  |
| C | -3.59556800 | -2.43462900 | 2.27894700  |
| H | -4.07553100 | -2.94713100 | 3.10864600  |
| C | -2.22364700 | -2.17842800 | 2.32475400  |
| H | -1.65253800 | -2.49597800 | 3.19181500  |
| C | 0.67114600  | -1.10269600 | 3.04895800  |
| H | 0.63805300  | -2.10899900 | 3.47753600  |
| H | 0.00065900  | -0.44258800 | 3.60485300  |
| H | 1.68550300  | -0.70314100 | 3.13386400  |
| I | 3.28360800  | 1.28260500  | 0.98221000  |

### 6-I-PPh<sub>3</sub>

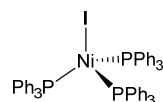

|                   |             |                |             |
|-------------------|-------------|----------------|-------------|
| E                 | =           | -3290.56151807 |             |
| G <sub>corr</sub> | =           | 0.735468       |             |
| Ni                | 0.65210800  | 1.08207100     | 0.07069000  |
| P                 | 1.06762700  | 1.08895100     | -2.24545900 |
| C                 | -0.09917500 | 0.12626300     | -3.29572800 |
| C                 | -1.41722500 | -0.04978300    | -2.85304800 |
| H                 | -1.71419600 | 0.33553700     | -1.88643100 |
| C                 | -2.34323600 | -0.73336300    | -3.64338600 |
| H                 | -3.36210200 | -0.85646600    | -3.28732700 |
| C                 | -1.95764100 | -1.25910500    | -4.87865100 |
| H                 | -2.67699200 | -1.79609000    | -5.49158200 |
| C                 | -0.64096900 | -1.10029200    | -5.32188100 |
| H                 | -0.33289800 | -1.51307700    | -6.27902800 |
| C                 | 0.28480300  | -0.41250700    | -4.53520500 |
| H                 | 1.30587400  | -0.29664700    | -4.88680100 |
| C                 | 2.68730900  | 0.35110200     | -2.71217400 |
| C                 | 2.97978200  | -0.92370400    | -2.19944300 |
| H                 | 2.26755500  | -1.41771500    | -1.54437600 |
| C                 | 4.18325700  | -1.55101100    | -2.51858600 |
| H                 | 4.40116100  | -2.53221600    | -2.10836200 |
| C                 | 5.11651800  | -0.90629100    | -3.33611800 |
| H                 | 6.05982900  | -1.39156800    | -3.57230100 |
| C                 | 4.83524600  | 0.36390700     | -3.84371600 |
| H                 | 5.55606700  | 0.86969800     | -4.48101100 |
| C                 | 3.62204000  | 0.98939000     | -3.54015500 |
| H                 | 3.40824300  | 1.97326500     | -3.94719100 |
| P                 | -1.02854700 | 2.72145200     | 0.38293300  |
| C                 | -1.99148500 | 2.58561200     | 1.95748800  |
| C                 | -2.84358200 | 3.61406900     | 2.39506400  |
| H                 | -2.94762000 | 4.52399800     | 1.81175800  |
| C                 | -3.55882200 | 3.47903300     | 3.58467800  |
| H                 | -4.21280400 | 4.28247900     | 3.91367100  |
| C                 | -3.43420800 | 2.31626400     | 4.35333000  |
| H                 | -3.99047900 | 2.21529900     | 5.28159000  |
| C                 | -2.59275400 | 1.28885400     | 3.92425800  |
| H                 | -2.48569000 | 0.38229800     | 4.51386400  |
| C                 | -1.87539600 | 1.42355500     | 2.73195300  |
| H                 | -1.22038500 | 0.62402400     | 2.40452500  |
| C                 | -0.47535100 | 4.48437900     | 0.43464500  |
| C                 | -1.24807100 | 5.56489400     | -0.01858000 |
| H                 | -2.22889500 | 5.39409700     | -0.45000600 |
| C                 | -0.75782100 | 6.87023400     | 0.06658700  |
| H                 | -1.36509900 | 7.69549400     | -0.29594500 |
| C                 | 0.50499700  | 7.11522100     | 0.61213200  |
| H                 | 0.88566400  | 8.13139800     | 0.67183500  |
| C                 | 1.27725000  | 6.04661800     | 1.07644200  |
| H                 | 2.26535000  | 6.21956600     | 1.49328400  |
| C                 | 0.78860100  | 4.74318400     | 0.98560700  |
| H                 | 1.40466800  | 3.91796500     | 1.32333900  |

|   |             |             |             |
|---|-------------|-------------|-------------|
| P | 2.76321600  | 1.16772100  | 1.13998300  |
| C | 2.51953200  | 1.18296600  | 2.96962200  |
| C | 1.37166000  | 1.80951800  | 3.47578700  |
| H | 0.65546000  | 2.24586100  | 2.79050000  |
| C | 1.13661100  | 1.87047800  | 4.85002000  |
| H | 0.23310900  | 2.34763700  | 5.21967400  |
| C | 2.05259500  | 1.30113600  | 5.73766800  |
| H | 1.87040500  | 1.33859600  | 6.80843600  |
| C | 3.20253400  | 0.67727200  | 5.24403200  |
| H | 3.91849400  | 0.23327900  | 5.93072500  |
| C | 3.43796100  | 0.61846500  | 3.86898200  |
| H | 4.33456400  | 0.13080300  | 3.49910000  |
| C | 3.78498500  | 2.67723400  | 0.84518900  |
| C | 4.08707400  | 3.59904600  | 1.85947600  |
| H | 3.76279000  | 3.41577800  | 2.87864500  |
| C | 4.80103000  | 4.76462900  | 1.56692200  |
| H | 5.02401200  | 5.46961900  | 2.36364300  |
| C | 5.22952400  | 5.02125500  | 0.26244500  |
| H | 5.78278400  | 5.92914900  | 0.03752200  |
| C | 4.94593400  | 4.10117000  | -0.75086300 |
| H | 5.27620400  | 4.28716900  | -1.76938100 |
| C | 4.22616300  | 2.94166000  | -0.46283700 |
| H | 4.01535700  | 2.23512000  | -1.25868000 |
| C | 3.97233600  | -0.21212100 | 0.92805300  |
| C | 3.49718500  | -1.52124300 | 1.11757700  |
| C | 5.32639000  | -0.02064500 | 0.61940600  |
| C | 4.35738400  | -2.61218200 | 0.99936500  |
| H | 2.45072200  | -1.68756000 | 1.35148100  |
| C | 6.18367800  | -1.11695200 | 0.48928600  |
| H | 5.72271800  | 0.97872300  | 0.47677800  |
| C | 5.70438300  | -2.41401900 | 0.67987100  |
| H | 3.97244300  | -3.61734700 | 1.14996100  |
| H | 7.22929300  | -0.95150500 | 0.24274100  |
| H | 6.37395000  | -3.26430300 | 0.58029900  |
| C | -2.35542400 | 2.69637300  | -0.89541600 |
| C | -2.15345800 | 3.30042000  | -2.14826100 |
| C | -3.52257200 | 1.94400900  | -0.68532600 |
| C | -3.09895300 | 3.15732100  | -3.16419600 |
| H | -1.26045400 | 3.88542500  | -2.33450400 |
| C | -4.46411200 | 1.79892400  | -1.70689100 |
| H | -3.69688400 | 1.46403100  | 0.27279900  |
| C | -4.25551500 | 2.40351700  | -2.94908600 |
| H | -2.92376900 | 3.63123200  | -4.12640100 |
| H | -5.36135500 | 1.21218000  | -1.52825900 |
| H | -4.98794200 | 2.28701600  | -3.74334600 |
| C | 1.09151600  | 2.75940000  | -3.01563700 |
| C | 1.50748000  | 3.82219600  | -2.20117600 |
| C | 0.66929500  | 3.02977600  | -4.32644000 |
| C | 1.50174400  | 5.13364000  | -2.67742600 |
| H | 1.81019000  | 3.62105400  | -1.18158200 |
| C | 0.65644700  | 4.34280300  | -4.80205200 |
| H | 0.33190600  | 2.22372100  | -4.97022500 |
| C | 1.06867100  | 5.39660000  | -3.97929300 |
| H | 1.81161400  | 5.94268700  | -2.02210700 |
| H | 0.31835900  | 4.54385500  | -5.81528600 |

|   |             |             |             |
|---|-------------|-------------|-------------|
| H | 1.04612200  | 6.41759200  | -4.35111500 |
| I | -0.38680000 | -1.41962600 | 0.48720400  |

### 6-Br-PMe<sub>3</sub>

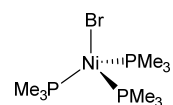

|                   |             |                |             |
|-------------------|-------------|----------------|-------------|
| E                 | =           | -1566.19226774 |             |
| G <sub>corr</sub> | =           | 0.287107       |             |
| Ni                | 3.03250300  | 7.55801000     | 11.77588700 |
| P                 | 1.26707200  | 8.91609400     | 11.22903400 |
| C                 | 0.71294900  | 10.24606300    | 12.38905900 |
| C                 | -0.30556700 | 7.98865100     | 10.95138800 |
| C                 | 1.43712400  | 9.86729000     | 9.65241700  |
| H                 | -0.20052100 | 10.73924000    | 12.03408100 |
| H                 | 1.50308000  | 10.99816300    | 12.48689900 |
| H                 | -1.12900900 | 8.65216400     | 10.66040500 |
| H                 | -0.57256200 | 7.46031800     | 11.87237500 |
| H                 | 1.60521500  | 9.17079500     | 8.82402100  |
| H                 | 2.31162200  | 10.52378100    | 9.72105600  |
| P                 | 4.69473000  | 9.01283400     | 12.41539700 |
| P                 | 3.87791600  | 6.22789200     | 10.11080600 |
| C                 | 5.18975900  | 10.40823500    | 11.30993800 |
| C                 | 6.32322800  | 8.24707400     | 12.82857400 |
| C                 | 4.29040500  | 9.88914300     | 13.98952400 |
| C                 | 3.85611800  | 6.93305800     | 8.39969400  |
| C                 | 5.61548900  | 5.60194400     | 10.20979500 |
| C                 | 2.93378000  | 4.65832100     | 9.87645600  |
| H                 | 5.99141400  | 11.01175800    | 11.75214900 |
| H                 | 4.32400600  | 11.05260800    | 11.12227000 |
| H                 | 7.00328700  | 8.96836300     | 13.29741600 |
| H                 | 6.79269500  | 7.85599200     | 11.92056800 |
| H                 | 4.08020700  | 9.14482000     | 14.76482500 |
| H                 | 3.39004000  | 10.49700100    | 13.85278900 |
| H                 | 4.43130600  | 7.86548100     | 8.37817100  |
| H                 | 2.82389300  | 7.16564700     | 8.11611800  |
| H                 | 6.31260900  | 6.44377200     | 10.14364900 |
| H                 | 5.83757700  | 4.89632600     | 9.39968500  |
| H                 | 2.96854100  | 4.08178800     | 10.80615900 |
| H                 | 3.33826000  | 4.05644300     | 9.05377700  |
| H                 | 0.52646300  | 9.81292300     | 13.37745100 |
| H                 | -0.15283200 | 7.23965100     | 10.16647900 |
| H                 | 0.54932600  | 10.47422600    | 9.43620700  |
| H                 | 4.27697300  | 6.23664600     | 7.66368600  |
| H                 | 5.77052200  | 5.10305800     | 11.17251700 |
| H                 | 1.88442800  | 4.89440100     | 9.66881100  |
| H                 | 5.11394400  | 10.53360200    | 14.31962900 |
| H                 | 5.53176100  | 10.00999600    | 10.34822900 |
| H                 | 6.15886600  | 7.40893700     | 13.51435400 |
| Br                | 2.16865300  | 6.00315200     | 13.55847300 |

**6-Cl-PMe<sub>3</sub>**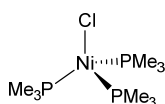

|                   |             |                |             |
|-------------------|-------------|----------------|-------------|
| E                 | =           | -2013.24570877 |             |
| G <sub>corr</sub> | =           | 0.288220       |             |
| Ni                | 3.13193200  | 7.56706800     | 11.78039300 |
| P                 | 1.39241000  | 8.89649000     | 11.06173500 |
| C                 | 0.91569400  | 10.26053500    | 12.21291300 |
| C                 | -0.20563000 | 7.99951200     | 10.83466200 |
| C                 | 1.56338700  | 9.80056800     | 9.46056100  |
| H                 | 0.01767500  | 10.78848200    | 11.87044400 |
| H                 | 1.74179900  | 10.97619500    | 12.28550900 |
| H                 | -1.02067300 | 8.67595700     | 10.55071700 |
| H                 | -0.46854600 | 7.49247600     | 11.76949400 |
| H                 | 1.63355700  | 9.08155800     | 8.63873500  |
| H                 | 2.48697200  | 10.38948600    | 9.47418800  |
| P                 | 4.64697400  | 9.06403100     | 12.63199100 |
| P                 | 3.69287900  | 6.21567100     | 10.00838200 |
| C                 | 5.13628800  | 10.51214700    | 11.59046400 |
| C                 | 6.27965600  | 8.28483100     | 13.00422700 |
| C                 | 4.25553800  | 9.88272600     | 14.24367100 |
| C                 | 3.47508900  | 6.80296500     | 8.26818500  |
| C                 | 5.49320600  | 5.79245600     | 10.03306000 |
| C                 | 2.92526000  | 4.53645200     | 9.92720000  |
| H                 | 5.92939100  | 11.10670100    | 12.06012000 |
| H                 | 4.26603900  | 11.15702500    | 11.42490400 |
| H                 | 6.97713600  | 8.99130500     | 13.47024000 |
| H                 | 6.72423600  | 7.90224600     | 12.07950100 |
| H                 | 4.04560800  | 9.11184800     | 14.99270000 |
| H                 | 3.35726500  | 10.49937500    | 14.13232600 |
| H                 | 3.94183800  | 7.78698300     | 8.14992400  |
| H                 | 2.40666000  | 6.90161000     | 8.04714800  |
| H                 | 6.08352800  | 6.70420400     | 9.89196600  |
| H                 | 5.75566500  | 5.07245500     | 9.24812500  |
| H                 | 3.09691300  | 4.02097700     | 10.87752200 |
| H                 | 3.33908600  | 3.93654300     | 9.10751300  |
| H                 | 0.73204800  | 9.84483800     | 13.20932400 |
| H                 | -0.08544600 | 7.23548700     | 10.05867600 |
| H                 | 0.71301400  | 10.46817600    | 9.27756300  |
| H                 | 3.91887800  | 6.10725300     | 7.54562600  |
| H                 | 5.74667400  | 5.36740100     | 11.00989900 |
| H                 | 1.84292100  | 4.63718300     | 9.78877000  |
| H                 | 5.08143400  | 10.51256400    | 14.59650200 |
| H                 | 5.48712100  | 10.15781700    | 10.61465400 |
| H                 | 6.11816500  | 7.43771600     | 13.67900700 |
| Cl                | 3.04333600  | 5.96742800     | 13.55335800 |

**7-I-PMe<sub>3</sub>**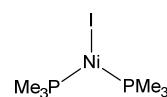

|                   |             |               |             |
|-------------------|-------------|---------------|-------------|
| E                 | =           | -1103.2070108 |             |
| G <sub>corr</sub> | =           | 0.179439      |             |
| Ni                | 2.97694000  | 7.32161000    | 11.59716800 |
| P                 | 1.73021300  | 9.18358400    | 11.27788600 |
| P                 | 2.70143200  | 6.70177000    | 13.75815800 |
| C                 | 1.70482100  | 10.41968700   | 12.64600500 |
| C                 | -0.06337500 | 8.85994600    | 10.99769100 |
| C                 | 2.19514000  | 10.20294200   | 9.81453500  |
| C                 | 3.65263600  | 7.70893400    | 14.97502300 |
| C                 | 0.98472800  | 6.78048000    | 14.42808800 |
| C                 | 3.21436900  | 4.97799400    | 14.16182700 |
| H                 | 1.07966700  | 11.28397700   | 12.39281700 |
| H                 | 2.72509900  | 10.76340100   | 12.84689300 |
| H                 | -0.62405900 | 9.79195600    | 10.86137400 |
| H                 | -0.47347300 | 8.31492500    | 11.85440400 |
| H                 | 2.13865400  | 9.58357700    | 8.91309500  |
| H                 | 3.22875700  | 10.54772200   | 9.92509800  |
| H                 | 3.32940300  | 8.75349700    | 14.91538100 |
| H                 | 4.71855300  | 7.66652200    | 14.72699200 |
| H                 | 0.61255400  | 7.80871700    | 14.36719700 |
| H                 | 0.95020100  | 6.44977000    | 15.47257900 |
| H                 | 2.62461700  | 4.27620500    | 13.56246900 |
| H                 | 3.07226000  | 4.75373200    | 15.22547000 |
| H                 | 1.31206900  | 9.95248300    | 13.55527300 |
| H                 | -0.18205900 | 8.23511300    | 10.10619900 |
| H                 | 1.53561000  | 11.07105500   | 9.69924500  |
| H                 | 4.26945600  | 4.84342600    | 13.90105200 |
| H                 | 0.32944100  | 6.14002000    | 13.82804800 |
| H                 | 3.50701300  | 7.34509900    | 15.99878000 |
| I                 | 4.39144600  | 6.13458900    | 9.80203900  |

**7-Br-PMe<sub>3</sub>**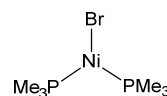

|                   |             |              |             |
|-------------------|-------------|--------------|-------------|
| E                 | =           | -1104.992075 |             |
| G <sub>corr</sub> | =           | 0.179718     |             |
| Ni                | 3.06750900  | 7.33061100   | 11.59571600 |
| P                 | 1.74691600  | 9.13568400   | 11.25518400 |
| P                 | 2.71524600  | 6.74593800   | 13.75887300 |
| C                 | 1.74732400  | 10.42266800  | 12.57785300 |
| C                 | -0.04991700 | 8.75641800   | 11.07634700 |
| C                 | 2.09770600  | 10.12367900  | 9.73841800  |
| C                 | 3.61912600  | 7.78251000   | 14.98855800 |
| C                 | 0.97869700  | 6.82627000   | 14.37854000 |
| C                 | 3.22139600  | 5.03455200   | 14.22185100 |
| H                 | 1.09164700  | 11.26209700  | 12.31807200 |
| H                 | 2.76615200  | 10.79705000  | 12.72400900 |

|    |             |             |             |
|----|-------------|-------------|-------------|
| H  | -0.63894700 | 9.66859100  | 10.92555600 |
| H  | -0.40746900 | 8.24202200  | 11.97458600 |
| H  | 2.00818700  | 9.47756100  | 8.85860400  |
| H  | 3.12519500  | 10.50112900 | 9.78008200  |
| H  | 3.30674200  | 8.82693100  | 14.88426500 |
| H  | 4.69483900  | 7.72734000  | 14.78979100 |
| H  | 0.60383200  | 7.85200200  | 14.29823900 |
| H  | 0.91473000  | 6.50504100  | 15.42473400 |
| H  | 2.65338700  | 4.31490100  | 13.62245200 |
| H  | 3.04688500  | 4.83554700  | 15.28569700 |
| H  | 1.40338200  | 9.98270000  | 13.51978600 |
| H  | -0.19563400 | 8.08955500  | 10.21980800 |
| H  | 1.40658800  | 10.96868500 | 9.63695700  |
| H  | 4.28453600  | 4.89796700  | 13.99716200 |
| H  | 0.34253200  | 6.17763100  | 13.76685600 |
| H  | 3.42509900  | 7.45088900  | 16.01528300 |
| Br | 4.53599100  | 6.21555900  | 10.09098800 |

### 7-Cl-PMe<sub>3</sub>

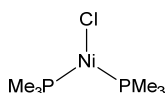

|                   |             |                |             |
|-------------------|-------------|----------------|-------------|
| E                 | =           | -1552.04429788 |             |
| G <sub>corr</sub> | =           | 0.182396       |             |
| Ni                | 3.06690600  | 7.31937300     | 11.59599400 |
| P                 | 1.74836800  | 9.13061000     | 11.26473000 |
| P                 | 2.71674300  | 6.73966600     | 13.75863800 |
| C                 | 1.75110000  | 10.42370600    | 12.58137900 |
| C                 | -0.04942500 | 8.75621200     | 11.08430600 |
| C                 | 2.10425400  | 10.11132300    | 9.74422700  |
| C                 | 3.61372800  | 7.78534000     | 14.98584800 |
| C                 | 0.97752200  | 6.82259700     | 14.37053800 |
| C                 | 3.22257200  | 5.03196700     | 14.23742400 |
| H                 | 1.09763500  | 11.26343500    | 12.31708900 |
| H                 | 2.77060800  | 10.79661300    | 12.72617400 |
| H                 | -0.63554900 | 9.66943900     | 10.92877800 |
| H                 | -0.41092700 | 8.24613200     | 11.98340600 |
| H                 | 2.01797900  | 9.46003300     | 8.86785500  |
| H                 | 3.13183700  | 10.48837100    | 9.78745900  |
| H                 | 3.30995100  | 8.83052900     | 14.86563400 |
| H                 | 4.69117300  | 7.72105900     | 14.79995800 |
| H                 | 0.60416200  | 7.84876200     | 14.28846800 |
| H                 | 0.90943800  | 6.50226200     | 15.41673000 |
| H                 | 2.65683600  | 4.30686900     | 13.64236600 |
| H                 | 3.04474700  | 4.84114800     | 15.30220000 |
| H                 | 1.40565700  | 9.98978900     | 13.52562700 |
| H                 | -0.19540500 | 8.08665500     | 10.22995400 |
| H                 | 1.41414600  | 10.95618100    | 9.63525300  |
| H                 | 4.28681600  | 4.89428500     | 14.01789200 |
| H                 | 0.34264000  | 6.17451400     | 13.75709700 |
| H                 | 3.40581100  | 7.46753900     | 16.01420800 |
| Cl                | 4.40937900  | 6.34932800     | 10.08462500 |

### 8-Br-PMe<sub>3</sub>

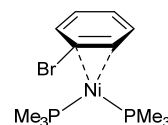

|                   |             |                |             |
|-------------------|-------------|----------------|-------------|
| E                 | =           | -1336.64535174 |             |
| G <sub>corr</sub> | =           | 0.267601       |             |
| Ni                | -2.51527500 | 1.80090200     | -0.03276900 |
| P                 | -4.38851900 | 1.48763400     | -1.18364500 |
| C                 | -5.42814700 | 0.19073800     | -0.37829600 |
| C                 | -4.42043900 | 0.95404800     | -2.95305400 |
| C                 | -5.53034900 | 2.93934200     | -1.21686000 |
| H                 | -6.41317600 | 0.10190500     | -0.85156400 |
| H                 | -5.55218000 | 0.44260700     | 0.68028500  |
| H                 | -5.44824200 | 0.86884900     | -3.32584000 |
| H                 | -3.92640700 | -0.01728000    | -3.05528200 |
| H                 | -5.04366800 | 3.77575200     | -1.73080100 |
| H                 | -5.74682800 | 3.24839400     | -0.18913800 |
| P                 | -0.74211000 | 1.01423100     | -1.07728500 |
| C                 | 0.28074000  | 2.30221200     | -1.91782500 |
| C                 | 0.50677000  | 0.16478500     | -0.01508200 |
| C                 | -0.97523200 | -0.22175500    | -2.43164100 |
| H                 | 0.59936000  | 3.04152600     | -1.17650700 |
| H                 | -0.32606200 | 2.81174100     | -2.67435900 |
| H                 | 0.84549400  | 0.85788600     | 0.76098000  |
| H                 | 1.37125500  | -0.16925600    | -0.60104700 |
| H                 | -1.55022300 | 0.23092300     | -3.24509000 |
| H                 | -1.53560100 | -1.08148600    | -2.04845000 |
| H                 | -4.91174100 | -0.77349200    | -0.43968200 |
| H                 | -3.88047200 | 1.68260200     | -3.56781700 |
| H                 | -6.47074300 | 2.70394900     | -1.72917700 |
| H                 | 1.16291800  | 1.86504700     | -2.40074200 |
| H                 | 0.04842400  | -0.70315200    | 0.47080400  |
| H                 | -0.01359900 | -0.57019400    | -2.82716000 |
| C                 | -1.89536400 | 2.30945900     | 1.70060600  |
| C                 | -3.20549600 | 2.91896000     | 1.56358300  |
| C                 | -4.27868400 | 2.46159500     | 2.39853800  |
| C                 | -4.11752400 | 1.38229200     | 3.23408300  |
| C                 | -2.84792000 | 0.73501200     | 3.31437900  |
| C                 | -1.76043100 | 1.20286900     | 2.61272000  |
| H                 | -3.29064200 | 3.91571200     | 1.13276200  |
| H                 | -5.22225000 | 3.00345500     | 2.37495700  |
| H                 | -4.93930000 | 1.03241300     | 3.85335300  |
| H                 | -2.72962000 | -0.13192800    | 3.96092500  |
| H                 | -0.78725900 | 0.73589600     | 2.72885000  |
| Br                | -0.24806100 | 3.61851900     | 1.78727200  |

**8-Cl-PMe<sub>3</sub>**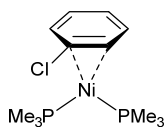

|                   |   |                                     |
|-------------------|---|-------------------------------------|
| E                 | = | -1783.69729748                      |
| G <sub>corr</sub> | = | 0.268563                            |
| Ni                |   | -0.77264000 0.67024800 -0.11353400  |
| P                 |   | -2.62002100 0.41448600 -1.30633200  |
| C                 |   | -3.85748200 -0.68813000 -0.48957900 |
| C                 |   | -2.60606000 -0.27437400 -3.02303900 |
| C                 |   | -3.59831700 1.96390000 -1.55118500  |
| H                 |   | -4.81212500 -0.69266500 -1.02898500 |
| H                 |   | -4.01944000 -0.34904800 0.53838900  |
| H                 |   | -3.61853000 -0.32332700 -3.44209400 |
| H                 |   | -2.18007700 -1.28272300 -3.01082600 |
| H                 |   | -2.99298100 2.69954900 -2.09219100  |
| H                 |   | -3.85641200 2.38761000 -0.57498400  |
| P                 |   | 1.03005200 -0.04754100 -1.15728700  |
| C                 |   | 1.98296500 1.30675800 -1.97944100   |
| C                 |   | 2.33378800 -0.84511100 -0.11922200  |
| C                 |   | 0.86900000 -1.26924700 -2.53617800  |
| H                 |   | 2.25451000 2.05616400 -1.22951300   |
| H                 |   | 1.35156300 1.78860200 -2.73419800   |
| H                 |   | 2.65430300 -0.14217600 0.65568100   |
| H                 |   | 3.20288000 -1.13792300 -0.72039500  |
| H                 |   | 0.25954100 -0.84058000 -3.33749500  |
| H                 |   | 0.36964100 -2.17283900 -2.16964600  |
| H                 |   | -3.46427800 -1.71004700 -0.45014100 |
| H                 |   | -1.98564300 0.35603700 -3.66933000  |
| H                 |   | -4.51969000 1.77559000 -2.11529400  |
| H                 |   | 2.89234300 0.92832900 -2.46195400   |
| H                 |   | 1.92253600 -1.73473500 0.36951400   |
| H                 |   | 1.84848600 -1.54580500 -2.94432900  |
| C                 |   | -0.11382200 1.21953900 1.61916100   |
| C                 |   | -1.46586700 1.74168200 1.49147700   |
| C                 |   | -2.49964500 1.19115500 2.32480200   |
| C                 |   | -2.26171000 0.10997300 3.13673200   |
| C                 |   | -0.94586700 -0.44362300 3.21152500  |
| C                 |   | 0.10363200 0.11840500 2.52555900    |
| H                 |   | -1.61106800 2.74967900 1.10419300   |
| H                 |   | -3.47989100 1.66371800 2.31171400   |
| H                 |   | -3.05641900 -0.31055300 3.74741200  |
| H                 |   | -0.76369300 -1.30599900 3.84910900  |
| H                 |   | 1.11229600 -0.26592100 2.64325800   |
| Cl                |   | 1.29374000 2.45807500 1.59130600    |

**TS-8-9-Br-PMe<sub>3</sub>**

|                   |   |                                   |
|-------------------|---|-----------------------------------|
| E                 | = | -1336.64193985                    |
| G <sub>corr</sub> | = | 0.268325                          |
| v                 | = | -85.30 cm <sup>-1</sup>           |
| Ni                |   | -2.60106300 1.65679100 0.00721300 |

|    |  |                                     |
|----|--|-------------------------------------|
| P  |  | -4.43035800 1.38936200 -1.25685000  |
| C  |  | -5.67221000 0.32762000 -0.40282800  |
| C  |  | -4.41498800 0.68646800 -2.96083100  |
| C  |  | -5.34476000 2.97279200 -1.49828700  |
| H  |  | -6.62787000 0.31574300 -0.93969400  |
| H  |  | -5.82724300 0.70560800 0.61310700   |
| H  |  | -5.42976200 0.64071500 -3.37322800  |
| H  |  | -3.99472300 -0.32379600 -2.94164500 |
| H  |  | -4.72600500 3.66909800 -2.07467900  |
| H  |  | -5.55127000 3.42468200 -0.52272900  |
| P  |  | -0.79349100 1.05740800 -1.08144400  |
| C  |  | 0.09006700 2.48410400 -1.83706700   |
| C  |  | 0.49552800 0.26730800 -0.03497900   |
| C  |  | -0.94246200 -0.12575500 -2.48744000 |
| H  |  | 0.32035600 3.20423200 -1.04622900   |
| H  |  | -0.55868300 2.96591800 -2.57671800  |
| H  |  | 0.75004800 0.95431600 0.77722100    |
| H  |  | 1.39427800 0.04030800 -0.61995700   |
| H  |  | -1.55800300 0.31103100 -3.27890800  |
| H  |  | -1.42172200 -1.04826700 -2.14277300 |
| H  |  | -5.28819200 -0.69581500 -0.33083700 |
| H  |  | -3.79535600 1.31120700 -3.61263500  |
| H  |  | -6.29011900 2.81036300 -2.02875400  |
| H  |  | 1.01741600 2.16198800 -2.32530800   |
| H  |  | 0.10302600 -0.66114000 0.39283400   |
| H  |  | 0.04413900 -0.37003500 -2.89799200  |
| C  |  | -2.05804200 2.02438900 1.71394600   |
| C  |  | -3.29554500 2.74234100 1.69264100   |
| C  |  | -4.30822000 2.40404500 2.63487700   |
| C  |  | -4.12055200 1.35653700 3.51744900   |
| C  |  | -2.89924300 0.63829800 3.51313500   |
| C  |  | -1.86780200 0.98055500 2.65368600   |
| H  |  | -3.37806200 3.69102400 1.16416100   |
| H  |  | -5.21167500 3.00854600 2.68189900   |
| H  |  | -4.89704300 1.09177600 4.23012300   |
| H  |  | -2.76978600 -0.20198800 4.19198100  |
| H  |  | -0.92739600 0.43926400 2.67196600   |
| Br |  | -0.07981500 3.56567100 1.89055600   |

**TS-8-9-Cl-PMe<sub>3</sub>**

|                   |   |                                     |
|-------------------|---|-------------------------------------|
| E                 | = | -1783.69289962                      |
| G <sub>corr</sub> | = | 0.269087                            |
| v                 | = | -104.13 cm <sup>-1</sup>            |
| Ni                |   | -0.80924900 0.56031400 -0.12550700  |
| P                 |   | -2.62462800 0.31269600 -1.41950500  |
| C                 |   | -3.87651500 -0.74462300 -0.57466800 |
| C                 |   | -2.59668600 -0.38744400 -3.12368600 |
| C                 |   | -3.52644800 1.90271600 -1.66166200  |
| H                 |   | -4.82870800 -0.75306200 -1.11777200 |
| H                 |   | -4.03689400 -0.36607800 0.44028600  |
| H                 |   | -3.60905400 -0.43552300 -3.54164000 |
| H                 |   | -2.17372500 -1.39652500 -3.10276600 |
| H                 |   | -2.89955300 2.59644500 -2.23223200  |

|    |             |             |             |
|----|-------------|-------------|-------------|
| H  | -3.73523500 | 2.35284500  | -0.68570900 |
| P  | 1.01236900  | -0.01240000 | -1.19417700 |
| C  | 1.88322300  | 1.43784500  | -1.91600300 |
| C  | 2.29460600  | -0.80464900 | -0.14344800 |
| C  | 0.88123500  | -1.17463300 | -2.61848000 |
| H  | 2.09870700  | 2.14004200  | -1.10542100 |
| H  | 1.23283200  | 1.92717600  | -2.64912600 |
| H  | 2.54061600  | -0.11599400 | 0.66969900  |
| H  | 3.19637700  | -1.02920100 | -0.72468500 |
| H  | 0.26698400  | -0.73054600 | -3.40681800 |
| H  | 0.40886000  | -2.10731100 | -2.29229400 |
| H  | -3.49610100 | -1.76919200 | -0.50014600 |
| H  | -1.97534700 | 0.23979600  | -3.77135500 |
| H  | -4.46998900 | 1.74813900  | -2.19765000 |
| H  | 2.81651300  | 1.13513000  | -2.40511100 |
| H  | 1.90088700  | -1.73443700 | 0.28017100  |
| H  | 1.87296300  | -1.40251600 | -3.02621100 |
| C  | -0.26389700 | 0.89777900  | 1.57388900  |
| C  | -1.48043000 | 1.64497900  | 1.58429900  |
| C  | -2.46202600 | 1.35060100  | 2.57063200  |
| C  | -2.25290000 | 0.32877100  | 3.47975100  |
| C  | -1.04186200 | -0.40352200 | 3.45485700  |
| C  | -0.04191400 | -0.10999700 | 2.54017200  |
| H  | -1.57265600 | 2.57271800  | 1.02021100  |
| H  | -3.35556200 | 1.96828700  | 2.63128500  |
| H  | -3.00507000 | 0.09778900  | 4.22923400  |
| H  | -0.89647800 | -1.22104300 | 4.15783900  |
| H  | 0.88930700  | -0.66726300 | 2.53491200  |
| Cl | 1.67504400  | 2.36902100  | 1.66149600  |

### 9-I-PMe<sub>3</sub>

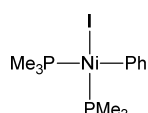

$$E = -1334.70742817$$

$$G_{\text{corr}} = 0.268779$$

|    |             |            |            |
|----|-------------|------------|------------|
| Ni | 2.37440000  | 3.95863200 | 5.57007600 |
| P  | 1.01244700  | 5.02022200 | 4.03544600 |
| C  | 0.13548000  | 6.39191800 | 4.90358800 |
| C  | -0.34992600 | 4.06672700 | 3.24739600 |
| C  | 1.71661700  | 5.93965900 | 2.59506000 |
| H  | -0.47430500 | 6.96501300 | 4.19612800 |
| H  | 0.87311500  | 7.05837400 | 5.36408400 |
| H  | -0.98519700 | 4.72020300 | 2.63856400 |
| H  | -0.95502500 | 3.58966100 | 4.02361100 |
| H  | 2.00331700  | 5.25135900 | 1.79738800 |
| H  | 2.59675300  | 6.51204500 | 2.90619900 |
| P  | 4.10747000  | 3.35992700 | 4.35495700 |
| C  | 3.95981600  | 3.41180600 | 2.51789900 |
| C  | 5.72806700  | 4.18411300 | 4.62391500 |
| C  | 4.46099000  | 1.57603100 | 4.63198100 |
| H  | 4.02651100  | 4.44136800 | 2.16033500 |
| H  | 3.00530800  | 2.97906600 | 2.20368500 |

|   |             |            |             |
|---|-------------|------------|-------------|
| H | 5.63172100  | 5.25719500 | 4.42790800  |
| H | 6.47646000  | 3.76275800 | 3.94347900  |
| H | 4.82627900  | 1.42293400 | 5.64899000  |
| H | 5.21243100  | 1.22333900 | 3.91729300  |
| H | -0.50247200 | 5.98773800 | 5.69272000  |
| H | 0.07494800  | 3.28474900 | 2.60871700  |
| H | 0.96615400  | 6.63378100 | 2.20016500  |
| H | 4.77631600  | 2.83345100 | 2.07112500  |
| H | 6.05335200  | 4.04509100 | 5.65695400  |
| H | 3.53901100  | 1.00006200 | 4.50172000  |
| C | 3.54282700  | 3.67092200 | 7.05768900  |
| C | 3.74568300  | 2.49242100 | 7.79311500  |
| C | 4.53579300  | 2.48287000 | 8.94715900  |
| C | 5.13508200  | 3.66278200 | 9.40098800  |
| C | 4.94125100  | 4.84782500 | 8.68616900  |
| C | 4.16416300  | 4.84416500 | 7.52089500  |
| H | 3.26352900  | 1.57227600 | 7.47281100  |
| H | 4.67414000  | 1.55561800 | 9.49972900  |
| H | 5.74449000  | 3.65805600 | 10.30149400 |
| H | 5.40176900  | 5.77283800 | 9.02759100  |
| H | 4.04627800  | 5.77341900 | 6.96355900  |
| I | 0.27331600  | 3.31344500 | 7.08271300  |

### 9-Br-PMe<sub>3</sub>

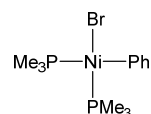

$$E = -1336.69800763$$

$$G_{\text{corr}} = 0.271175$$

|    |             |             |             |
|----|-------------|-------------|-------------|
| Ni | -3.52707500 | 1.70041900  | 0.12845700  |
| P  | -4.53274900 | 1.68518200  | -1.96134900 |
| C  | -6.32780600 | 1.27132300  | -1.93998200 |
| C  | -3.96597700 | 0.51692500  | -3.27871500 |
| C  | -4.49898100 | 3.32033400  | -2.80758700 |
| H  | -6.72635800 | 1.26545000  | -2.96082100 |
| H  | -6.86607800 | 2.00207000  | -1.33354800 |
| H  | -4.55048300 | 0.67072000  | -4.19293900 |
| H  | -4.12263800 | -0.51060100 | -2.93353700 |
| H  | -3.46455100 | 3.60310800  | -3.02845100 |
| H  | -4.92536800 | 4.07113300  | -2.13466300 |
| P  | -1.48573000 | 1.23291500  | -0.55457100 |
| C  | -0.92567800 | 2.24031900  | -1.99401000 |
| C  | -0.07656800 | 1.49765000  | 0.59744200  |
| C  | -1.24035400 | -0.51828400 | -1.05826300 |
| H  | -0.92212700 | 3.29479100  | -1.69811700 |
| H  | -1.58704500 | 2.12698500  | -2.85424500 |
| H  | -0.08743300 | 2.52704600  | 0.96616000  |
| H  | 0.86494700  | 1.31035100  | 0.06883000  |
| H  | -1.94179400 | -0.79260700 | -1.84966400 |
| H  | -1.42887200 | -1.15790900 | -0.18974300 |
| H  | -6.46977700 | 0.28261300  | -1.49088100 |
| H  | -2.90695000 | 0.64543500  | -3.51482900 |
| H  | -5.07397000 | 3.30019100  | -3.74038400 |



|    |             |             |             |
|----|-------------|-------------|-------------|
| H  | 0.09047200  | 1.95098500  | -2.28487300 |
| H  | -0.15631500 | 0.82236800  | 1.45203100  |
| H  | -0.21468400 | -0.68257500 | -1.40693500 |
| C  | -2.86027200 | 1.38547500  | 1.88710500  |
| C  | -2.42448100 | 2.38335800  | 2.77399600  |
| C  | -1.99047800 | 2.06959500  | 4.06501500  |
| C  | -1.98751600 | 0.74050000  | 4.50530300  |
| C  | -2.42208600 | -0.26661800 | 3.63999300  |
| C  | -2.84608400 | 0.05664800  | 2.34376700  |
| H  | -2.43524700 | 3.42245900  | 2.45338300  |
| H  | -1.65832100 | 2.86267500  | 4.73269400  |
| H  | -1.65129800 | 0.49487100  | 5.50991700  |
| H  | -2.42715300 | -1.30415300 | 3.96929700  |
| H  | -3.16539300 | -0.74504200 | 1.67834600  |
| Br | -5.46833100 | 2.83660700  | 1.08135400  |

### 9-Cl-PMe<sub>3</sub>

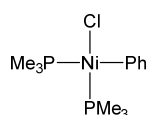

|                   |             |                |             |
|-------------------|-------------|----------------|-------------|
| E                 | =           | -1783.75121852 |             |
| G <sub>corr</sub> | =           | 0.270617       |             |
| Ni                | -1.66158000 | 0.51749800     | -0.01575800 |
| P                 | -2.30701100 | 1.54735800     | -2.00573100 |
| C                 | -4.08047500 | 1.31200400     | -2.44171000 |
| C                 | -1.52814700 | 1.35978300     | -3.67301600 |
| C                 | -2.15312400 | 3.36519500     | -1.74458700 |
| H                 | -4.36201600 | 1.95000900     | -3.28712100 |
| H                 | -4.69830600 | 1.55097700     | -1.57331700 |
| H                 | -1.93007300 | 2.12187500     | -4.35053200 |
| H                 | -1.76065200 | 0.37627600     | -4.09193800 |
| H                 | -1.09764900 | 3.62182300     | -1.60012600 |
| H                 | -2.70278700 | 3.64094400     | -0.84116300 |
| P                 | 0.06814000  | -0.59646800    | -0.78501100 |
| C                 | -0.25808500 | -1.67144600    | -2.24476100 |
| C                 | 1.41503500  | 0.53898200     | -1.31709500 |
| C                 | 0.97016900  | -1.77457600    | 0.30184400  |
| H                 | -0.64348800 | -1.09464500    | -3.08592800 |
| H                 | -1.00441400 | -2.42349000    | -1.96741100 |
| H                 | 1.04172500  | 1.25541700     | -2.05261600 |
| H                 | 2.25247900  | -0.02224600    | -1.74669400 |
| H                 | 0.28983000  | -2.55781000    | 0.64690900  |
| H                 | 1.36588700  | -1.25486600    | 1.17708300  |
| H                 | -4.25032800 | 0.26394300     | -2.71238400 |
| H                 | -0.44204300 | 1.47641000     | -3.62466000 |
| H                 | -2.54500700 | 3.92261200     | -2.60290600 |
| H                 | 0.66335200  | -2.17943800    | -2.55081500 |
| H                 | 1.76743800  | 1.09601800     | -0.44257900 |
| H                 | 1.79359300  | -2.22822100    | -0.26072600 |
| C                 | -1.11421900 | -0.05512300    | 1.71575000  |
| C                 | -1.64229100 | -1.20161900    | 2.33062500  |
| C                 | -1.25877000 | -1.57575700    | 3.62297900  |
| C                 | -0.33041100 | -0.80674200    | 4.33251900  |

|    |             |             |            |
|----|-------------|-------------|------------|
| C  | 0.20438500  | 0.33980800  | 3.73776700 |
| C  | -0.18425200 | 0.70618000  | 2.44326900 |
| H  | -2.36473700 | -1.81380500 | 1.79358500 |
| H  | -1.68410200 | -2.46893400 | 4.07731500 |
| H  | -0.02854500 | -1.09726400 | 5.33606100 |
| H  | 0.92565100  | 0.94858100  | 4.28021200 |
| H  | 0.25068000  | 1.59778400  | 1.99309300 |
| Cl | -3.47625700 | 1.53010200  | 0.95223600 |

### TS-9-3-I-PMe<sub>3</sub>

|                   |             |                         |             |
|-------------------|-------------|-------------------------|-------------|
| E                 | =           | -1334.89533628          |             |
| G <sub>corr</sub> | =           | 0.265005                |             |
| V                 | =           | -88.03 cm <sup>-1</sup> |             |
| Ni                | -1.30498100 | 0.12127600              | 0.00974500  |
| P                 | -2.55981600 | 1.85759200              | -0.96668600 |
| C                 | -3.50474300 | 2.75682700              | 0.33863900  |
| C                 | -3.86857500 | 1.45652700              | -2.20150000 |
| C                 | -1.63704600 | 3.22647900              | -1.79412800 |
| H                 | -4.08081900 | 3.58892600              | -0.08302700 |
| H                 | -2.80818100 | 3.14409900              | 1.09010700  |
| H                 | -4.41774000 | 2.35269400              | -2.51393200 |
| H                 | -4.56679700 | 0.73834600              | -1.75962400 |
| H                 | -1.12426000 | 2.84186300              | -2.68257900 |
| H                 | -0.88343200 | 3.62882400              | -1.10828700 |
| P                 | 0.49890900  | -0.48730700             | -0.96608300 |
| C                 | -0.01624600 | -0.95849900             | -2.66636700 |
| C                 | 1.81787600  | 0.76136100              | -1.21863300 |
| C                 | 1.37052500  | -1.96769200             | -0.33022300 |
| H                 | -0.44193000 | -0.08849800             | -3.17569900 |
| H                 | -0.78242100 | -1.73703700             | -2.60445200 |
| H                 | 1.38624400  | 1.65414800              | -1.68237200 |
| H                 | 2.60357900  | 0.35953800              | -1.86796200 |
| H                 | 1.81275500  | -1.74305300             | 0.64412900  |
| H                 | 2.15689200  | -2.27781800             | -1.02707000 |
| H                 | -4.18707400 | 2.05746200              | 0.83295700  |
| H                 | -3.41409300 | 0.98891500              | -3.08171300 |
| H                 | -2.30803800 | 4.03867100              | -2.09876700 |
| H                 | 0.84195100  | -1.33018600             | -3.23813900 |
| H                 | 2.25033000  | 1.04067700              | -0.25413800 |
| H                 | 0.64828300  | -2.78085300             | -0.20896900 |
| C                 | -0.21023300 | 0.38033000              | 1.48376800  |
| C                 | -0.12258300 | -0.59811600             | 2.48617700  |
| C                 | 0.37255900  | -0.26586100             | 3.75185500  |
| C                 | 0.81192100  | 1.03529500              | 4.01787100  |
| C                 | 0.75835100  | 2.00583300              | 3.01269400  |
| C                 | 0.26516000  | 1.67560600              | 1.74506500  |
| H                 | -0.46111800 | -1.60940900             | 2.28111500  |
| H                 | 0.41706700  | -1.02564300             | 4.52901300  |
| H                 | 1.20103100  | 1.28940300              | 5.00058300  |
| H                 | 1.10710000  | 3.01703300              | 3.21063800  |
| H                 | 0.23973600  | 2.42962100              | 0.96181300  |
| I                 | -3.06747900 | -1.97892200             | 0.15291800  |

**TS-9-3-Br-PMe<sub>3</sub>**

|                   |             |                         |
|-------------------|-------------|-------------------------|
| E                 | =           | -1336.67631292          |
| G <sub>corr</sub> | =           | 0.267521                |
| v                 | =           | -84.67 cm <sup>-1</sup> |
| Ni                | 0.71481000  | 1.22553000 -0.03001400  |
| P                 | -0.48274500 | 3.04627000 -0.97831300  |
| C                 | -1.43605900 | 3.86803000 0.37238000   |
| C                 | -1.79203400 | 2.73018900 -2.23942500  |
| C                 | 0.43314200  | 4.47372200 -1.71463700  |
| H                 | -1.99258300 | 4.73828700 0.00432300   |
| H                 | -0.74611400 | 4.18705700 1.16113300   |
| H                 | -2.36664500 | 3.63650700 -2.46558400  |
| H                 | -2.46880000 | 1.95688300 -1.86152800  |
| H                 | 0.95310000  | 4.15027800 -2.62328100  |
| H                 | 1.18002400  | 4.83812400 -1.00043600  |
| P                 | 2.55352300  | 0.68320500 -0.99142800  |
| C                 | 2.07818300  | 0.17636500 -2.69552300  |
| C                 | 3.85228400  | 1.95522600 -1.24535800  |
| C                 | 3.46790400  | -0.76434000 -0.33444100 |
| H                 | 1.63524700  | 1.02841400 -3.22081700  |
| H                 | 1.33202600  | -0.62227400 -2.63956000 |
| H                 | 3.41084000  | 2.83675000 -1.72116700  |
| H                 | 4.65372200  | 1.56320600 -1.88157800  |
| H                 | 3.86903200  | -0.52168200 0.65353600  |
| H                 | 4.28885400  | -1.04096500 -1.00519500 |
| H                 | -2.13681500 | 3.14760800 0.80730900   |
| H                 | -1.33223900 | 2.35883500 -3.16211700  |
| H                 | -0.24207700 | 5.29949800 -1.97049200  |
| H                 | 2.95228900  | -0.17970200 -3.25290600 |
| H                 | 4.26977000  | 2.25072600 -0.27888100  |
| H                 | 2.77825400  | -1.60817000 -0.23344800 |
| C                 | 1.78582400  | 1.56724300 1.44928400   |
| C                 | 1.89417200  | 0.62190200 2.48113600   |
| C                 | 2.41474600  | 0.99301400 3.72550100   |
| C                 | 2.85479000  | 2.30303000 3.94479800   |
| C                 | 2.77585200  | 3.24220600 2.91225300   |
| C                 | 2.25860000  | 2.87139400 1.66522300   |
| H                 | 1.54544100  | -0.39262500 2.31388300  |
| H                 | 2.47598300  | 0.25731700 4.52466200   |
| H                 | 3.26216600  | 2.58759100 4.91169100   |
| H                 | 3.12375300  | 4.26058900 3.07196300   |
| H                 | 2.21411400  | 3.60036800 0.85929000   |
| Br                | -1.02463200 | -0.51900700 0.31646300  |

|    |             |                         |
|----|-------------|-------------------------|
| C  | -3.06930000 | 2.73735600 -2.13063400  |
| C  | -0.73396700 | 4.36403600 -1.77616600  |
| H  | -2.99353200 | 4.69559700 0.16325900   |
| H  | -1.66705800 | 4.07639600 1.18972200   |
| H  | -3.61427400 | 3.67491400 -2.29368500  |
| H  | -3.75377800 | 1.99244000 -1.71155100  |
| H  | -0.30145700 | 4.02943400 -2.72578300  |
| H  | 0.08218000  | 4.69493800 -1.12454700  |
| P  | 1.42783300  | 0.58471500 -1.01476000  |
| C  | 1.01142800  | 0.02274900 -2.71781500  |
| C  | 2.67583000  | 1.90731600 -1.26916000  |
| C  | 2.39569400  | -0.80108000 -0.30271100 |
| H  | 0.52911500  | 0.84145300 -3.26176600  |
| H  | 0.30915100  | -0.81494400 -2.65949700 |
| H  | 2.20776100  | 2.76421100 -1.76405500  |
| H  | 3.50144200  | 1.53853400 -1.88815600  |
| H  | 2.76119500  | -0.51452100 0.68758400  |
| H  | 3.24529300  | -1.05633600 -0.94580400 |
| H  | -3.12120500 | 3.09414500 0.94730000   |
| H  | -2.70771400 | 2.36253400 -3.09479200  |
| H  | -1.39559900 | 5.21675400 -1.97225700  |
| H  | 1.91154300  | -0.29267700 -3.25791200 |
| H  | 3.06925900  | 2.23205800 -0.30192300  |
| H  | 1.74445100  | -1.67410300 -0.19336700 |
| C  | 0.53808000  | 1.47616000 1.39532500   |
| C  | 0.61168700  | 0.54703000 2.44488500   |
| C  | 1.09468400  | 0.93620000 3.69919300   |
| C  | 1.53292000  | 2.24747900 3.91203700   |
| C  | 1.49146500  | 3.16910300 2.86180400   |
| C  | 1.00994900  | 2.78106400 1.60599400   |
| H  | 0.27003800  | -0.47133900 2.28502000  |
| H  | 1.12998800  | 0.21166100 4.50999600   |
| H  | 1.91073800  | 2.54603500 4.88664400   |
| H  | 1.83802400  | 4.18884900 3.01542500   |
| H  | 0.99451800  | 3.49789200 0.78876300   |
| Cl | -2.15901000 | -0.48711900 0.26577700  |

**TS-9-3-Cl-PMe<sub>3</sub>**

|                   |             |                         |
|-------------------|-------------|-------------------------|
| E                 | =           | -1783.72865959          |
| G <sub>corr</sub> | =           | 0.268487                |
| v                 | =           | -88.55 cm <sup>-1</sup> |
| Ni                | -0.46345900 | 1.07262600 -0.11445600  |
| P                 | -1.64277900 | 2.96437400 -0.98048100  |
| C                 | -2.43743500 | 3.79902700 0.46244500   |

## In Toluene

### Ni(PMe<sub>3</sub>)<sub>4</sub>

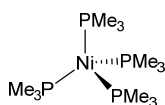

E = -2014.13708291

G<sub>corr</sub> = 0.403970

|    |             |             |             |
|----|-------------|-------------|-------------|
| Ni | 2.97381100  | 7.50344000  | 11.85409900 |
| P  | 1.37483900  | 8.84210700  | 11.13366300 |
| P  | 2.20722400  | 6.27725200  | 13.51149600 |
| C  | 0.88536800  | 10.24856200 | 12.25337300 |
| C  | -0.31697100 | 8.16396700  | 10.75098000 |
| C  | 1.64143500  | 9.81555100  | 9.56776600  |
| C  | 2.55556300  | 6.82503300  | 15.25803600 |
| C  | 0.36860200  | 6.01592500  | 13.67682000 |
| C  | 2.74379500  | 4.49927900  | 13.67361100 |
| H  | 0.05074000  | 10.83875800 | 11.85235300 |
| H  | 1.74639700  | 10.91117200 | 12.39388100 |
| H  | -0.99515300 | 8.92925400  | 10.35015700 |
| H  | -0.76077600 | 7.74282600  | 11.65808900 |
| H  | 1.69439100  | 9.13211500  | 8.71510100  |
| H  | 2.59567600  | 10.35007200 | 9.62535100  |
| H  | 2.18758700  | 7.84642100  | 15.40103200 |
| H  | 3.63692500  | 6.82627000  | 15.43416100 |
| H  | -0.12338400 | 6.97858500  | 13.85513400 |
| H  | 0.11669700  | 5.33787300  | 14.50319500 |
| H  | 2.36144500  | 3.92489400  | 12.82404700 |
| H  | 2.37823100  | 4.03591700  | 14.59981200 |
| P  | 4.57278300  | 8.84210700  | 12.57453600 |
| P  | 3.74039800  | 6.27725100  | 10.19670300 |
| C  | 5.06225400  | 10.24856200 | 11.45482600 |
| C  | 6.26459200  | 8.16396600  | 12.95721900 |
| C  | 4.30618600  | 9.81555100  | 14.14043300 |
| C  | 3.39205800  | 6.82503300  | 8.45016300  |
| C  | 5.57901900  | 6.01592500  | 10.03137800 |
| C  | 3.20382600  | 4.49927900  | 10.03458800 |
| H  | 5.89688200  | 10.83875700 | 11.85584600 |
| H  | 4.20122600  | 10.91117200 | 11.31431800 |
| H  | 6.94277500  | 8.92925400  | 13.35804300 |
| H  | 6.70839800  | 7.74282500  | 12.05011000 |
| H  | 4.25323000  | 9.13211500  | 14.99309800 |
| H  | 3.35194600  | 10.35007200 | 14.08284800 |
| H  | 3.76003400  | 7.84642100  | 8.30716700  |
| H  | 2.31069700  | 6.82627000  | 8.27403800  |
| H  | 6.07100500  | 6.97858500  | 9.85306500  |
| H  | 5.83092400  | 5.33787300  | 9.20500400  |
| H  | 3.58617600  | 3.92489400  | 10.88415200 |
| H  | 3.56939100  | 4.03591700  | 9.10838700  |
| H  | 0.60305900  | 9.85393000  | 13.23550800 |
| H  | -0.22469800 | 7.35334000  | 10.01912300 |
| H  | 0.83650600  | 10.53989700 | 9.38505300  |

|   |             |             |             |
|---|-------------|-------------|-------------|
| H | 3.86490100  | 6.17035700  | 7.70594000  |
| H | 5.97358000  | 5.60061000  | 10.96487800 |
| H | 2.10969600  | 4.44342100  | 10.05054800 |
| H | 3.83792600  | 4.44342100  | 13.65765100 |
| H | -0.02595900 | 5.60061000  | 12.74332100 |
| H | 2.08272000  | 6.17035800  | 16.00225900 |
| H | 5.11111600  | 10.53989700 | 14.32314600 |
| H | 5.34456300  | 9.85392900  | 10.47269100 |
| H | 6.17231900  | 7.35333900  | 13.68907600 |

### Ni(PMe<sub>3</sub>)<sub>3</sub>

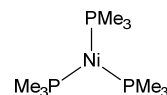

E = -1552.92426336

G<sub>corr</sub> = 0.294185

|    |             |             |             |
|----|-------------|-------------|-------------|
| Ni | -0.37837600 | 1.29416200  | -0.03109900 |
| P  | -1.59146500 | 2.98753900  | -0.59201400 |
| P  | -0.61818900 | 0.48827300  | 1.95583800  |
| C  | -1.65730000 | 4.43136800  | 0.58038000  |
| C  | -3.40670900 | 2.62804300  | -0.77096400 |
| C  | -1.29768300 | 3.90778500  | -2.18441500 |
| C  | 0.44962100  | 1.34553100  | 3.21291700  |
| C  | -2.25996400 | 0.56294700  | 2.83011800  |
| C  | -0.18076400 | -1.28545500 | 2.32129700  |
| H  | -2.32478500 | 5.22823500  | 0.22713300  |
| H  | -0.65035900 | 4.84505700  | 0.70753100  |
| H  | -3.98395600 | 3.52092500  | -1.04389700 |
| H  | -3.78933400 | 2.22797500  | 0.17437000  |
| H  | -1.37319200 | 3.20596000  | -3.02228600 |
| H  | -0.28166700 | 4.31859600  | -2.18123800 |
| H  | 0.18761500  | 2.40858700  | 3.24441100  |
| H  | 1.49972900  | 1.27013200  | 2.91047300  |
| H  | -2.59566300 | 1.60479000  | 2.88108800  |
| H  | -2.21362400 | 0.15511200  | 3.84879900  |
| H  | -0.81105800 | -1.94614300 | 1.71516300  |
| H  | -0.31398100 | -1.54403800 | 3.38037000  |
| P  | 1.12325800  | 0.41662900  | -1.30785200 |
| C  | 1.30644200  | 0.96266900  | -3.07865600 |
| C  | 2.87662000  | 0.64088600  | -0.73043800 |
| C  | 1.09510100  | -1.42544500 | -1.56013100 |
| H  | 1.50425300  | 2.04006300  | -3.09967900 |
| H  | 0.36415100  | 0.78646600  | -3.61020900 |
| H  | 3.09499200  | 1.71042600  | -0.63615900 |
| H  | 3.60360400  | 0.18967800  | -1.41805000 |
| H  | 1.15910700  | -1.92528600 | -0.58757800 |
| H  | 1.91848100  | -1.77372800 | -2.19737400 |
| H  | -2.00274300 | 4.08627900  | 1.56132700  |
| H  | -3.55380400 | 1.86238100  | -1.54075200 |
| H  | -2.00997800 | 4.72896700  | -2.34330400 |
| H  | 2.11528200  | 0.44143500  | -3.60851400 |
| H  | 2.99325500  | 0.18688600  | 0.25968000  |
| H  | 0.14457600  | -1.71537200 | -2.02228400 |

|   |             |             |            |
|---|-------------|-------------|------------|
| H | 0.86298900  | -1.46747800 | 2.04174300 |
| H | -3.00486100 | -0.00272300 | 2.25874800 |
| H | 0.33526600  | 0.91787100  | 4.21737200 |

### Ni(PMe<sub>3</sub>)<sub>2</sub>

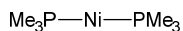

|                   |   |                                    |
|-------------------|---|------------------------------------|
| E                 | = | -1091.70878163                     |
| G <sub>corr</sub> | = | 0.186059                           |
| Ni                |   | 2.97653100 7.45427600 11.84232000  |
| P                 |   | 1.82795000 9.14246000 11.22109500  |
| P                 |   | 4.14393200 5.80034500 12.51666300  |
| C                 |   | 1.88573500 10.63545200 12.32156800 |
| C                 |   | -0.00517300 8.91423100 11.04646100 |
| C                 |   | 2.23965600 9.90648800 9.58127300   |
| C                 |   | 5.41142300 6.14879300 13.82612300  |
| C                 |   | 3.24381700 4.37090300 13.28343600  |
| C                 |   | 5.18372900 4.91534300 11.26115800  |
| H                 |   | 1.26234000 11.45165600 11.93504300 |
| H                 |   | 2.92012100 10.98512800 12.40776900 |
| H                 |   | -0.50279800 9.84149100 10.73504100 |
| H                 |   | -0.42457300 8.58604800 12.00350800 |
| H                 |   | 2.14014300 9.15418500 8.79142000   |
| H                 |   | 3.28041500 10.24787900 9.59046600  |
| H                 |   | 4.91633300 6.55807700 14.71323900  |
| H                 |   | 6.12009100 6.89925000 13.45983000  |
| H                 |   | 2.66092700 4.72481400 14.14044200  |
| H                 |   | 3.93479200 3.58754600 13.61952600  |
| H                 |   | 4.54196200 4.52317100 10.46499000  |
| H                 |   | 5.74499000 4.08580600 11.70958700  |
| H                 |   | 1.53836800 10.36244300 13.32377500 |
| H                 |   | -0.20799900 8.13331600 10.30567500 |
| H                 |   | 1.58494200 10.75684500 9.35259500  |
| H                 |   | 5.88904600 5.62001800 10.80771500  |
| H                 |   | 2.54610100 3.94431300 12.55477600  |
| H                 |   | 5.96277700 5.24313800 14.10964700  |

### PMe<sub>3</sub>

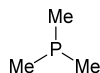

|                   |   |                                    |
|-------------------|---|------------------------------------|
| E                 | = | -461.172525307                     |
| G <sub>corr</sub> | = | 0.084469                           |
| P                 |   | 1.67484700 -0.11566400 -0.01330200 |
| C                 |   | 2.55783100 0.74151800 -1.41288500  |
| H                 |   | 2.39837900 0.18879300 -2.34593100  |
| H                 |   | 2.14845100 1.74901800 -1.54919800  |
| H                 |   | 3.63817000 0.82334900 -1.23581400  |
| C                 |   | 2.37136300 0.85366700 1.41672300   |
| H                 |   | 1.97765200 1.87654400 1.39773100   |
| H                 |   | 2.05965700 0.39537400 2.36235600   |
| H                 |   | 3.46792000 0.90020800 1.39517500   |
| C                 |   | 2.73439300 -1.64250600 0.11665500  |

|   |            |             |             |
|---|------------|-------------|-------------|
| H | 2.46666600 | -2.20518100 | 1.01842200  |
| H | 2.55297500 | -2.29344900 | -0.74633300 |
| H | 3.80560600 | -1.40598700 | 0.15666900  |

### PhI

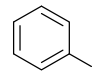

|                   |   |                                   |
|-------------------|---|-----------------------------------|
| E                 | = | -243.107411301                    |
| G <sub>corr</sub> | = | 0.058655                          |
| C                 |   | 2.37157500 -0.21732900 0.00004300 |
| C                 |   | 3.76822800 -0.23265400 0.00051000 |
| C                 |   | 4.45944700 0.98171500 -0.00005600 |
| C                 |   | 3.76393600 2.19238200 -0.00103400 |
| C                 |   | 2.36761900 2.19011800 -0.00148000 |
| C                 |   | 1.66000600 0.98489800 -0.00094800 |
| H                 |   | 4.31110600 -1.17155600 0.00129100 |
| H                 |   | 5.54623300 0.97381700 0.00029700  |
| H                 |   | 4.30742100 3.13298200 -0.00147600 |
| H                 |   | 1.81887400 3.12816300 -0.00226200 |
| H                 |   | 0.57508200 0.98662000 -0.00129100 |
| I                 |   | 1.31136300 -2.06288500 0.00090300 |

### Ph•

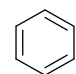

|                   |   |                                    |
|-------------------|---|------------------------------------|
| E                 | = | -231.634469524                     |
| G <sub>corr</sub> | = | 0.059636                           |
| C                 |   | 1.08903600 -0.03726000 0.00006800  |
| C                 |   | 2.48710300 -0.02944900 0.00046800  |
| C                 |   | 3.19309100 1.17730400 -0.00006300  |
| C                 |   | 2.50138000 2.40050800 -0.00093800  |
| C                 |   | 1.12511000 2.33023600 -0.00131100  |
| C                 |   | 0.37584200 1.17352000 -0.00088100  |
| H                 |   | 0.54732900 -0.98048800 0.00048500  |
| H                 |   | 3.03023100 -0.97063200 0.00119900  |
| H                 |   | 4.28086300 1.17485100 0.00024600   |
| H                 |   | 3.03752200 3.34612200 -0.00135700  |
| H                 |   | -0.71121200 1.18196800 -0.00119500 |

### Toluene

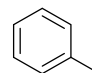

|                   |   |                                    |
|-------------------|---|------------------------------------|
| E                 | = | -271.655265649                     |
| G <sub>corr</sub> | = | 0.098610                           |
| C                 |   | 5.36852300 -0.42567700 0.02178100  |
| H                 |   | 4.47301500 -0.85535400 0.49141000  |
| H                 |   | 5.87686300 0.17269100 0.78652500   |
| H                 |   | 6.02627100 -1.25953500 -0.24677800 |

|   |            |             |             |
|---|------------|-------------|-------------|
| C | 5.00528800 | 0.40794500  | -1.18421600 |
| C | 4.60796100 | 1.74478800  | -1.03725900 |
| C | 5.03057800 | -0.13799500 | -2.47461600 |
| C | 4.24480600 | 2.51280100  | -2.14452200 |
| H | 4.58602300 | 2.18782400  | -0.04364900 |
| C | 4.66816900 | 0.62597900  | -3.58604900 |
| H | 5.33961500 | -1.17241400 | -2.60986700 |
| C | 4.27322300 | 1.95542100  | -3.42513600 |
| H | 3.94332800 | 3.54841800  | -2.00750700 |
| H | 4.69804800 | 0.18236500  | -4.57820700 |
| H | 3.99451800 | 2.55299600  | -4.28916600 |

### Toluene radical

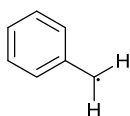

|                   |            |                |             |
|-------------------|------------|----------------|-------------|
| E                 | =          | -271.002248804 |             |
| G <sub>corr</sub> | =          | 0.085412       |             |
| C                 | 6.50908800 | 1.27618600     | -0.21000700 |
| H                 | 6.67673200 | 1.81105700     | 0.71994700  |
| H                 | 6.69715200 | 0.20676400     | -0.21611400 |
| C                 | 6.06368900 | 1.94410500     | -1.36490400 |
| C                 | 5.81901300 | 3.35063500     | -1.36239100 |
| C                 | 5.83781300 | 1.24266900     | -2.58778000 |
| C                 | 5.37988800 | 4.00260500     | -2.50438500 |
| H                 | 5.98439800 | 3.90922400     | -0.44413800 |
| C                 | 5.39869600 | 1.90613500     | -3.72307600 |
| H                 | 6.01733000 | 0.17054000     | -2.61621900 |
| C                 | 5.16527600 | 3.28938000     | -3.69350100 |
| H                 | 5.20012900 | 5.07449300     | -2.47747600 |
| H                 | 5.23410300 | 1.34969400     | -4.64248800 |
| H                 | 4.82056800 | 3.80490100     | -4.58553300 |

### H Abstraction TS: Ph• + Toluene

|                   |             |                           |             |
|-------------------|-------------|---------------------------|-------------|
| E                 | =           | -503.285594423            |             |
| G <sub>corr</sub> | =           | 0.170965                  |             |
| v                 | =           | -1107.17 cm <sup>-1</sup> |             |
| C                 | 0.48657400  | -0.67541400               | 0.05715700  |
| C                 | 1.87801500  | -0.62389000               | 0.22491400  |
| C                 | 2.62063300  | 0.06446100                | -0.72007300 |
| C                 | 2.06170500  | 0.70079100                | -1.81565800 |
| C                 | 0.66967500  | 0.64194600                | -1.97270200 |
| C                 | -0.11121200 | -0.04442600               | -1.03795100 |
| H                 | -0.12625600 | -1.20779900               | 0.78132700  |
| H                 | 2.35048400  | -1.11237100               | 1.07427100  |
| H                 | 2.68330000  | 1.23079800                | -2.53388300 |
| H                 | 0.19919300  | 1.13087700                | -2.82283500 |
| H                 | -1.19007900 | -0.08773700               | -1.16298900 |
| C                 | 5.34497900  | 0.34502300                | -0.68351400 |

|   |            |             |             |
|---|------------|-------------|-------------|
| H | 4.12462700 | 0.17578200  | -0.63411700 |
| H | 5.57819400 | 0.84416900  | 0.26109900  |
| H | 5.75058500 | -0.67043500 | -0.70122800 |
| C | 5.65257400 | 1.14709700  | -1.89141800 |
| C | 5.63552400 | 2.55332100  | -1.84745900 |
| C | 5.89697600 | 0.52463700  | -3.12910900 |
| C | 5.86516100 | 3.30919600  | -2.99612700 |
| H | 5.44017300 | 3.05209700  | -0.90071900 |
| C | 6.12706200 | 1.27939000  | -4.27842200 |
| H | 5.90665200 | -0.56165800 | -3.18358100 |
| C | 6.11232800 | 2.67569400  | -4.21740000 |
| H | 5.85249700 | 4.39477700  | -2.93889600 |
| H | 6.31910800 | 0.77746900  | -5.22345500 |
| H | 6.29291200 | 3.26445000  | -5.11287900 |

### TS-1-2-I-PMe<sub>3</sub>

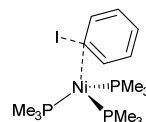

|                   |             |                         |             |
|-------------------|-------------|-------------------------|-------------|
| E                 | =           | -1796.04472876          |             |
| G <sub>corr</sub> | =           | 0.377611                |             |
| v                 | =           | -45.52 cm <sup>-1</sup> |             |
| Ni                | -1.22766800 | -0.66595800             | 0.31022100  |
| P                 | -0.47472200 | 0.44258700              | -1.45468100 |
| P                 | -0.40115100 | -2.73170400             | 0.26434200  |
| P                 | -3.45091400 | -0.79752000             | 0.16192500  |
| C                 | -0.71802400 | 0.67184700              | 1.97539500  |
| C                 | -1.50084000 | -0.12509200             | 2.85331200  |
| C                 | 0.68906900  | 0.47397000              | 1.95915700  |
| C                 | -0.88127800 | -1.04110400             | 3.71839800  |
| H                 | -2.56354100 | 0.06567900              | 2.94323100  |
| C                 | 1.28291200  | -0.44784400             | 2.82156700  |
| H                 | 1.30783200  | 1.09218600              | 1.32082900  |
| C                 | 0.50441700  | -1.18979600             | 3.72128100  |
| H                 | -1.49831700 | -1.61883400             | 4.40218300  |
| H                 | 2.36310100  | -0.57000800             | 2.80122800  |
| H                 | 0.97917800  | -1.88261200             | 4.41100100  |
| C                 | -4.37843200 | -1.98627000             | 1.25045300  |
| H                 | -4.18701500 | -1.74348200             | 2.30142400  |
| H                 | -5.46151500 | -1.96581900             | 1.07230200  |
| H                 | -4.01237000 | -3.00380100             | 1.07441100  |
| C                 | -4.51571300 | 0.70895000              | 0.37071900  |
| H                 | -5.57470200 | 0.49466800              | 0.17592900  |
| H                 | -4.41527000 | 1.09855600              | 1.38922100  |
| H                 | -4.17561500 | 1.49190000              | -0.31434900 |
| C                 | -4.04610300 | -1.37437100             | -1.50097300 |
| H                 | -3.72014300 | -0.66715000             | -2.27068000 |
| H                 | -3.60295100 | -2.34834000             | -1.73363900 |
| H                 | -5.13929400 | -1.46184700             | -1.54502900 |
| C                 | -0.16525900 | -0.60209000             | -2.95954300 |
| H                 | 0.13981500  | 0.00089100              | -3.82426500 |
| H                 | 0.62301100  | -1.33242500             | -2.74812300 |

|   |             |             |             |
|---|-------------|-------------|-------------|
| H | -1.07907800 | -1.14842200 | -3.21718200 |
| C | -1.58327900 | 1.72918500  | -2.21069300 |
| H | -2.55308800 | 1.28478000  | -2.45789700 |
| H | -1.75385600 | 2.53182100  | -1.48716200 |
| H | -1.15156000 | 2.15870700  | -3.12399100 |
| C | 1.10859500  | 1.41180000  | -1.41396100 |
| H | 1.93124100  | 0.76377600  | -1.09313300 |
| H | 1.35249700  | 1.83686700  | -2.39577000 |
| H | 1.01419100  | 2.23274900  | -0.69533800 |
| C | 1.43623300  | -2.94819300 | 0.09344800  |
| H | 1.93439800  | -2.46371100 | 0.93915200  |
| H | 1.73335600  | -4.00446900 | 0.05888000  |
| H | 1.77569000  | -2.45389800 | -0.82404200 |
| C | -0.97329800 | -3.81515600 | -1.13499200 |
| H | -0.80027600 | -3.31943000 | -2.09495000 |
| H | -0.45420400 | -4.78211900 | -1.13931100 |
| H | -2.04858900 | -4.00076800 | -1.04013200 |
| C | -0.72683400 | -3.88963700 | 1.67755700  |
| H | -0.24516300 | -3.50857800 | 2.58141700  |
| H | -1.80498400 | -3.93183600 | 1.86601300  |
| H | -0.35507000 | -4.90178600 | 1.47294700  |
| I | -1.41225000 | 2.76794000  | 1.66203000  |

#### 4-I-PMe<sub>3</sub>

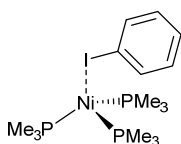

$$E = -1796.05331975$$

$$G_{\text{corr}} = 0.374202$$

|    |             |             |             |
|----|-------------|-------------|-------------|
| Ni | 2.49049200  | 7.76494000  | 11.86972100 |
| P  | 1.46795900  | 9.29256500  | 10.69778800 |
| C  | 1.23004600  | 10.98173200 | 11.44135700 |
| C  | -0.26941500 | 8.98593600  | 10.10796100 |
| C  | 2.26339900  | 9.77627500  | 9.08974300  |
| H  | 0.71601800  | 11.67288700 | 10.76046300 |
| H  | 2.20467600  | 11.40681300 | 11.70368600 |
| H  | -0.65036100 | 9.79746700  | 9.47359200  |
| H  | -0.93252400 | 8.87671300  | 10.97421500 |
| H  | 2.24374600  | 8.92718800  | 8.39963000  |
| H  | 3.31173000  | 10.03838600 | 9.26806600  |
| P  | 4.03338300  | 8.70826300  | 13.10119900 |
| P  | 3.06058600  | 6.00247100  | 10.71197300 |
| C  | 5.09107700  | 9.95087300  | 12.20812800 |
| C  | 5.38654800  | 7.74459800  | 13.94588800 |
| C  | 3.47063200  | 9.73357100  | 14.54534400 |
| C  | 3.17482300  | 6.18102000  | 8.86327100  |
| C  | 4.72276900  | 5.21689300  | 11.01566600 |
| C  | 1.98720300  | 4.48897900  | 10.81096500 |
| H  | 5.85312900  | 10.39602800 | 12.86130700 |
| H  | 4.46386700  | 10.75333700 | 11.80533800 |
| H  | 6.10153700  | 8.40062200  | 14.46018000 |
| H  | 5.92868200  | 7.14340300  | 13.20744600 |

|   |             |             |             |
|---|-------------|-------------|-------------|
| H | 2.95672900  | 9.08490900  | 15.26386500 |
| H | 2.74859000  | 10.48094100 | 14.19931400 |
| H | 3.88197400  | 6.98150100  | 8.61922200  |
| H | 2.19394100  | 6.45953900  | 8.46356800  |
| H | 5.50704200  | 5.96923500  | 10.87452100 |
| H | 4.91693700  | 4.37303300  | 10.34013400 |
| H | 1.94903500  | 4.13711200  | 11.84752800 |
| H | 2.35241600  | 3.67435300  | 10.17203500 |
| H | 0.64554800  | 10.89092200 | 12.36357700 |
| H | -0.30258100 | 8.04654900  | 9.54503100  |
| H | 1.75577600  | 10.62692100 | 8.61665300  |
| H | 3.50436100  | 5.25456000  | 8.37465100  |
| H | 4.78181200  | 4.85623200  | 12.04789700 |
| H | 0.96640800  | 4.74911200  | 10.51028600 |
| H | 4.29982300  | 10.24140200 | 15.05539300 |
| H | 5.58894700  | 9.45884100  | 11.36488800 |
| H | 4.94959700  | 7.06209400  | 14.68234200 |
| I | 0.59453300  | 6.98089800  | 13.52685400 |
| C | 1.45960400  | 5.42557000  | 14.72272300 |
| C | 2.79055200  | 5.09202400  | 14.47767900 |
| C | 0.71528100  | 4.76832200  | 15.70376700 |
| C | 3.39016200  | 4.07971400  | 15.23186900 |
| H | 3.33811700  | 5.62536400  | 13.70451000 |
| C | 1.32683100  | 3.75690800  | 16.45108800 |
| H | -0.32175800 | 5.03495800  | 15.88610100 |
| C | 2.66091900  | 3.41105300  | 16.21827100 |
| H | 4.42855300  | 3.81632700  | 15.04511600 |
| H | 0.75494300  | 3.23962200  | 17.21731800 |
| H | 3.12889900  | 2.62401500  | 16.80328400 |

#### TS-4-5-I-PMe<sub>3</sub>

$$E (\text{OSS}) = -1796.04305854$$

$$E (\text{T}) = -1796.02642847$$

$$S^2(\text{OSS}) = 0.6013$$

$$G_{\text{corr}} = 0.371398$$

$$v = -188.75 \text{ cm}^{-1}$$

|    |             |            |             |
|----|-------------|------------|-------------|
| Ni | -1.68677000 | 1.86665100 | 0.02369100  |
| P  | -2.46821200 | 3.47045700 | -1.33098600 |
| C  | -2.90535100 | 5.07052300 | -0.51227800 |
| C  | -4.04720400 | 3.07810500 | -2.21132200 |
| C  | -1.41106300 | 4.05967500 | -2.73263100 |
| H  | -3.35449100 | 5.78567100 | -1.21276600 |
| H  | -2.00617800 | 5.52123800 | -0.07845000 |
| H  | -4.37313500 | 3.89673900 | -2.86532600 |
| H  | -4.82580700 | 2.87387400 | -1.46938800 |
| H  | -1.22267500 | 3.22874000 | -3.41973500 |
| H  | -0.44546900 | 4.40303100 | -2.34672300 |
| P  | -0.07963000 | 2.83781900 | 1.27305500  |
| P  | -1.22264000 | 0.05003200 | -1.22720200 |
| C  | 0.94934800  | 4.13485700 | 0.43559100  |
| C  | 1.26296400  | 1.80468200 | 2.02669300  |
| C  | -0.67492000 | 3.75738700 | 2.76343800  |
| C  | -1.20260400 | 0.23833100 | -3.07170800 |

|   |             |             |             |   |             |             |             |
|---|-------------|-------------|-------------|---|-------------|-------------|-------------|
| C | 0.41963400  | -0.77736700 | -0.97731300 | H | -4.14553400 | 1.98576200  | -1.57438100 |
| C | -2.37039300 | -1.38483300 | -1.02731600 | H | -0.55882500 | 2.36754600  | -3.57638600 |
| H | 1.69157200  | 4.57156700  | 1.11560300  | H | 0.14376400  | 3.67306700  | -2.60742700 |
| H | 0.30690900  | 4.93831700  | 0.06014500  | P | 0.78266800  | 2.07515300  | 1.31078900  |
| H | 2.00658300  | 2.42106800  | 2.54787000  | P | -0.48629200 | -0.58500000 | -1.04271400 |
| H | 1.76656200  | 1.22770700  | 1.24335500  | C | 2.03733200  | 2.99424600  | 0.30419700  |
| H | -1.19030600 | 3.05496000  | 3.42672400  | C | 1.88259800  | 0.96208000  | 2.29957800  |
| H | -1.40437900 | 4.51318400  | 2.45334900  | C | 0.30580400  | 3.33260500  | 2.57283600  |
| H | -0.42017000 | 0.94911800  | -3.35864600 | C | -0.30324700 | -0.49879900 | -2.88041900 |
| H | -2.16555100 | 0.63131600  | -3.41492100 | C | 1.02325600  | -1.54509900 | -0.58284900 |
| H | 1.22355300  | -0.05301800 | -1.14907300 | C | -1.83063400 | -1.83041000 | -0.84432000 |
| H | 0.56035000  | -1.62996900 | -1.65421900 | H | 2.84907800  | 3.39997700  | 0.92088600  |
| H | -2.37013500 | -1.69977000 | 0.02112900  | H | 1.54675200  | 3.82077900  | -0.22116400 |
| H | -2.08954000 | -2.23479400 | -1.66189200 | H | 2.69803900  | 1.52275100  | 2.77288200  |
| H | -3.60897100 | 4.87046700  | 0.30204900  | H | 2.31496100  | 0.19395300  | 1.64982700  |
| H | -3.91471100 | 2.17167900  | -2.81193300 | H | -0.33503000 | 2.85446300  | 3.32035200  |
| H | -1.88385200 | 4.87845600  | -3.28893000 | H | -0.28343900 | 4.12084900  | 2.09248200  |
| H | -1.01364300 | -0.71619100 | -3.57880100 | H | 0.54863600  | 0.14054700  | -3.13607400 |
| H | 0.49753300  | -1.13509700 | 0.05408200  | H | -1.20589700 | -0.06309000 | -3.32103200 |
| H | -3.38861100 | -1.06841100 | -1.27609600 | H | 1.91387300  | -0.92876300 | -0.74762500 |
| H | 0.14072400  | 4.24407600  | 3.31301300  | H | 1.11549600  | -2.46502200 | -1.17291300 |
| H | 1.47246600  | 3.68961900  | -0.41810200 | H | -1.95150100 | -2.06263700 | 0.21774800  |
| H | 0.82721000  | 1.10117000  | 2.74235500  | H | -1.62111000 | -2.75232200 | -1.40000000 |
| I | -3.62365500 | 1.24820000  | 1.63132900  | H | -3.01981700 | 4.22531400  | 0.00490000  |
| C | -2.57836600 | -0.54034600 | 2.98269400  | H | -3.22226400 | 1.28341100  | -2.91140800 |
| C | -1.27683000 | -0.82185300 | 2.60465500  | H | -1.30259000 | 3.98501800  | -3.60293900 |
| C | -3.20369700 | -1.20546300 | 4.02838600  | H | -0.14507600 | -1.49159900 | -3.31879500 |
| C | -0.56117000 | -1.80824500 | 3.29568400  | H | 0.97346300  | -1.81391500 | 0.47586500  |
| H | -0.82701800 | -0.26730500 | 1.77817100  | H | -2.77265900 | -1.39647600 | -1.19490900 |
| C | -2.48529900 | -2.19255400 | 4.71931400  | H | 1.17756100  | 3.77834900  | 3.06699200  |
| H | -4.22802500 | -0.97094200 | 4.31212500  | H | 2.46570400  | 2.32401600  | -0.44988400 |
| C | -1.16858400 | -2.49223600 | 4.35396300  | H | 1.29744900  | 0.46964000  | 3.08133700  |
| H | 0.46423300  | -2.04138400 | 3.01287800  | I | -3.13896800 | 1.25303300  | 1.74196900  |
| H | -2.95471500 | -2.72598700 | 5.54380000  | C | -1.99922700 | -2.02430900 | 3.07063500  |
| H | -0.61716200 | -3.25769100 | 4.89431700  | C | -0.72747500 | -1.58913100 | 2.76067300  |

### 5-I-PMe<sub>3</sub>

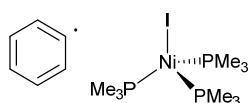

$$E(\text{OSS}) = -1796.04908611$$

$$E(\text{T}) = -1796.04880792$$

$$S^2(\text{OSS}) = 1.0098$$

$$G_{\text{corr}} = 0.369947$$

|    |             |            |             |
|----|-------------|------------|-------------|
| Ni | -1.01348900 | 1.33721100 | 0.10126100  |
| P  | -1.84396800 | 2.74744200 | -1.52362800 |
| C  | -2.33544900 | 4.38923200 | -0.83349200 |
| C  | -3.40414500 | 2.20609300 | -2.34909300 |
| C  | -0.79847400 | 3.24576700 | -2.96855300 |
| H  | -2.82310400 | 5.02208300 | -1.58497700 |
| H  | -1.44924900 | 4.90885900 | -0.45251300 |
| H  | -3.80187500 | 2.96734300 | -3.03134500 |

### 6-I-PMe<sub>3</sub>

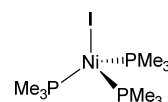

$$E = -1564.40705784$$

$$G_{\text{corr}} = 0.287279$$

|    |             |             |             |
|----|-------------|-------------|-------------|
| Ni | -1.84324800 | -0.47041800 | 0.07921600  |
| P  | -3.67235000 | 0.83299800  | -0.33312000 |

|   |             |             |             |   |             |             |             |
|---|-------------|-------------|-------------|---|-------------|-------------|-------------|
| C | -4.17073000 | 2.07806700  | 0.93713600  | C | 0.98561800  | 6.78770700  | 14.52758800 |
| C | -5.20502000 | -0.18462800 | -0.49073500 | C | 3.21612900  | 5.00879800  | 14.14315600 |
| C | -3.71537500 | 1.84136500  | -1.88501700 | H | 1.06731200  | 11.36551300 | 12.18679200 |
| H | -5.13735100 | 2.54125700  | 0.70425000  | H | 2.70003000  | 10.85700500 | 12.69592800 |
| H | -3.40975300 | 2.86365600  | 0.99811800  | H | -0.66755400 | 9.73261700  | 10.80900900 |
| H | -6.09094100 | 0.42899800  | -0.69384000 | H | -0.48658800 | 8.32496400  | 11.89205900 |
| H | -5.35087600 | -0.74269800 | 0.43972200  | H | 2.09272000  | 9.40044900  | 8.84533200  |
| H | -3.55483700 | 1.18376100  | -2.74671500 | H | 3.16784900  | 10.45810900 | 9.76951400  |
| H | -2.90261900 | 2.57640500  | -1.86908300 | H | 3.34566500  | 8.75787800  | 15.02748100 |
| P | -0.14197700 | 0.93142700  | 0.69769200  | H | 4.72298100  | 7.67434800  | 14.76902600 |
| P | -0.96025700 | -1.86388100 | -1.49890000 | H | 0.59966400  | 7.81254300  | 14.50468800 |
| C | 0.36832000  | 2.34285100  | -0.38093900 | H | 0.97072900  | 6.42970200  | 15.56371600 |
| C | 1.45901800  | 0.06443300  | 1.00569400  | H | 2.61246500  | 4.32647600  | 13.53548700 |
| C | -0.45114800 | 1.75441900  | 2.31875600  | H | 3.11262400  | 4.74087500  | 15.20133100 |
| C | 0.06553300  | -1.13883000 | -2.85632700 | H | 1.27001500  | 10.12157700 | 13.44506400 |
| C | 0.10925200  | -3.24578600 | -0.90411300 | H | -0.21515500 | 8.13603900  | 10.15179000 |
| C | -2.26680500 | -2.77092200 | -2.43936500 | H | 1.46406800  | 10.93554000 | 9.51324400  |
| H | 1.20553300  | 2.91013500  | 0.04293100  | H | 4.26021300  | 4.88926600  | 13.83718800 |
| H | -0.48304700 | 3.01876100  | -0.51857700 | H | 0.32163600  | 6.15787600  | 13.92568000 |
| H | 2.21298200  | 0.72914500  | 1.44426200  | H | 3.54516700  | 7.31616200  | 16.06226700 |
| H | 1.85020500  | -0.34044000 | 0.06586400  | I | 4.75342400  | 6.19204700  | 10.24449700 |
| H | -0.70886200 | 0.98519200  | 3.05354400  |   |             |             |             |
| H | -1.30629200 | 2.43263400  | 2.23085400  |   |             |             |             |
| H | 0.97406800  | -0.69586400 | -2.43361700 |   |             |             |             |
| H | -0.49920900 | -0.34275900 | -3.35401200 |   |             |             |             |
| H | 0.99547200  | -2.83431100 | -0.40903800 |   |             |             |             |
| H | 0.42646300  | -3.91106000 | -1.71673700 |   |             |             |             |
| H | -2.91041000 | -3.29548200 | -1.72511300 |   |             |             |             |
| H | -1.84768200 | -3.49675300 | -3.14646500 |   |             |             |             |
| H | -4.23258200 | 1.58340400  | 1.91170300  |   |             |             |             |
| H | -5.07727700 | -0.91280700 | -1.29921900 |   |             |             |             |
| H | -4.66769300 | 2.37070500  | -2.01253700 |   |             |             |             |
| H | 0.35840700  | -1.88907400 | -3.60093100 |   |             |             |             |
| H | -0.44854300 | -3.82098000 | -0.15809500 |   |             |             |             |
| H | -2.88296300 | -2.05157500 | -2.99025600 |   |             |             |             |
| H | 0.42104200  | 2.31937900  | 2.66880900  |   |             |             |             |
| H | 0.65791700  | 1.96145200  | -1.36634900 |   |             |             |             |
| H | 1.27410900  | -0.77149300 | 1.68817600  |   |             |             |             |
| I | -2.49900300 | -2.01070500 | 2.17983600  |   |             |             |             |

### 7-I-PMe<sub>3</sub>

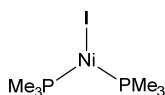

|                   |             |                |             |
|-------------------|-------------|----------------|-------------|
| E                 | =           | -1103.20076166 |             |
| G <sub>corr</sub> | =           | 0.179104       |             |
| Ni                | 3.02107300  | 7.39600400     | 11.66721000 |
| P                 | 1.70436400  | 9.17505000     | 11.23412200 |
| P                 | 2.68797800  | 6.74339800     | 13.81325500 |
| C                 | 1.67778300  | 10.51280700    | 12.50681500 |
| C                 | -0.09120800 | 8.81947700     | 10.99845700 |
| C                 | 2.13905100  | 10.09063600    | 9.69413400  |
| C                 | 3.66405900  | 7.70987000     | 15.04595400 |



### In *n*-Hexane

#### PhH

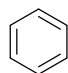

|                   |   |                                   |
|-------------------|---|-----------------------------------|
| E                 | = | -232.323983605                    |
| G <sub>corr</sub> | = | 0.073465                          |
| C                 |   | 3.70589900 1.91299500 0.09731400  |
| C                 |   | 5.02855700 2.16828700 -0.27308500 |
| C                 |   | 5.30158700 2.86508100 -1.45295300 |
| C                 |   | 4.25182000 3.30556600 -2.26273300 |
| C                 |   | 2.92907100 3.05022800 -1.89226100 |
| C                 |   | 2.65602400 2.35345000 -0.71257900 |
| H                 |   | 3.49371700 1.37081000 1.01535700  |
| H                 |   | 5.84529900 1.82523200 0.35707100  |
| H                 |   | 4.46380500 3.84788300 -3.18074700 |
| H                 |   | 2.11242000 3.39344200 -2.52243700 |
| H                 |   | 1.62680800 2.15474600 -0.42445400 |
| H                 |   | 6.33077500 3.06381900 -1.74109800 |

#### Ph•

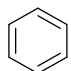

|                   |   |                                    |
|-------------------|---|------------------------------------|
| E                 | = | -231.634151943                     |
| G <sub>corr</sub> | = | 0.059624                           |
| C                 |   | 1.08911600 -0.03717900 0.00006800  |
| C                 |   | 2.48709500 -0.02944000 0.00046700  |
| C                 |   | 3.19297100 1.17727300 -0.00006400  |
| C                 |   | 2.50128200 2.40032400 -0.00093700  |
| C                 |   | 1.12504800 2.33036600 -0.00131100  |
| C                 |   | 0.37606800 1.17352000 -0.00088000  |
| H                 |   | 0.54753700 -0.98047900 0.00048500  |
| H                 |   | 3.03019000 -0.97061800 0.00119900  |
| H                 |   | 4.28073200 1.17470000 0.00024600   |
| H                 |   | 3.03719100 3.34602400 -0.00135700  |
| H                 |   | -0.71093500 1.18219000 -0.00119600 |

#### Hexane

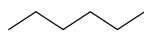

|                   |   |                                    |
|-------------------|---|------------------------------------|
| E                 | = | -237.171989133                     |
| G <sub>corr</sub> | = | 0.158283                           |
| C                 |   | 4.30635300 1.65426000 -0.70126800  |
| H                 |   | 4.96429200 2.26450200 -1.33697500  |
| H                 |   | 3.30432200 1.72035900 -1.14707800  |
| C                 |   | 4.77290600 0.19029800 -0.75004600  |
| H                 |   | 4.10385100 -0.42259700 -0.12725000 |
| H                 |   | 4.66001800 -0.18425700 -1.77768600 |
| C                 |   | 6.22335100 -0.03257900 -0.30206500 |

|   |  |                                    |
|---|--|------------------------------------|
| H |  | 6.34756100 0.28332200 0.74293000   |
| H |  | 6.88905900 0.61119400 -0.89710500  |
| C |  | 6.67864400 -1.49139000 -0.43553600 |
| H |  | 6.56112500 -1.81377000 -1.48005700 |
| H |  | 6.01260300 -2.13369600 0.15855000  |
| C |  | 8.12800200 -1.71011000 0.00700500  |
| H |  | 8.26850600 -1.42712900 1.05812900  |
| H |  | 8.82056400 -1.10520200 -0.59220700 |
| H |  | 8.42765400 -2.75989700 -0.09717400 |
| C |  | 4.26433400 2.25193400 0.70936300   |
| H |  | 3.62672900 1.65261400 1.37246800   |
| H |  | 5.26111700 2.29885900 1.16216400   |
| H |  | 3.86304900 3.27239900 0.69494500   |

#### Hexane radical

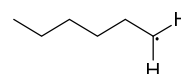

|                   |   |                                    |
|-------------------|---|------------------------------------|
| E                 | = | -236.505625587                     |
| G <sub>corr</sub> | = | 0.141932                           |
| C                 |   | 4.14198600 2.86583800 -0.96927300  |
| H                 |   | 4.23676800 3.61890500 -1.75033400  |
| C                 |   | 4.75210000 1.52116800 -1.20420800  |
| H                 |   | 4.19636700 0.75627200 -0.63878900  |
| H                 |   | 4.67249900 1.24756100 -2.26589200  |
| C                 |   | 6.24224800 1.43280300 -0.78679900  |
| H                 |   | 6.33332700 1.68981200 0.27804700   |
| H                 |   | 6.81666200 2.19115900 -1.33755900  |
| C                 |   | 6.85294300 0.04756400 -1.03109700  |
| H                 |   | 6.75786500 -0.20720300 -2.09633400 |
| H                 |   | 6.26968800 -0.70652800 -0.48329700 |
| C                 |   | 8.32334400 -0.03860800 -0.61293100 |
| H                 |   | 8.44486700 0.18218900 0.45520600   |
| H                 |   | 8.93659900 0.68085000 -1.17024700  |
| H                 |   | 8.73559700 -1.03841200 -0.79466400 |
| C                 |   | 3.77452800 3.32159200 0.40386400   |
| H                 |   | 3.36364600 2.49827000 1.00472000   |
| H                 |   | 4.64357400 3.71218500 0.96547700   |
| H                 |   | 3.03197300 4.12949100 0.38295500   |

#### H Abstraction TS: Ph• + Hexane

|                   |   |                                     |
|-------------------|---|-------------------------------------|
| E                 | = | -468.799635792                      |
| G <sub>corr</sub> | = | 0.228793                            |
| v                 | = | -1304.15 cm <sup>-1</sup>           |
| C                 |   | 0.55681800 -0.96172200 0.05857600   |
| C                 |   | 1.92526500 -0.67751400 0.15994000   |
| C                 |   | 2.49884800 0.16891700 -0.77780100   |
| C                 |   | 1.76974000 0.74242900 -1.80926800   |
| C                 |   | 0.40163500 0.45395200 -1.90396200   |
| C                 |   | -0.20007000 -0.39613100 -0.97151900 |
| H                 |   | 0.08461400 -1.62301700 0.78183600   |
| H                 |   | 2.51910700 -1.11513500 0.95975500   |

|   |             |             |             |   |            |             |             |
|---|-------------|-------------|-------------|---|------------|-------------|-------------|
| H | 2.24418000  | 1.40278500  | -2.53235200 | H | 9.92103100 | -1.49168100 | 0.26597300  |
| H | -0.19135800 | 0.89186500  | -2.70395800 | H | 9.90679100 | -1.42357600 | -1.50253200 |
| H | -1.26129000 | -0.61873800 | -1.04778100 | H | 9.97536600 | -2.98950200 | -0.67811700 |
| C | 5.15691000  | 0.66655100  | -0.54524300 | C | 5.31896300 | 1.48871800  | 0.72097900  |
| H | 5.39731900  | 1.24462000  | -1.44718000 | H | 5.00364400 | 0.91841000  | 1.60424500  |
| H | 3.92261800  | 0.45474300  | -0.67194100 | H | 6.36411000 | 1.78915300  | 0.87951600  |
| C | 5.82140000  | -0.70265900 | -0.55585400 | H | 4.71734900 | 2.40425700  | 0.68133600  |
| H | 5.48939900  | -1.27445800 | 0.32354600  |   |            |             |             |
| H | 5.47745400  | -1.26359200 | -1.43635800 |   |            |             |             |
| C | 7.35937700  | -0.65076200 | -0.56795900 |   |            |             |             |
| H | 7.71936500  | -0.12366500 | 0.32654300  |   |            |             |             |
| H | 7.69465200  | -0.05641300 | -1.43097500 |   |            |             |             |
| C | 8.00628800  | -2.04019400 | -0.62570700 |   |            |             |             |
| H | 7.65072900  | -2.56801500 | -1.52205000 |   |            |             |             |
| H | 7.66481200  | -2.63414000 | 0.23423000  |   |            |             |             |
| C | 9.53651900  | -1.98552100 | -0.63559200 |   |            |             |             |

## REFERENCES

- <sup>1</sup> Gaussian 09, Revision D.01, M. J. Frisch, G. W. Trucks, H. B. Schlegel, G. E. Scuseria, M. A. Robb, J. R. Cheeseman, G. Scalmani, V. Barone, G. A. Petersson, H. Nakatsuji, X. Li, M. Caricato, A. Marenich, J. Bloino, B. G. Janesko, R. Gomperts, B. Mennucci, H. P. Hratchian, J. V. Ortiz, A. F. Izmaylov, J. L. Sonnenberg, D. Williams-Young, F. Ding, F. Lipparini, F. Egidi, J. Goings, B. Peng, A. Petrone, T. Henderson, D. Ranasinghe, V. G. Zakrzewski, J. Gao, N. Rega, G. Zheng, W. Liang, M. Hada, M. Ehara, K. Toyota, R. Fukuda, J. Hasegawa, M. Ishida, T. Nakajima, Y. Honda, O. Kitao, H. Nakai, T. Vreven, K. Throssell, J. A. Montgomery, Jr., J. E. Peralta, F. Ogliaro, M. Bearpark, J. J. Heyd, E. Brothers, K. N. Kudin, V. N. Staroverov, T. Keith, R. Kobayashi, J. Normand, K. Raghavachari, A. Rendell, J. C. Burant, S. S. Iyengar, J. Tomasi, M. Cossi, J. M. Millam, M. Klene, C. Adamo, R. Cammi, J. W. Ochterski, R. L. Martin, K. Morokuma, O. Farkas, J. B. Foresman, and D. J. Fox, Gaussian, Inc., Wallingford CT, 2016.
- <sup>2</sup> Becke, A. D. *J. Chem. Phys.* **1993**, *98*, 5648-5652.
- <sup>3</sup> C. Lee, W. Yang, R.G. Parr *Phys. Rev. B. Condens. Matter.* **1988**, *37*, 785-789.
- <sup>4</sup> P. J. Stephens, F. J. Devlin, C. F. Chabalowski, M. J. Frisch, *J. Phys. Chem.* **1994**, *98*, 11623-11627.
- <sup>5</sup> S. Grimme, J. Antony, S. Ehrlich, H. Krieg, *J. Chem. Phys.* **2010**, *132*, 154104-19.
- <sup>6</sup> N. Fey, B. M. Ridgway, J. Jover, C. L. McMullin, J. N. Harvey, *J. N. Dalton Trans.* **2011**, *40*, 11184-11191.
- <sup>7</sup> M. M. Francl, W. J. Pietro, W. J. Hehre, J. S. Binkley, M. S. Gordon, D. J. DeFrees, J. A. Pople, *J. Chem. Phys.* **1982**, *77*, 3654-3665.
- <sup>8</sup> P. C. Hariharan, J. A. Pople, *Theoret. Chim. Acta* **1973**, *28*, 213-222.
- <sup>9</sup> W. J. Hehre, R. Ditchfield, J. A. Pople, *J. Chem. Phys.* **1972**, *56*, 2257-2261.
- <sup>10</sup> W. R. Wadt, P. J. Hay, *J. Chem. Phys.* **1985**, *82*, 284-298.
- <sup>11</sup> P. J. Hay, W. R. Wadt, *J. Chem. Phys.* **1985**, *82*, 270-284.
- <sup>12</sup> L. E. Roy, P. J. Hay, R. L. Martin, *J. Chem. Theor. Comput.* **2008**, *4*, 1029-1031.
- <sup>13</sup> A. W. Ehlers, M. Böhme, S. Dapprich, A. Gobbi, A. Höllwarth, V. Jonas, K. F. Köhler, R. Stegmann, A. Veldkamp, G. Frenking, *Chem. Phys. Lett.* **1993**, *208*, 111-114.
- <sup>14</sup> R. Krishnan, J.S. Binkley, R. Seeger, J.A. Pople, *J. Chem. Phys.* **1980**, *72*, 650-654.
- <sup>15</sup> K. Yamaguchi, F. Jensen, A. Dorigo, K. N. Houk, *Chem. Phys. Lett.* **1988**, *149*, 537-542.
- <sup>16</sup> S. Yamanaka, T. Kawakami, H. Nagao, K. Yamaguchi, *Chem. Phys. Lett.* **1994**, *231*, 25-33.
- <sup>17</sup> M. H. Lim, S. E. Worthington, F. J. Dulles, C. J. Cramer, in *Chemical Applications of Density Functional Theory*, Vol. 629 (Eds. B. B. Laird, R. B. Ross, T. Ziegler), American Chemical Society, Washington DC, **1996**; p 402.
- <sup>18</sup> H. Isobe, Y. Takano, Y. Kitagawa, T. Kawakami, S. Yamanaka, K. Yamaguchi, K. N. Houk, *Mol. Phys.* **2002**, *100*, 717-727.
- <sup>19</sup> H. Yu, Y. Fu, Q. Guo, Z. Lin, *Organometallics* **2009**, *28*, 4443-4451.
- <sup>20</sup> C. A. Tolman, *Chem. Rev.* **1977**, *77*, 313-348.
- <sup>21</sup> C. A. Tolman, W. C. Seidel, L. W. Gosser, *J. Am. Chem. Soc.* **1974**, *96*, 53-60.
- <sup>22</sup> J. A. Murphy, S.-Z. Zhou, D. W. Thomson, F. Schoenebeck, M. Mahesh, S. R. Park, T. Tuttle, L. E. A. Berlouis, *Angew. Chem. Int. Ed.* **2007**, *46*, 5178-5183.
- <sup>23</sup> a) L. E. Rush, P. G. Pringle, J. N. Harvey, *Angew. Chem. Int. Ed.* **2014**, *53*, 8672-8676. b) C. H. Bamford, C. F. H. Tipper, R. G. Compton, *Comprehensive Chemical Kinetics*, Vol. 25, Elsevier, B.V., Amsterdam, **1985**.
- <sup>24</sup> Taken from Sigma-Aldrich database: <http://www.sigmaaldrich.com/chemistry/solvents/toluene-center.html>
- <sup>25</sup> Taken from Sigma-Aldrich database: <http://www.sigmaaldrich.com/chemistry/solvents/tetrahydrofuran-center.html>
